# Supplementary material for: 2023 Reviewers and Editors
Source: Atypon-hosted journal article supplement (doi:10.1287/mnsc.2024.acknowledgements.v70.n4), 2024-04-01
Supplement: mnsc.2024.acknowledgements.v70.n4.sm1.pdf [file mnsc.2024.acknowledgements.v70.n4.sm1.pdf]

## 2023 *Management Science* All Reviewers

The editors of *Management Science* acknowledge all our 2023 reviewers and guest associate editors who generously provided expert counsel and guidance on a voluntary basis. We are grateful for their contributions; without them, the journal could not function. Here, we list all reviewers who contributed reviews in 2023.

Aaltonen, Aleksii, Temple University  
Abadi, Joseph, Federal Reserve Bank of Philadelphia  
Abbas, Ali, University of Illinois Urbana-Champaign  
Abbasi-Yadkori, Yasin, DeepMind Technologies Ltd.  
Abdallah, Tarek, Northwestern University  
Abdellaoui, Mohammed, HEC Paris  
Abdi, Farshid, Texas A&M University  
Abeler, Johannes, University of Oxford  
Abis, Simona, Columbia University  
Abito, Jose Miguel, Ohio State University  
Abraham, Mabel, Columbia University  
Abrardi, Laura, Polytechnic of Turin  
Abuzov, Rustam, University of Virginia  
Acimovic, Jason, Pennsylvania State University  
Acquisti, Alessandro, Carnegie Mellon University  
Adam, Hammaad, Massachusetts Institute of Technology  
Adam, Klaus, University of Mannheim  
Adamopoulos, Panagiotis, Emory University  
Adams, Renee, University of Oxford  
Adelino, Manuel, Duke University  
Adhikari, Binay, University of Texas at San Antonio  
Adjerid, Idris, Virginia Polytechnic Institute and State University  
Adusumilli, Karun, University of Pennsylvania  
Aflaki, Arian, University of Pittsburgh  
Afridi, Farzana, Indian Statistical Institute, Delhi Center  
Agarwal, Anish, Columbia University  
Agarwal, Isha, University of British Columbia  
Agarwal, Saharsh, Carnegie Mellon University  
Agarwal, Vikas, Georgia State University  
Agca, Senay, George Washington University  
Aggarwal, Ishani, Fundação Getulio Vargas  
Aghamolla, Cyrus, University of Minnesota  
Agnew, Julie, William & Mary  
Agranov, Marina, California Institute of Technology  
Agrawal, Anup, University of Alabama  
Aguilar, Luis, University of Zurich

Ahern, Kenneth, University of Southern California  
Ahluwalia, Jag, Royal Papworth Hospital  
Ahmed, Anwer, Texas A&M University  
Ahn, Daehwan, University of Pennsylvania  
Ahn, Dohyun, Chinese University of Hong Kong  
Ahnert, Toni, European Central Bank  
Ahuja, Vishal, Southern Methodist University  
Ahunbay, Mete, Technical University of Munich  
Ai, Hengjie, University of Wisconsin–Madison  
Aiello, Darren, Brigham Young University  
Akan, Mustafa, Carnegie Mellon University  
Akartunali, Kerem, Strathclyde Business School  
Akca, Alp, Eindhoven University of Technology  
Akey, Pat, University of Toronto  
Akkas, Arzum, Boston University  
Aksoy, Billur, Rensselaer Polytechnic Institute  
Aktas, Nihat, WHU – Otto Beisheim School of Management  
Alan, Yasin, Vanderbilt University  
Alashoor, Tawfiq, University of Navarra  
Albert, Michael, University of Virginia  
Albuquerque, Ana, Boston University  
Albuquerque, Paulo, INSEAD  
Aldatmaz, Serdar, George Mason University  
Alekseeva, Liudmila, KU Leuven  
Alexander, Diane, Wharton School of the University of Pennsylvania  
Alhusaini, Badryah, Arizona State University  
Alimohammadi, Yeganeh, Stanford University  
Alizamir, Saed, Yale University  
Allee, Kristian, University of Arkansas  
Allen, Eric, University of California, Riverside  
Allen, Ryan, University of Washington  
Allena, Rohit, University of Houston  
Allocca, Alessandra, Ludwig Maximilian University of Munich  
Almeida, Caio, Princeton University  
Almeida Costa, Afonso, Nova School of Business and Economics  
Alok, Shashwat, Indian School of Business  
Alon, Shiri, Bar-Ilan University  
Alonso, Ricardo, London School of Economics and Political Science  
Alp, Osman, University of Calgary  
Alptekinoglu, Aydin, Pennsylvania State University  
Alter, Adam, New York University  
Altug, Mehmet, George Mason University

Alur, Rohan, Massachusetts Institute of Technology  
Alvarez-Garrido, Elisa, University of South Carolina  
Alyakoob, Mohammed, University of Southern California  
Ambrose, Brent, Pennsylvania State University  
Ambuehl, Sandro, University of Zurich  
Amel-Zadeh, Amir, University of Oxford  
Amengual, Dante, Center for Monetary and Financial Studies  
Amir, On, University of California, San Diego  
Amore, Mario Daniele, Bocconi University  
An, Li, Tsinghua University  
An, Xudong, Federal Reserve Bank of Philadelphia  
Anagol, Santosh, University of Pennsylvania  
Anand, Vic, University of Illinois Urbana-Champaign  
Ananthakrishnan, Uttara, Carnegie Mellon University  
Anantharaman, Divya, Rutgers University  
Anderer, Arielle, Cornell University  
Anderson, Anders, Stockholm School of Economics  
Anderson, Edward, University of Texas at Austin  
Andre, Peter, IZA Institute of Labor Economics  
André, Quentin, University of Colorado Boulder  
Andrei, Daniel, McGill University  
Andrews, Michael, University of Maryland, Baltimore County  
Andrews, Michelle, Emory University  
Andriollo, Amedeo, University of Warwick  
Aneja, Abhay, University of California, Berkeley  
Ang, James, Florida State University  
Angelis, Georgios, Aix-Marseille University  
Angelucci, Charles, Massachusetts Institute of Technology  
Angelus, Alexandar, Texas A&M University  
Angeris, Guillermo, Bain Capital Crypto  
Angrisani, Marco, University of Southern California  
Anjos, Fernando, Nova School of Business and Economics  
Anjos, Miguel, University of Edinburgh  
Antill, Sam, Harvard Business School  
Anton, Miguel, IESE Business School  
Anunrojwong, Jerry, Columbia University  
Aobdia, Daniel, Pennsylvania State University  
Aolaritei, Liviu, ETH Zürich  
Aouad, Ali, London Business School  
Aoyagi, Jun, Hong Kong University of Science and Technology  
Apffelstaedt, Arno, Universität zu Köln  
Appel, Ian, University of Virginia

Aragon, George, Arizona State University  
Ardia, David, HEC Montréal  
Argyle, Bronson, Brigham Young University  
Aridor, Guy, Northwestern University  
Arif, Salman, University of Minnesota  
Arifoglu, Kenan, University College London  
Arikan, Mazhar, University of Kansas  
Armanios, Daniel, University of Oxford  
Arnosti, Nick, University of Minnesota, Twin Cities  
Arora, Kashish, Cornell University  
Arseniev-Koehler, Alina, Purdue University  
Arts, Sam, KU Leuven  
Artz, Martin, University of Münster  
Asay, Scott, University of Iowa  
Ascarza, Eva, Harvard University  
Aseri, Manmohan, University of Pittsburgh  
Ashraf, Musaib, Michigan State University  
Askin, Noah, INSEAD  
Assenova, Valentina, University of Pennsylvania  
Astashkina, Ekaterina, University of Michigan  
Astrove, Stacy, University of Delaware  
Atanasova, Christina, Simon Fraser University  
Atanassov, Julian, University of Nebraska  
Atasoy, Hilal, Rutgers University  
Atilgan, Yigit, Sabanci University  
Atmaz, Adem, Purdue University  
Au, Pak, Hong Kong University of Science and Technology  
Audia, Pino, Dartmouth College  
Audrino, Francesco, University of St. Gallen  
Augenblick, Ned, University of California, Berkeley  
Augustin, Patrick, McGill University  
Autrey, Romana, Willamette University  
Avdis, Efstathios, University of Alberta  
Avery, Mallory, Monash University  
Avoyan, Ala, Indiana University Bloomington  
Avramidis, Panagiotis, American College of Greece  
Ayabakan, Sezgin, Temple University  
Aydinliyim, Tolga, Baruch College  
Aydogan, Ilke, IÉSEG School of Management  
Ayoubi, Charles, Harvard Business School  
Ayvaci, Mehmet, University of Texas at Dallas  
Ba, Wenjia, Stanford Graduate School of Business

Baardman, Lennart, University of Michigan  
Babar, Yash, University of Wisconsin–Madison  
Baba-Yara, Fahiz, Indiana University  
Babenko, Ilona, Arizona State University  
Babich, Volodymyr, Georgetown University  
Babus, Ana, Washington University in St. Louis  
Bachmann, Kremena, Zurich University of Applied Sciences  
Backus, Matthew, University of California, Berkeley  
Bae, Jihun, Erasmus University Rotterdam  
Bae, Kee-Hong, York University  
Baek, Jackie, New York University  
Baer, Leah, University of Missouri  
Baesens, Bart, KU Leuven  
Baghai, Ramin, Stockholm School of Economics  
Bahaj, Saleem, Bank of England  
Bahamou, Achraf, Columbia University  
Bai, Bing, McGill University  
Bai, Jiaru, Stony Brook University  
Bai, John, Northeastern University  
Bai, Liang, King's College London  
Baik, Bok, Seoul National University  
Bailey, Anastasia, Rutgers University  
Bailey, James P., Rensselaer Polytechnic Institute  
Bailey, Warren, Cornell University  
Bairathi, Mimansa, University College London  
Baker, Steven, Federal Reserve Bank of Richmond Charlotte Branch  
Bakos, Yannis, New York University  
Balakina, Olga, Aarhus University  
Balakrishnan, Karthik, Rice University  
Baldacci, Roberto, University of Bologna  
Baldauf, Markus, University of British Columbia  
Bali, Turan G., Georgetown University  
Balkanski, Eric, Columbia University  
Ball, George, Indiana University  
Ball, Ian, Massachusetts Institute of Technology  
Ballesteros, Luis, Boston University  
Ballew, Hailey, Rice University  
Baloria, Vishal, Boston College  
Balseiro, Santiago, Columbia University  
Balsmeier, Benjamin, ETH Zürich  
Balter, Anne, Tilburg University  
Balyuk, Tetyana, Emory University

Ban, Gah-Yi, Imperial College London  
Bana, Sarah, Stanford University  
Banal-Estanol, Albert, Pompeu Fabra University  
Bandi, Chaithanya, National University of Singapore  
Bandi, Federico, Johns Hopkins University  
Banerjee, Dipayan, Georgia Institute of Technology  
Banerjee, Mitali, HEC Paris  
Banerjee, Ritwik, Indian Institute of Management Bangalore  
Banerjee, Sanjay, University of Alberta  
Banerjee, Shrabastee, Tilburg University  
Banerjee, Suman, Stevens Institute of Technology  
Bansal, Saurabh, Pennsylvania State University  
Bao, Jack, University of Delaware  
Bao, Yang, Shanghai Jiao Tong University  
Bao, Ying, University of Illinois Urbana-Champaign  
Bao, Zhengyang (Leo), Xiamen University  
Bapna, Sofia, University of Minnesota  
Barach, Moshe, University of Minnesota  
Baranchuk, Nina, University of Texas at Dallas  
Barankay, Iwan, University of Pennsylvania  
Baranov, Oleg, National Research University Higher School of Economics  
Barbalau, Adelina, University of Alberta  
Barberis, Nicholas, Yale University  
Barboni, Giorgia, University of Warwick  
Barbopoulos, Leonidas, University of Edinburgh  
Bar-Gill, Sagit, Massachusetts Institute of Technology  
Barinov, Alexander, University of California, Riverside  
Barjesteh, Nasser, University of Toronto  
Barla, Philippe, Université Laval  
Barneron, Meir, Hebrew University of Jerusalem  
Barnett, Michael D., Arizona State University  
Baron, Matthew, Cornell University  
Baron, Opher, University of Toronto  
Barrero, Jose Maria, Instituto Tecnológico Autónomo de México  
Barriola, Xabier, INSEAD  
Barrios, John, University of Chicago  
Barron, Daniel, Northwestern University  
Barron, Kai, WZB Berlin Social Science Center  
Barroso, Pedro, Católica-Lisbon Business and Economics  
Barr-Pulliam, Dereck, University of Louisville  
Barrymore, Nathan, University of Texas at Austin  
Bartels, Daniel, University of Chicago

Barth, Andreas, Goethe University  
Bartha, Paul, University of British Columbia  
Bartley, Timothy, Washington University in St. Louis  
Bartram, Sohnke, London Business School  
Baruch, Shmuel, University of Rome Tor Vergata  
Basic, Zvonimir, Max Planck Institute for Research on Collective Goods  
Basker, Emek, U.S. Census Bureau  
Bastani, Hamsa, Wharton School of the University of Pennsylvania  
Bastianello, Lorenzo, Paris-Panthéon-Assas University  
Basu, Sumanta, Cornell University  
Battiston, Diego, University of Edinburgh  
Baucells, Manel, University of Virginia  
Bauer, Michael, University of Hamburg  
Bauer, Tim, University of Waterloo  
Bauman, Konstantin, Temple University  
Bavafa, Hessam, University of Wisconsin–Madison  
Beane, Matt, University of California, Santa Barbara  
Becker, Joshua, University College London  
Becker, Markus, University of Southern Denmark  
Becker-Peth, Michael, Erasmus University  
Bedre-Defolie, Ozlem, ESMT Berlin  
Beer, Ruth, Baruch College  
Begen, Mehmet, Western University  
Bekes, Gabor, Central European University  
Bell, J. Jason, University of Oxford  
Belleflamme, Paul, Center for Operations Research and Econometrics  
Bellezza, Silvia, Columbia University  
Bellon, Aymeric, University of North Carolina at Chapel Hill  
Bellos, Ioannis, George Mason University  
Belo, Frederico, INSEAD  
Belo, Rodrigo, Nova School of Business and Economics  
Bender, Mark, University of Tampa  
Benedetti, Hugo, Universidad de Los Andes  
Benetton, Matteo, University of California, Berkeley  
Benjamin, Victor, Arizona State University  
Benndorf, Volker, Goethe University  
Ben-Ner, Avner, University of Minnesota  
Bennett, Magdalena, University of Texas at Austin  
Bennett, Victor, University of Utah  
Bennouri, Moez, ESC Montpellier  
Ben-Rephael, Azi, Rutgers University  
Benton, Richard, University of Illinois Urbana-Champaign

Benzell, Seth, Chapman University  
Berbeglia, Gerardo, University of Melbourne  
Berchicci, Luca, Erasmus University  
Berenguer, Gemma, Purdue University  
Berente, Nicholas, University of Notre Dame  
Berg, Tobias, Frankfurt School of Finance & Management  
Berge, Lars Ivar, Norwegian School of Economics  
Bergemann, Dirk, Yale University  
Berger, Elizabeth, University of Houston  
Berger, Leslie, Wilfrid Laurier University  
Berger, Loic, IÉSEG School of Management  
Bergman, Peter, University of Texas at Austin  
Bergstresser, Daniel, Brandeis University  
Berlin, Mitchell, Federal Reserve Bank of Philadelphia  
Berlingieri, Giuseppe, ESSEC Business School  
Berman, Jonathan, London Business School  
Berman, Ron, University of Pennsylvania  
Bernard, Darren, University of Washington  
Bernstein, Asaf, University of Colorado Boulder  
Bernstein, Ethan, Harvard Business School  
Beshears, John, Harvard Business School  
Best, Michael, Columbia University  
Beus, Jeremy, Washington State University  
Bhagwat, Vineet, George Washington University  
Bharath, Sreedhar, Arizona State University  
Bhaskarabhatla, Ajay, Erasmus University Rotterdam  
Bhaskaran, Sreekumar, Southern Methodist University  
Bhat, Gauri, Southern Methodist University  
Bhatt, Anjali, Harvard Business School  
Bhattacharya, Neil, Southern Methodist University  
Bhattacharya, Siddharth, Temple University  
Bhattacharjee, Anol, University of South Florida  
Bi, Xuan, University of Minnesota  
Bian, Bo, University of British Columbia  
Bianchi, Daniele, University of Warwick  
Bianchi, Milo, Toulouse School of Economics  
Bianchi, Nicola, Northwestern University  
Bias, Daniel, Vanderbilt University  
Bibaut, Aurelien, Netflix  
Bidder, Rhys, King's College London  
Bidkhori, Hoda, University of Pittsburgh  
Bidwell, Matthew, University of Pennsylvania

Biggs, Max, University of Virginia  
Bikard, Michael, INSEAD  
Bilionis, Ilias, Purdue University  
Billett, Matthew, Indiana University  
Billinger, Stephan, University of Southern Denmark  
Billings, Mary, New York University  
Binfarè, Matteo, University of Missouri  
Binz, Oliver, INSEAD  
Bird, Andrew, Chapman University  
Bird, Yanhua, Boston University  
Birinci, Serdar, Federal Reserve Bank of St. Louis  
Biro, Peter, Hungarian Academy of Sciences  
Birru, Justin, Ohio State University  
Bisceglia, Michele, Toulouse School of Economics  
Bischof, Jannis, University of Mannheim  
Bish, Ebru, University of Alabama  
Biswas, Arpita, Harvard University  
Biswas, Shirsho, University of Washington  
Bjarnadóttir, Margrét, University of Maryland, College Park  
Bjork, Robert, University of California, Los Angeles  
Black, Dirk, University of Nebraska–Lincoln  
Black, Ines, Duke University  
Black, Paul, Auburn University  
Blackburne, Terrence, Oregon State University  
Blaettchen, Philippe, City University of London  
Blair, Michael, Wilfrid Laurier University  
Blanco, Christian C., Ohio State University  
Blanes i Vidal, Jordi, London School of Economics and Political Science  
Blankespoor, Elizabeth, University of Washington  
Blasco, Andrea, Harvard University  
Blau, Benjamin, Utah State University  
Bleichrodt, Han, Erasmus University  
Bleier, Alexander, Frankfurt School of Finance & Management  
Blettner, Daniela, Simon Fraser University  
Blickle, Kristian, Federal Reserve Bank New York  
Bloch, Francis, École Polytechnique  
Bloomfield, Matt, Wharton School of the University of Pennsylvania  
Blunden, Hayley, Harvard Business School  
Bo, Inacio, University of York  
Bochkay, Khrystyna, University of Miami  
Bockstedt, Jesse, Emory University  
Boczoń, Marta, Copenhagen Business School

Bodnaruk, Andriy, University of Illinois Chicago  
Boehm, Johannes, Sciences Po  
Boehm, Robert, University of Vienna  
Bogan, Vicki, Cornell University  
Bogousslavsky, Vincent, Boston College  
Boguth, Oliver, Arizona State University  
Bojd, Behnaz, University of California, Irvine  
Bøler, Esther Ann, Imperial College London  
Bollen, Nicolas, Vanderbilt University  
Bollinger, Bryan, New York University  
Bolori, Alireza, University of Washington Tacoma  
Bonatti, Alessandro, Massachusetts Institute of Technology  
Bond, Brittany, Cornell University  
Bonet, Rocio, IE Business School  
Boneva, Teodora, University of Bonn  
Bonfim, Diana, Bank of Portugal  
Bonham, Jonathan, University of Illinois Chicago  
Bonner, Bryan, University of Utah  
Bonsall, Samuel, Pennsylvania State University  
Boons, Martijn, Tilburg University  
Boosey, Luke, Florida State University  
Borah, Abhishek, INSEAD  
Bord, Vitaly, Harvard University  
Bordalo, Pedro, University of Oxford  
Borisov, Alexander, University of Cincinnati  
Borovicka, Jaroslav, New York University  
Borowiecki, Karol, University of Southern Denmark  
Borwankar, Sameer, Purdue University  
Bos, Marieke, Stockholm School of Economics  
Bose, Subhonmesh, University of Illinois Urbana-Champaign  
Bossaerts, Peter, Cambridge University  
Botelho, Tristan, Yale University  
Boudreau, Kevin, Northeastern University  
Boudreau, Laura, Columbia University  
Boulatov, Alex, National Research University Higher School of Economics  
Boulou-Reshef, Béatrice, Université d'Orléans  
Bourreau, Marc, Télécom Paris  
Bourveau, Thomas, Columbia University  
Boussioux, Léonard, University of Washington  
Boutilier, Justin, University of Wisconsin–Madison  
Bouvard, Matthieu, Toulouse School of Economics  
Bouwens, Jan, University of Amsterdam

Bova, Francesco, University of Toronto  
Bowers, Anne, University of Toronto  
Bowles, Boone, Texas A&M University  
Boyabatli, Onur, Singapore Management University  
Boyarchenko, Nina, Federal Reserve Bank of New York  
Boyson, Nicole, Northeastern University  
Bradley, Daniel, University of South Florida  
Bradlow, Eric, University of Pennsylvania  
Brady, William, Northwestern University  
Braggion, Fabio, Tilburg University  
Braguinsky, Serguey, University of Maryland, College Park  
Brahm, Francisco, London Business School  
Brandimarte, Laura, University of Arizona  
Branger, Nicole, University of Muenster  
Branke, Juergen, University of Warwick  
Branstetter, Lee, Carnegie Mellon University  
Brantingham, Jeff, University of California, Los Angeles  
Braun, Michael, Southern Methodist University  
Braun, Reiner, Technical University of Munich  
Braverman, Anton, Northwestern University  
Bravo, Fernanda, University of California, Los Angeles  
Bray, Robert, Northwestern University  
Brazel, Joseph, North Carolina State University  
Brecko, Kristina, University of Rochester  
Breg, Nathaniel, Carnegie Mellon University  
Brenøe, Anne, University of Zurich  
Brent, Dan, Pennsylvania State University  
Breon-Drish, Bradyn, University of California, San Diego  
Breschi, Stefano, Bocconi University  
Bretscher, Lorenzo, London Business School  
Breuer, Matthias, Columbia University  
Breuer, Wolfgang, Rheinisch-Westfälische Technische Hochschule Aachen  
Brill, Markus, University of Warwick  
Brink, Alisa, Virginia Commonwealth University  
Brochet, Francois, Boston University  
Broekmeulen, Rob, Eindhoven University of Technology  
Brogaard, Jonathan, University of Utah  
Brolley, Michael, Wilfrid Laurier University  
Bronnenberg, Bart, Tilburg University  
Brown, Alexander, Texas A&M University  
Brown, David, Duke University  
Brown, David, University of Arizona

Brown, Gregory, University of North Carolina  
Brown, Jason, Indiana University  
Brown, Nerissa, University of Illinois Urbana-Champaign  
Brownback, Andy, University of Arkansas  
Brownlees, Christian, Pompeu Fabra University  
Brueckner, Jan, University of California, Irvine  
Bruno, Valentina, American University  
Bryan, Kevin, University of Toronto  
Bryzgalova, Svetlana, London Business School  
Bu, Jinzhi, Hong Kong Polytechnic University  
Büchel, Berno, University of Fribourg  
Buckman, Joseph, Georgia State University  
Budescu, David, Fordham University  
Budish, Eric, University of Chicago  
Buehler, Stefan, University of St. Gallen  
Buell, Ryan, Harvard Business School  
Burnap, Alex, Yale University  
Burnetas, Apostolos, University of Athens  
Burson, Katherine, University of Michigan  
Buser, Thomas, University of Amsterdam  
Bushong, Ben, Michigan State University  
Busse, Jeffrey, Emory University  
Butera, Luigi, Copenhagen Business School  
Buti, Sabrina, Paris Dauphine University  
Butler, Jeffrey, University of California, Merced  
Button, Patrick, Tulane University  
Buyuktahtakin, Esra, Virginia Tech  
Byard, Donal, Baruch College  
Byrne, David, University of Melbourne  
Byun, Heejung, Purdue University  
Byzalov, Dmitri, Temple University  
Cabral, Luis, New York University  
Cade, Nicole, University of Pittsburgh  
Cadman, Brian, University of Utah  
Cai, Jie, Drexel University  
Cai, Wei, Columbia University  
Cakici, Nusret, Fordham University  
Calder-Wang, Sophie, Wharton School of the University of Pennsylvania  
Caldieraro, Fabio, Brazilian School of Public and Business Administration  
Call, Andrew, Arizona State University  
Calmon, Andre, Georgia Institute of Technology  
Calvo, Eduard, University of Navarra

Campbell, Benjamin, Ohio State University  
Campbell, Dennis, Harvard University  
Campbell, John L., University of Georgia  
Campero, Santiago, University of Toronto  
Campos-Mercade, Pol, Lund University  
Camuffo, Arnaldo, Bocconi University  
Canales, Rodrigo, Yale School of Management  
Canayaz, Mehmet, Pennsylvania State University  
Candogan, Sidika Tunc, University College London  
Canidio, Andrea, IMT School for Advanced Studies  
Cannella, Albert, Texas A&M University  
Cao, Chengxin, Baruch College  
Cao, Jerry, Hang Seng University of Hong Kong  
Cao, Jie, Hong Kong Polytechnic University  
Cao, Jingcun, University of Hong Kong  
Cao, Junyu, University of Texas at Austin  
Cao, Ping, University of Science and Technology of China  
Cao, Sam, Harvard Business School  
Cao, Sean, University of Maryland, College Park  
Cao, Xinyu, Chinese University of Hong Kong  
Cao, Yi, George Mason University  
Cao, Ying, Chinese University of Hong Kong  
Cao, Yufeng, Shanghai Jiao Tong University  
Caplín, Andrew, New York University  
Capozza, Francesco, Erasmus University Rotterdam  
Carabias-Palmeiro, Jose, London School of Economics and Political Science  
Carden, Lila, University of Houston  
Cardinaels, Eddy, Tilburg University  
Carey, Colleen, Cornell University  
Carlana, Michela, Harvard University  
Carlson, Natalie, Wharton School of the University of Pennsylvania  
Carlsson, Fredrik, University of Gothenburg  
Carlsson, John, University of Southern California  
Carnabuci, Gianluca, European School of Management and Technology  
Carnahan, Seth, Washington University in St. Louis  
Carnes, Christina, Indiana University  
Carnes, Robert, University of Florida  
Carrera, Mariana, Montana State University  
Carrillo-Tudela, Carlos, University of Essex  
Cartea, Alvaro, University of Oxford  
Carton, Andrew, Wharton School of the University of Pennsylvania  
Caruso, Eugene, University of California, Los Angeles

Carvalho, Margarida, Université de Montréal  
Casas Arce, Pablo, Arizona State University  
Casner, Ben, Federal Trade Commission  
Cassar, Alessandra, University of San Francisco  
Cassell, Cory, University of Arkansas  
Cassella, Stefano, Tilburg University  
Castellaneta, Francesco, SKEMA Business School  
Castelo, Noah, University of Alberta  
Castillo, Marco, Texas A&M University  
Castro, Francisco, University of California, Los Angeles  
Casu Lukac, Barbara, City University of London  
Catherine, Sylvain, University of Pennsylvania  
Cavagnaro, Daniel, California State University, Fullerton  
Cazier, Richard, University of North Texas  
Cecere, Grazia, Institut Mines-Télécom  
Cederburg, Scott, University of Arizona  
Celier, Claire, University of Toronto  
Celik, Umit, University of North Carolina at Chapel Hill  
Cen, Ling, Chinese University of Hong Kong  
Cetemen, Doruk, City University of London  
Chabakauri, Georgy, London School of Economics and Political Science  
Chabi-Yo, Foussemi, University of Massachusetts Amherst  
Chadd, Ian, Rensselaer Polytechnic Institute  
Chague, Fernando, Fundação Getulio Vargas Sao Paulo School of Economics  
Chai, Sen, ESSEC Business School  
Chakraborty, Indraneel, University of Miami  
Chakraborty, Ishita, University of Wisconsin–Madison  
Chakraborty, Joymallya, Amazon.com  
Chakraborty, Mithun, University of Michigan  
Chakraborty, Soudipta, University of Kansas  
Chakravarty, Sujoy, Jawaharlal Nehru University  
Chamberlain, Rebecca, Goldsmiths, University of London  
Chambers, Christopher, Georgetown University  
Chan, Eric, University of Texas at Austin  
Chan, Lester, Xiamen University  
Chan, Tian, Emory University  
Chang, Edward, Harvard Business School  
Chang, Jen-Wen, California State University, Fullerton  
Chang, Melody, University of Southern California  
Chang, Pao-Li, Singapore Management University  
Chang, Tom, University of Southern California  
Chang, Xin, Nanyang Technological University

Chang, Yanling, Texas A&M University  
Chao, Matthew, Williams College  
Chapman, Gretchen, Carnegie Mellon University  
Chapman, Kimball, Arizona State University  
Charness, Gary, University of California, Santa Barbara  
Charoenwong, Ben, National University of Singapore  
Chatain, Olivier, HEC Paris  
Chatterjee, Chirantan, University of Sussex  
Chattopadhyay, Akash, University of Toronto  
Chaturvedi, Aadhaar, University of Auckland  
Chaturvedi, Sugat, University of Sussex  
Chauvin, Jasmina, Georgetown University  
Chava, Sudheer, Georgia Institute of Technology  
Chavda, Ankur, HEC Paris  
Chehrazi, Naveed, Washington University in St. Louis  
Chen, Andrew, Federal Reserve Board  
Chen, Bowei, University of Glasgow  
Chen, Boxiao, University of Illinois Chicago  
Chen, Cathy Yi-Hsuan, University of Glasgow  
Chen, Chen, Monash University  
Chen, Chen, New York University Shanghai  
Chen, Christopher, Indiana University Bloomington  
Chen, Chun Hung, George Mason University  
Chen, Clara, University of Illinois Urbana-Champaign  
Chen, Fadong, Zhejiang University  
Chen, Feng, University of Toronto  
Chen, Gary, DePaul University  
Chen, Hailiang, University of Hong Kong  
Chen, Hao, University of California, Davis  
Chen, Hongfan, Chinese University of Hong Kong  
Chen, Hongqiao, Nanjing University  
Chen, Hua, University of Georgia  
Chen, Jason, University of Illinois Chicago  
Chen, Jeff, Texas Christian University  
Chen, Jie, University of Leeds  
Chen, Jing, Stevens Institute of Technology  
Chen, Kay-Yut, University of Texas at Arlington  
Chen, Li, Cornell University  
Chen, Li, University of Gothenburg  
Chen, Liwei, University of Cincinnati  
Chen, Louis, Naval Postgraduate School  
Chen, Lucy, National University of Singapore

Chen, Min, Florida International University  
Chen, Min, George Mason University  
Chen, Mingliu, University of Texas at Dallas  
Chen, Ningyuan, University of Toronto Mississauga  
Chen, Novia, University of Houston  
Chen, Qi (George), London Business School  
Chen, Rachel, University of California, Davis  
Chen, Ruyu, Stanford University  
Chen, Shannon, University of Arizona  
Chen, Shi, University of Washington  
Chen, Shuaiyu, Purdue University  
Chen, Tao, Nanyang Business School  
Chen, Ting, University of Massachusetts  
Chen, Wei, University of Connecticut  
Chen, Wen, City University of Hong Kong  
Chen, Wilbur, Hong Kong University of Science and Technology  
Chen, Xia, Singapore Management University  
Chen, Xiayu, Hefei University of Technology  
Chen, Xinlei, Cheung Kong Graduate School of Business  
Chen, Yangyang, City University of Hong Kong  
Chen, Yanzhen, Hong Kong University of Science and Technology  
Chen, Yilun, Cornell University  
Chen, Ying, National University of Singapore  
Chen, Yiqun, University of Illinois Chicago  
Chen, Yiting, National University of Singapore  
Chen, Yiwei, Temple University  
Chen, Yong, Texas A&M University  
Chen, Yuxin, New York University Shanghai  
Chen, Zenan, University of Minnesota, Twin Cities  
Chen, Zhi, City University of Hong Kong  
Chen, Zhi, National University of Singapore  
Chen, Zhichen, Boston University  
Cheng, Aaron, London School of Economics and Political Science  
Cheng, Ing-Haw, University of Toronto  
Cheng, Lin, China Europe International Business School  
Cheng, Mei, University of Arizona  
Cheng, Si, Syracuse University  
Cheng, Xiaoyu, Florida State University  
Cheng, Xienan, Peking University  
Chernenko, Sergey, Purdue University  
Cheung, Paul, University of Texas at Dallas  
Cheung, Wang Chi, National University of Singapore

Cheyne, Edwige, Washington University in St. Louis  
Cheyre, Cristobal, Cornell University  
Chinco, Alex, Baruch College  
Ching, Andrew, Johns Hopkins University  
Ching, Kenny, Worcester Polytechnic Institute  
Chintapalli, Prashant, Western University  
Cho, Thummim, London School of Economics and Political Science  
Choe, Chongwoo, Monash University  
Choi, Ben, Nanyang Technological University  
Choi, Darwin, Chinese University of Hong Kong  
Choi, David, Carnegie Mellon University  
Choi, Hana, University of Rochester  
Choi, Jaewon, University of Illinois Urbana-Champaign  
Choi, Jay, Michigan State University  
Choi, Jongwoon, University of Wisconsin–Madison  
Choi, Joonkyu, Federal Reserve Board  
Choi, Jung Ho, Stanford Graduate School of Business  
Choi, W. Jason, University of Maryland, College Park  
Chondrakis, George, Esade Business School  
Chou, Mabel, National University of Singapore  
Choudhary, Vivek, INSEAD Asia Campus  
Choudhury, Preeti, University of Arizona  
Choukhmane, Taha, Massachusetts Institute of Technology  
Christensen, Dane, University of Oregon  
Christensen, Jens, Federal Reserve Bank of San Francisco  
Christensen, Theodore, University of Georgia  
Chu, Johan, Massachusetts Institute of Technology  
Chu, Leon, Cheung Kong Graduate School of Business  
Chu, Yongqiang, University of North Carolina at Charlotte  
Chuang, Valerie, Massachusetts Institute of Technology  
Chugh, Dolly, New York University  
Chugunova, Marina, Max Planck Institute for Research on Collective Goods  
Chung, Hao, Carnegie Mellon University  
Chung, Kevin, University of Wisconsin–Madison  
Chychyla, Roman, University of Miami  
Cianciaruso, Davide, New Economic School  
Cicero, David, Auburn University  
Cici, Gjergji, University of Kansas  
Cil, Eren, University of Oregon  
Cillo, Alessandra, Carlo Cattaneo University  
Cioaca, Larisa, Duke University  
Ciocan, Florin, INSEAD

Clara, Nuno, Duke University  
Clark, Andrew, Paris School of Economics  
Clark, Jessica, University of Maryland, College Park  
Clark-Joseph, Adam, University of Illinois Urbana-Champaign  
Clement, Jeff, University of Minnesota  
Coali, Andrea, Bocconi University  
Cobb, J. Adam, University of Texas at Austin  
Coffman, Lucas, Ohio State University  
Cohen, Daniel, Vanderbilt University  
Cohen, Taya, Carnegie Mellon University  
Cohn, Alain, University of Michigan  
Cohn, Jonathan, University of Texas at Austin  
Colaiacono, Innessa, Harvard University  
Colak, Ahmet, Clemson University  
Cole, Allison, Arizona State University  
Coleman, Braiden, University of Georgia  
Colini Baldeschi, Riccardo, Meta Platforms, Inc.  
Collard, Fabrice, Toulouse School of Economics  
Colliard, Jean-Edouard, HEC Paris  
Collis, Avinash, University of Texas at Austin  
Combe, Julien, École Polytechnique  
Comerton-Forde, Carole, University of Melbourne  
Commerford, Benjamin, University of Kentucky  
Comola, Margherita, Université Paris-Saclay  
Compiani, Giovanni, University of California, Berkeley  
Comprix, Joseph, Syracuse University  
Conejo, Antonio, Ohio State University  
Cong, Jiajia, Fudan University  
Conlon, Chris, New York University  
Connolly, Amy, James Madison University  
Conti, Annamaria, IE Business School  
Conti, Raffaele, ESSEC Business School  
Contigiani, Andrea, Ohio State University  
Cookson, J. Anthony, University of Colorado Boulder  
Cooper, Ilan, BI Norwegian Business School  
Cooper, William, University of Minnesota  
Coqueret, Guillaume, Emlyon Business School  
Corgnet, Brice, Emlyon Business School  
Corradi, Valentina, University of Surrey  
Correia, Filipe, University of Georgia  
Correia, Maria, London School of Economics and Political Science  
Cortes, Kristle, University of New South Wales

Cortes, Patricia, Boston University  
Cory-Wright, Rya, Imperial College  
Cosma, Antonio, Université du Luxembourg  
Coulombe, Janie, University of Montreal  
Coutts, Alexander, York University  
Coviello, Decio, HEC Montreal  
Cowan, Simon, University of Oxford  
Craig, Ashley, Harvard University  
Crainich, David, Centre National de la Recherche Scientifique  
Crama, Pascale, Singapore Management University  
Crane, Alan, Rice University  
Crawford, Steve, University of Houston  
Crifo, Patricia, University Paris West  
Crippa, Ludovico, Stanford Graduate School of Business  
Criscuolo, Paola, Imperial College London  
Croce, Mariano Massimiliano, Bocconi University  
Crosignani, Matteo, Federal Reserve Bank of New York  
Crotty, Kevin, Rice University  
Cui, Ruomeng, Emory University  
Cui, Shiliang, Georgetown University  
Cui, Yao, Cornell University  
Cui, Yifan, Zhejiang University  
Cullen, Zoe, Harvard Business School  
Cumbul, Eray, TOBB University of Economics and Technology  
Cumming, Douglas, Florida Atlantic University  
Cummings, Jonathon, Duke University  
Cummings, Rachel, Georgia Institute of Technology  
Cummings, Trey, Johns Hopkins University  
Cunha, Igor, University of Kentucky  
Cunningham, Colleen, University of Utah  
Cunningham, Lauren, University of Tennessee  
Cuny, Christine, New York University  
Curley, Shawn, University of Minnesota  
Curtis, Asher, University of Washington  
Cusimano, Corey, Yale University  
Cussens, James, University of Bristol  
Custodio, Claudia, Imperial College London  
Cvijanovic, Dragana, University of North Carolina at Chapel Hill  
Da, Rui, University of Chicago  
Da, Zhi, University of Notre Dame  
D'Acunto, Francesco, Georgetown University  
Dagostino, Ramona, University of Rochester

Dahan, Mathieu, Georgia Institute of Technology  
Dai, Junyi, Zhejiang University  
Dai, Min, Hong Kong Polytechnic University  
Dai, Tinglong, Johns Hopkins University  
Dai, Weijia (Daisy), Purdue University  
Dai, Xin, Drexel University  
Dakhlallah, Diana, McGill University  
Dambra, Michael, University at Buffalo  
Dana, Jason, Yale University  
Danaher, Brett, Chapman University  
Dangl, Thomas, Vienna University of Technology  
Daniels, David, National University of Singapore  
Daniels, Kaitlin, Washington University in St. Louis  
Dannals, Jennifer, Yale University  
Dannhauser, Caitlin, Villanova University  
D'Annunzio, Anna, Toulouse Business School  
Danz, David, University of Pittsburgh  
Dao, Duy, University of Calgary  
Dargnies, Marie-Pierre, Paris Dauphine University  
Da Rin, Marco, Tilburg University  
Das, Bikramjit, Singapore University of Technology and Design  
Das, Sanjiv, Santa Clara University  
Das, Sanmay, George Mason University  
Dasaratha, Krishna, Yale University  
Dass, Nishant, Claremont McKenna College  
D'Astous, Philippe, HEC Montreal  
Datta, Hannes, Tilburg University  
Davidson, Robert, Virginia Tech  
Davies, Ryan, Babson College  
Davies, Shaun, University of Colorado Boulder  
Davis, Carter, Indiana University  
Daviss, Claire, Stanford University  
Davis-Stober, Clinton, University of Missouri  
Davoodalhosseini, Mohammad, Bank of Canada  
Davydiuk, Tetiana, Johns Hopkins University  
Daw, Andrew, University of Southern California  
Dawande, Milind, University of Texas at Dallas  
Day, Robert, University of Connecticut  
Dayarian, Iman, University of Alabama  
De Almeida, Adiel, Federal University of Pernambuco  
De-Arteaga, Maria, University of Texas at Austin  
De Bettignies, Jean-Etienne, University of Toronto

Décaire, Paul, Arizona State University  
De Castro, Luciano, University of Iowa  
Decelles, Katherine, University of Toronto  
De Cesari, Amedeo, University of Manchester  
De Chiara, Alessandro, Universitat de Barcelona  
Deck, Cary, University of Arkansas  
De Corniere, Alexandre, Toulouse School of Economics  
De Franco, Gus, Purdue University  
De George, Emmanuel, University of Miami  
De Giorgi, Enrico, University of St. Gallen  
De Giovanni, Pietro, SDA Bocconi School of Management  
De Haan, Thomas, University of Bergen  
De Haas, Ralph, European Bank for Reconstruction and Development  
De Jonghe, Olivier, National Bank of Belgium  
Delana, Kraig, IE Business School  
De La O, Ricardo, University of Southern California  
De La Rosa, Wendy, Wharton School of the University of Pennsylvania  
Delarue, Arthur, Georgia Institute of Technology  
Del Carpio, Lucia, INSEAD  
Delecourt, Solène, Stanford University  
Delfgaauw, Josse, Erasmus University Rotterdam  
Delgado, Mercedes, Copenhagen Business School  
Delikouras, Stefanos, University of Miami  
Delis, Manthos, Audencia Business School  
Della Corte, Pasquale, Imperial College London  
Dell'Acqua, Fabrizio, Harvard Business School  
Deller, Carolyn, Wharton School of the University of Pennsylvania  
De Marco, Filippo, Bocconi University  
Demerjian, Peter, Georgia State University  
Demers, Elizabeth, University of Waterloo  
Demiral Saglam, Elif, Austin Peay State University  
Demirci, Irem, Nova School of Business and Economics  
Demirezen, Emre, University of Florida  
Demiroglu, Cem, Koç University  
Demirtaş, Derya, University of Twente  
Den Boer, Arnoud, University of Amsterdam  
Denes, Matthew, Carnegie Mellon University  
Deng, Chaoqun, Baruch College  
Deng, Yao, University of Connecticut  
Deng, Yiting, University College London  
Denton, Brian, University of Michigan  
De Oliveira, Angela, University of Massachusetts Amherst

Deore, Aishwarrya, Georgetown University  
De Quidt, Jonathan, Stockholm University  
D'Erasmus, Pablo, Federal Reserve Bank of Philadelphia  
Derksen, Laura, University of Toronto  
Derrien, François, HEC Paris  
Dertwinkel-Kalt, Markus, Universität Konstanz  
Derwall, Jeroen, Maastricht University  
Desai, Preyas, Duke University  
Deserranno, Erika, Northwestern University  
Deshmane, Abhishek, Georgia Institute of Technology  
De Simone, Lisa, University of Texas at Austin  
Desir, Antoine, INSEAD  
Desjardine, Mark, Dartmouth College  
De Sousa, Jose, Université Paris-Saclay  
Despotakis, Stylianos, City University of Hong Kong  
Dessaint, Olivier, University of Toronto  
Dessein, Wouter, Columbia University  
De Stefano, Federica, HEC Paris  
Detzel, Andrew, University of Denver  
De Vaan, Mathijs, University of California, Berkeley  
Devalve, Levi, University of Chicago  
Devereux, Michael, Oxford University  
Dew, Ryan, Wharton School of the University of Pennsylvania  
Dewitte, Siegfried, KU Leuven  
Dhanorkar, Suvrat, Pennsylvania State University  
Dhillon, Paramveer, University of Michigan  
Dhingra, Vibhuti, York University  
Diamond, William, University of Pennsylvania  
Dianat, Ahrash, University of Essex  
Dick, Travis, Google, Inc.  
Dick-Nielsen, Jens, Copenhagen Business School  
Dietvorst, Berkeley, University of Chicago  
Di Giuli, Alberta, ESCP Business School  
Dikolli, Shane, University of Virginia  
Di Maggio, Marco, Harvard Business School  
Dimant, Eugen, University of Pennsylvania  
Dimitri, Nicola, University of Siena  
Dimitriadis, Stefan, University of Toronto  
Dimitrov, Valentin, Rutgers University  
Dimmery, Drew, University of Vienna  
Dinev, Tamara, Florida Atlantic University  
Ding, Min, Pennsylvania State University

Ding, Yi, University of Macau  
Ding, Yichuan, McGill University  
Disney, Stephen, University of Exeter  
Dixon, Peter, U.S. Securities and Exchange Commission  
Dizdarer, Tolga, Boston College  
Dlugosz, Jennifer, Federal Reserve Board  
Dobrev, Dobrislav, Federal Reserve Board  
Dobson, Kyle, University of Virginia  
Doerrenberg, Philipp, University of Mannheim  
Dogan, Battal, University of Bristol  
Doganoglu, Toker, University of Würzburg  
Dolatabadi, Iman, Cornerstone Research  
Donahue, Kate, Cornell University  
Donati, Dante, Columbia University  
Donelson, Dain, University of Iowa  
Dong, Jing, Columbia University  
Dong, John Qi, Nanyang Technological University  
Dong, Lingxiu, Washington University in St. Louis  
Dong, Yan, University of South Carolina  
Dongho, Song, Johns Hopkins University  
Donkor, Kwabena, Stanford Graduate School of Business  
Donovan, John, University of Notre Dame  
Doosti, Shahryar, Chapman University  
Dorison, Charles, Georgetown University  
Dorn, Daniel, Drexel University  
Dorner, Florian, Max Planck Institute for Intelligent Systems  
Dorobantu, Sinziana, New York University  
Doshi, Hitesh, University of Houston  
Dou, Winston, Wharton School of the University of Pennsylvania  
Dou, Yifan, Fudan University  
Dou, Yiwei, New York University  
Dougal, Casey, Florida State University  
Douthit, Jeremy, University of Arizona  
Dovern, Jonas, University of Erlangen–Nuremberg  
Down, Andrea, University of Toronto  
Doxey, Marcus, University of Alabama  
Drake, David, University of Colorado Boulder  
Drake, Michael, Brigham Young University  
Drakopoulos, Kimon, University of Southern California  
Drouvelis, Michalis, University of Birmingham  
Drymiotes, George, Texas Christian University  
Du, Chuan, Bank of England

Du, Jinzhao, University of Hong Kong  
Du, Kai, Pennsylvania State University  
Du, Zaichao, Fudan University  
Duan, Jason, University of Texas at Austin  
Duarte, Guilherme Jardim, University of Pennsylvania  
Duarte, Jefferson, Rice University  
Duffy, John, University of California, Irvine  
Duguay, Raphael, Yale School of Management  
Dumas, Tracy, Ohio State University  
Dumbalska, Tsvetomira, Oxford University  
Dur, Robert, Erasmus University Rotterdam  
Dur, Umut, North Carolina State University  
Durnev, Artem, University of Iowa  
Duro, Miguel, University of Navarra  
Dutt, Nilanjana, Bocconi University  
Dutta, Sunasir, University of Minnesota  
Dutz, Deniz, University of Chicago  
Dwenger, Nadjia, University of Hohenheim  
Dyer, Travis, Brigham Young University  
Dyreg, Scott, Duke University  
Eaton, Gregory, University of Georgia  
Eble, Alex, Teachers College, Columbia University  
Eckman, David, Texas A&M University  
Economou, Antonis, University of Athens  
Eesley, Charles, Stanford University  
Eftekhari, Saeede, Tulane University  
Egan, Mark, Harvard Business School  
Ege, Matthew, Texas A&M University  
Eguia, Jon, Michigan State University  
Ehlers, Lars, University of Montreal  
Ehrgott, Matthias, Lancaster University  
Ehsani, Sina, Northern Illinois University  
Eiling, Esther, University of Amsterdam  
Eisdorfer, Assaf, University of Connecticut  
Eisenbach, Thomas, Federal Reserve Bank of New York  
Eisert, Tim, Erasmus University Rotterdam  
Ekström, Mathias, Norwegian School of Economics  
El-Amine, Hadi, George Mason University  
Elfenbein, Daniel, Washington University in St. Louis  
El Hajj, Hussein, Santa Clara University  
El Housni, Omar, Cornell Tech  
Elias, Julio, Universidad del CEMA

Elkamhi, Redouane, University of Toronto  
Ellahie, Atif, University of Utah  
Ellingsen, Tore, Stockholm School of Economics  
Ellis, Jesse, North Carolina State University  
Elmachtoub, Adam, Columbia University  
Emadi, Seyed M., University of North Carolina at Chapel Hill  
Emanuel, Natalia, Princeton University  
Emett, Scott, Arizona State University  
En, Christopher, Columbia University  
Enache, Luminita, University of Calgary  
Engel, Christoph, Max Planck Institute for Research on Collective Goods  
Epstein, Natalie, Harvard Business School  
Epure, Mircea, Pompeu Fabra University  
Eraker, Bjorn, University of Wisconsin–Madison  
Erat, Sanjiv, University of California, San Diego  
Erdil, Aytok, University of Cambridge  
Erev, Ido, Technion – Israel Institute of Technology  
Ericson, Keith, Boston University  
Eriksson, Tor, Aarhus University  
Eriksson-Zetterquist, Ulla, University of Gothenburg  
Erkan, Hale, Arizona State University  
Erkens, David, China Europe International Business School  
Ermolov, Andrey, Fordham University  
Ernst, Thomas, University of Maryland  
Erol, Atiye, Wharton School of the University of Pennsylvania  
Ersahin, Nuri, Michigan State University  
Ertac, Seda, Koç University  
Ertan, Aytok, London Business School  
Ertekin, Necati, University of Minnesota  
Ertimur, Yonca, University of Colorado Boulder  
Escamilla, Rafael, Arizona State University  
Esenduran, Gökçe, Purdue University  
Espinosa, Miguel, Bocconi University  
Esplin, Adam, University of Texas at El Paso  
Esteves-Sorenson, Constanca, Yale University  
Etro, Federico, Università degli Studi di Firenze  
Eufinger, Christian, IESE Business School  
Evangelidis, Ioannis, Esade Business School  
Evans, Richard, University of Virginia  
Even-Tov, Omri, University of California, Berkeley  
Exley, Christine, Harvard Business School  
Eyring, Henry, London School of Economics and Political Science

Faber, Marius, Swiss National Bank  
Fabisik, Kornelia, University of Bern  
Fadeev, Evgenii, Duke University  
Fahn, Matthias, Johannes Kepler University Linz  
Fainmesser, Itay, Johns Hopkins University  
Falato, Antonio, Federal Reserve Board  
Falch, Ranveig, Norwegian School of Economics  
Falchetti, Denise, George Washington University  
Falco, Paolo, University of Copenhagen  
Falk, Brett, University of Pennsylvania  
Fallah, Alireza, Massachusetts Institute of Technology  
Fan, Jingting, Pennsylvania State University  
Fan, Lei, University of Illinois Urbana-Champaign  
Fan, Lin, Stanford University  
Fan, Qintao, University of Oregon  
Fan, Weiwei, Tongji University  
Fan, Xiaoyu, New York University  
Fan, Yang, Stanford University  
Fang, Christina, New York University  
Fang, Xin, Singapore Management University  
Farahani, Mehdi, Massachusetts Institute of Technology  
Fardeau, Vincent, National Research University Higher School of Economics  
Farina, Gabriele, Massachusetts Institute of Technology  
Faro, David, London Business School  
Farre-Mensa, Joan, University of Illinois Chicago  
Farronato, Chiara, Harvard Business School  
Fatehi, Soraya, University of Texas at Dallas  
Fath, Sean, Cornell University  
Fattahi, Ali, University of California, Los Angeles  
Fattinger, Felix, Vienna University of Economics and Business  
Favilukis, Jack, London School of Economics and Political Science  
Fay, Scott, Syracuse University  
Fazio, Dimas, National University of Singapore  
Fazli, Amir, University of Washington  
Fe, Eduardo, University of Manchester  
Fedyk, Anastassia, University of California, Berkeley  
Fehder, Daniel, University of Southern California  
Fehrler, Sebastian, University of Bremen  
Fei, Xinyu, University of Michigan  
Feichter, Christoph, Vienna University of Economics and Business  
Feiler, Daniel, Dartmouth College  
Feinstein, Zachary, Stevens Institute of Technology

Feit, Elea, Drexel University  
Feizi, Arshya, Harvard University  
Feldhütter, Peter, Copenhagen Business School  
Feldman, Jacob, Washington University  
Feldman, Pnina, Boston University  
Feng, Ben, University of Waterloo  
Feng, Cecilia, Stony Brook University  
Feng, Guanhao, City University of Hong Kong  
Feng, Mei, University of Pittsburgh  
Feng, Yiding, University of Chicago  
Feng, Yifan, National University of Singapore  
Ferguson, John-Paul, McGill University  
Fernández-Loría, Carlos, Hong Kong University of Science and Technology  
Fernando, Duarte, Brown University  
Ferreira, Kris, Harvard Business School  
Ferri, Fabrizio, University of Miami  
Field, Laura, University of Delaware  
Figge, Patrick, University of Passau  
Filippas, Apostolos, Fordham University  
Filos-Ratsikas, Aris, University of Edinburgh  
Fiordelisi, Franco, University of Essex  
Fiorin, Stefano, Bocconi University  
Fischbacher, Urs, University of Konstanz  
Fischer, Marcel, Copenhagen Business School  
Fischer, Mira, WZB Berlin Social Science Center  
Fisher, Adlai, University of British Columbia  
Fisher, Geoffrey, Cornell University  
Fisher, Matthew, Southern Methodist University  
Fitza, M. A., University of Exeter  
Fitza, Markus, Frankfurt School of Finance & Management  
Fitzgerald, Tristan, Texas A&M University  
Flam, Rachel, London Business School  
Flaxman, Seth, Oxford University  
Fleckenstein, Matthias, University of Delaware  
Fleming, Michael, Federal Reserve Bank of New York  
Flicker, Blair, University of South Carolina  
Florackis, Chris, University of Liverpool  
Floyd, Eric, University of California, San Diego  
Foerderer, Jens, Technical University of Munich  
Foley, Sean, University of Sydney  
Folsom, David, University of Texas at El Paso  
Folta, Timothy, University of Connecticut

Fong, Christina, Carnegie Mellon University  
Fong, Hortense, Yale University  
Fong, Jessica, University of Michigan  
Fong, Nathan, Rutgers University  
Fonseca, Julia, University of Illinois Urbana-Champaign  
Fons-Rosen, Christian, University of California, Merced  
Forman, Chris, Cornell University  
Foros, Øystein, Norwegian School of Economics  
Foroughi, Pouyan, York University  
Forrest, David, University of Liverpool  
Forster, Martin, University of Bologna  
Fournier, Mathieu, University of New South Wales  
Foussoul, Ayoub, Columbia University  
Fracassi, Cesare, University of Texas at Austin  
Fradkin, Andrey, Boston University  
Frake, Justin, University of Michigan  
Fralix, Brian, Clemson University  
Francischello, Marco, Imperial College London  
Franco, Pablo, University of Manchester  
Frank, Morgan, University of Pittsburgh  
Franzoni, Francesco, Università della Svizzera Italiana  
Frazelle, Andrew, University of Texas at Dallas  
Frazier, David, Monash University  
Frederiksen, Anders, Aarhus University  
Free, Clinton, University of Sydney  
Freeman, David, Simon Fraser University  
Freeman, Kayla, University of Georgia  
Freeman, Michael, INSEAD  
Freeman, Rupert, University of Virginia  
Fresard, Laurent, University of Maryland  
Freund, Daniel, Massachusetts Institute of Technology  
Freundt, Jana, University of Fribourg  
Friebel, Guido, Goethe University  
Friedman, Elizabeth, Columbia University  
Frongillo, Rafael, University of Colorado Boulder  
Fry, Caroline, University of Hawai'i at Mānoa  
Frydman, Cary, University of Southern California  
Fu, Carolyn, Harvard Business School  
Fu, Runshan, New York University  
Fügener, Andreas, Universität zu Köln  
Fugger, Nicolas, Zentrum für Europäische Wirtschaftsforschung  
Fujii, Yoichiro, Meiji University

Fulford, Scott, Consumer Financial Protection Bureau  
Füllbrunn, Sascha, Radboud University Nijmegen  
Fulop, Andras, ESSEC Business School  
Funk, Russell, University of Minnesota  
Fusari, Nicola, Johns Hopkins University  
Fuster, Andreas, Swiss Federal Institute of Technology Lausanne  
Gadgil, Salil, U.S. Department of the Treasury  
Gaertig, Celia, University of California, Berkeley  
Gaertner, Fabio, University of Wisconsin–Madison  
Gaessler, Fabian, Max Planck Institute for Research on Collective Goods  
Gagliardi, Luisa, Bocconi University  
Gagnon, Nickolas, Aarhus University  
Gahng, Minmo, Cornell University  
Galasso, Alberto, University of Toronto  
Gallagher, Emily, University of Colorado Boulder  
Gallani, Susanna, Harvard Business School  
Gallemore, John, University of Chicago  
Gallmeyer, Michael, McIntire School of Commerce  
Gallo, Lindsey, University of Michigan  
Gamba, Andrea, University of Warwick  
Gan, Jingxing (Rowena), Southern Methodist University  
Gan, Kyra, Harvard University  
Ganco, Martin, University of Wisconsin–Madison  
Gandhi, Ashvin, University of California, Los Angeles  
Gandhi, Linnea, University of Pennsylvania  
Gandhi, Priyank, Rutgers University  
Gangadharan, Lata, Monash University  
Ganglmair, Bernhard, Zentrum für Europäische Wirtschaftsforschung  
Ganguli, Ina, University of Massachusetts Amherst  
Gangwar, Manish, Indian School of Business  
Ganju, Kartik, University of Minnesota, Twin Cities  
Gao, Buqu, Hunan University  
Gao, Cheng, University of Michigan  
Gao, Fei, Indiana University Bloomington  
Gao, Feng, Rutgers University  
Gao, Haoyu, Renmin University of China  
Gao, Huasheng, Fudan University  
Gao, Janet, Georgetown University  
Gao, Long, University of California, Riverside  
Gao, Pengjie, University of Notre Dame  
Gao, Rui, University of Texas at Austin  
Gao, Sarah Yini, Lee Kong Chian School of Business

Gao, Xiangyu, Chinese University of Hong Kong Business School  
Gao, Xuefeng, Chinese University of Hong Kong  
Gao, Zhenyu, Chinese University of Hong Kong  
Gao-Bakshi, Xiaohui, Temple University  
Garcia Lara, Juan Manuel, University Charles III of Madrid  
Garcia, Stephen, University of California, Davis  
Garcia-Appendini, Emilia, University of St. Gallen  
Garel, Alexandre, Audencia Business School  
Garfinkel, Jon, University of Iowa  
Garg, Nikhil, Cornell University  
Garg, Rajiv, Emory University  
Gargano, Antonio, University of Houston  
Gargiulo, Martin, INSEAD  
Garimella, Aravinda, University of Illinois Urbana-Champaign  
Garlappi, Lorenzo, University of British Columbia  
Garratt, Rod, University of California, Santa Barbara  
Gatignon, Aline, Wharton School of the University of Pennsylvania  
Gaudin, Germain, University of Freiburg  
Gaule, Patrick, Massachusetts Institute of Technology  
Gauriot, Romain, New York University Abu Dhabi  
Gautier, Axel, University of Liege  
Gavazzoni, Federico, BI Norwegian Business School  
Ge, Shan, New York University  
Ge, Weili, University of Washington  
Ge, Yong, University of Alabama  
Gee, Kurt, Ohio State University  
Gehrig, Thomas, University of Vienna  
Gelman, Michael, University of Delaware  
Gempesaw, David, Miami University  
Genc, Egemen, University of Illinois Chicago  
Geng, Xin, University of Miami  
Geng, Zhe, Fudan University  
Gentry, Matthew, Florida State University  
Georg, Co-Pierre, Deutsche Bundesbank  
George, Tsalis, Aarhus University  
Georgeac, Oriane, Boston University  
Georghiou, Angelos, McGill University  
Georgiadis, George, Boston University  
Gerken, William, University of Kentucky  
Germonprez, Matt, University of Nebraska–Omaha  
Gershoni, Naomi, Ben-Gurion University of the Negev  
Gerstenberg, Tobias, Stanford University

Gertsberg, Marina, University of Manchester  
Geva, Hilah, Tel Aviv University  
Geva, Tomer, Tel Aviv University  
Ghamami, Samim, University of California, Berkeley  
Ghasemkhani, Hossein, Purdue University  
Ghili, Soheil, Yale School of Management  
Ghoddusi, Hamed, California Polytechnic State University  
Ghosh, Anastasiya, University of Arizona  
Ghoshal, Abhijeet, University of Illinois Urbana-Champaign  
Giachetti, Claudio, University of Bologna  
Giacoletti, Marco, University of Southern California  
Giambona, Erasmo, Syracuse University  
Giammarino, Ron, University of British Columbia  
Giannetti, Mariassunta, Stockholm School of Economics  
Giarratana, Marco, IE Business School  
Gibbons, Brian, Oregon State University  
Gijbbrechts, Joren, Católica-Lisbon Business and Economics  
Gil-Bazo, Javier, University Pompeu Fabra  
Gilbert, Stephen, University of Texas at Austin  
Gilbukh, Sophia, Baruch College  
Gill, Andrej, Johannes Gutenberg University  
Gill, David, Purdue University  
Gill, Manpreet, University of South Carolina  
Gillingham, Kenneth, Yale University  
Giménez-Gómez, José-Manuel, Universitat Rovira i Virgili  
Gine, Xavier, World Bank  
Giorcelli, Michela, University of California, Los Angeles  
Giovannetti, Bruno, Sao Paulo School of Economics  
Gipper, Brandon, Stanford University  
Giraud-Carrier, Francois, Weber State University  
Gius, Luca, Massachusetts Institute of Technology  
Gkatzelis, Vasilis, Drexel University  
Glaeser, Chloe, University of North Carolina at Chapel Hill  
Glaeser, Stephen, University of North Carolina at Chapel Hill  
Glavas, Dejan, ESSCA School of Management  
Glebkin, Sergei, INSEAD  
Glenn, Jennifer, Ohio State University  
Glennon, Britta, University of Pennsylvania  
Glöckner, Andreas, University of Cologne  
Glossner, Simon, Federal Reserve Board  
Glover, Brent, Carnegie Mellon University  
Gneezy, Ayelet, University of California, San Diego

Goedker, Katrin, Bocconi University  
Goergen, Marc, IE Business School  
Goh, Joel, National University of Singapore  
Gokpinar, Bilal, University College London  
Goldberg, Samuel, Stanford University  
Goldenberg, Amit, Harvard Business School  
Goldfarb, Avi, University of Toronto  
Goldman, Jim, University of Warwick  
Goldman, Nathan, North Carolina State University  
Goldsmith-Pinkham, Paul, Yale University  
Goldstein, Daniel, Microsoft Research  
Goldstein, Michael, Babson College  
Goli, Ali, University of Washington  
Golin, Marta, University of Zurich  
Golinski, Adam, University of York  
Golrezaei, Negin, Massachusetts Institute of Technology  
Golubov, Andrey, University of Toronto  
Gomes, Francisco, London Business School  
Gomes, Renato, Université Toulouse Capitole  
Gomez Cram, Roberto, London Business School  
Gomez Martinez, Jonathan, Emory University  
Goncalves, Andrei, Ohio State University  
Gondhi, Naveen, INSEAD  
Gong, Jie, University of Hong Kong  
Gong, Qingbin, Shanghai Jiao Tong University  
Gong, Xiao-Yue, Carnegie Mellon University  
Gong, Xiting, Chinese University of Hong Kong  
Gong, Zheng, Chinese University of Hong Kong, Shenzhen  
Gonzalez, Angelica, University of Edinburgh  
Gonzalez, Fausto, Washington University in St. Louis  
Gonzalez-Uribe, Juanita, London School of Economics and Political Science  
Goodman, Theodore, Purdue University  
Goolsby, Craig, Harbor-UCLA Medical Center  
Gopal, Manasa, Georgia Institute of Technology  
Gopalakrishnan, Arun, Rice University  
Gopalakrishnan, Sanjith, McGill University  
Gopalan, Yadav, Indiana University  
Goraya, Sampreet, Stockholm School of Economics  
Gorbenko, Alex, University College London  
Gormley, Todd, Washington University in St. Louis  
Gormsen, Niels, University of Chicago  
Gornall, Will, University of British Columbia

Gospodinov, Nikolay, Federal Reserve Bank of Atlanta  
Gottardi, Piero, University of Essex  
Götz, Martin, Deutsche Bundesbank  
Gourier, Elise, Princeton University  
Goyal, Amit, University of Lausanne  
Goyal, Manu, University of Utah  
Goyal, Sanjeev, University of Cambridge  
Goyal, Vidhan, Hong Kong University of Science and Technology  
Goyenko, Ruslan, McGill University  
Grabner, Isabella, Vienna University of Economics and Business  
Grabowski, David, Harvard Medical School  
Graddy, Kathryn, Brandeis University  
Graddy-Reed, Alexandra, University of Southern California  
Graeber, Thomas, Harvard Business School  
Graetz, Georg, Uppsala University  
Graham, Heather, University of Michigan  
Gralla, Erica, George Washington University  
Grand-Clément, Julien, HEC Paris  
Grandi, Umberto, Université Toulouse Capitole  
Grant, Stephanie, University of Washington  
Gravel, Nicolas, Aix-Marseille University  
Gravert, Christina, Copenhagen University  
Gredil, Oleg, Tulane University  
Green, Jeremiah, Texas A&M University  
Gregoire, Vincent, HEC Montréal  
Greiner, Ben, Vienna University of Economics and Business  
Greminger, Rafael P., Tilburg University  
Grennan, Jillian, University of California, Berkeley  
Greve, Henrich, INSEAD  
Grewal, Jody, University of Toronto  
Grewal, Lauren, Dartmouth College  
Griffin, John, University of Texas at Austin  
Griffin, Thomas, Villanova University  
Grigas, Paul, University of California, Berkeley  
Grigoris, Fotis, Indiana University Bloomington  
Grigoryeva, Angelina, University of Toronto  
Groen-Xu, Moqi, Queen Mary University of London  
Groh, Matt, Massachusetts Institute of Technology  
Grohmann, Antonia, Aarhus University  
Grohsjean, Thorsten, Ludwig Maximilian University of Munich  
Groom, Ben, London School of Economics and Political Science  
Gross, Daniel, Duke University

Grosskopf, Brit, University of Exeter  
Grossman, Zachary, University of California, Merced  
Grotteria, Marco, London Business School  
Grullon, Gustavo, Rice University  
Grunewald, Andreas, University of Bonn  
Grunwald, Peter, Foundation for Dutch Scientific Research Institutes  
Gsottbauer, Elisabeth, University of Innsbruck  
Gu, Grace, University of Southern California  
Gu, Jane, University of Connecticut  
Guadalupe, Maria, INSEAD  
Guan, Yongpei, University of Florida  
Guasoni, Paolo, Dublin City University  
Gubler, Timothy, Brigham Young University  
Gudmundsson, Jens, University of Copenhagen  
Guedhami, Omrane, University of South Carolina  
Guembel, Alexander, Toulouse School of Economics  
Guest, Nick, Cornell University  
Gui, George, Columbia University  
Gui, Luyi, University of California, Irvine  
Guillen Alvarez, Pablo, University of Sydney  
Gulati, Kris, Harvard Business School  
Gulen, Huseyin, Purdue University  
Guo, Cheng, Clemson University  
Guo, Feng, Iowa State University  
Guo, Hongye, University of Hong Kong  
Guo, Hui, University of Cincinnati  
Guo, Jerry, Frankfurt School of Finance & Management  
Guo, Liang, City University of Hong Kong  
Guo, Naijia, University of Hong Kong  
Guo, Norman Xuxi, St. Louis University  
Guo, Pengfei, City University of Hong Kong  
Guo, Tianjian, University of Texas at Austin  
Guo, Tong, Duke University  
Guo, Xiaojia, University of Maryland, College Park  
Guo, Xiaomeng, Hong Kong Polytechnic University  
Guo, Xitong, Harbin Institute of Technology  
Guo, Yaohui, University of Michigan  
Guo, Yuan, Duke University  
Gupta, Abhinav, University of North Carolina at Chapel Hill  
Gupta, Aparna, Rensselaer Polytechnic Institute  
Gupta, Atul, Wharton School of the University of Pennsylvania  
Gupta, Deeksha, Carnegie Mellon University

Gupta, Nandini, Indiana University  
Gupta, Neeraja, University of Richmond  
Gupta, Pranav, University of Illinois Urbana-Champaign  
Gupta, Shivam, University of Nebraska  
Gupta, Swati, Massachusetts Institute of Technology  
Gupta, Varun, University of Chicago  
Gupta, Vishal, University of Southern California  
Gur, Yonatan, Stanford University  
Gürdal, Mehmet, Bogazici University  
Gurkan, Huseyin, ESMT Berlin  
Gustafson, Matthew, Pennsylvania State University  
Gutierrez, Cédric, Bocconi University  
Gutt, Dominik, Erasmus University Rotterdam  
Guzman, Jorge, Columbia University  
Haaland, Ingar, Norwegian School of Economics  
Haans, Richard, Erasmus University Rotterdam  
Hacamo, Isaac, Indiana University Bloomington  
Hackbarth, Dirk, Boston University  
Hadlock, Charles, Michigan State University  
Hadlock, Charles J., University of Pittsburgh  
Haeckl, Simone, University of Stavanger  
Haegele, Ingrid, University of California, Berkeley  
Haeringer, Guillaume, Baruch College  
Hagendorff, Jens, King's College London  
Hager, Sebastian, Ludwig Maximilian University of Munich  
Hagiu, Andrei, Boston University  
Hagmann, David, Hong Kong University of Science and Technology  
Hagstromer, Bjorn, Stockholm University  
Hah, Hannah, Florida International University  
Hahm, Dong Woo, University of Southern California  
Hajek, Bretislav, National University of Singapore  
Hajjhashemi, Bitan, University of Washington  
Hakenes, Hendrik, University of Bonn  
Hakimov, Rustamdjan, University of Lausanne  
Haleblian, John, University of California, Riverside  
Hales, Jeffrey, University of Texas at Austin  
Halevy, Yoram, University of Toronto  
Halford, Joseph, University of Nevada, Reno  
Haliassos, Michael, Goethe University  
Halling, Michael, University of Luxembourg  
Hallman, Nicholas, University of Texas at Austin  
Ham, Charles, Indiana University Bloomington

Hamilton, Barton, Washington University in St. Louis  
Hamilton, Michael, University of Pittsburgh  
Hamm, Sophia, Tulane University  
Hammond, Robert, University of Alabama  
Hamori, Monika, IE University  
Hampole, Menaka, Yale School of Management  
Hamstra, Melvyn, IÉSEG School of Management  
Han, Brandon, University of Maryland, College Park  
Han, Brandon Yueyang, University of Maryland, College Park  
Han, Brian, University of Illinois Urbana-Champaign  
Han, Elizabeth, McGill University  
Han, Eojin, Southern Methodist University  
Han, Kunsoo, McGill University  
Han, Larry, Harvard University  
Han, Leyla, Boston University  
Han, Ruobing, Chinese University of Hong Kong, Shenzhen  
Han, Wencui, University of Illinois Urbana-Champaign  
Han, Xiao, City University of London  
Han, Yi, Renmin University of China  
Han, Yufeng, University of North Carolina at Charlotte  
Hanaki, Nobuyuki, Osaka University  
Hanley, Kathleen, Lehigh University  
Hann, Rebecca, University of Maryland  
Hanspal, Tobin, Vienna University of Economics and Business  
Hanssens, Dominique, University of California, Los Angeles  
Haran, Uriel, Ben-Gurion University of the Negev  
Harbring, Christine, RWTH Aachen University  
Harrington, Joseph, University of Pennsylvania  
Hartline, Jason, Northwestern University  
Hartman-Glaser, Barney, University of California, Los Angeles  
Hartmann, Lorenz, University of Basel  
Harutyunyan, Mushegh, Imperial College  
Haruvy, Ernan, McGill University  
Hasan, Iftekhar, Fordham University  
Haselhuhn, Michael, University of California, Riverside  
Hashim, Matthew, University of Arizona  
Haslag, Peter, Vanderbilt University  
Hasler, Michael, University of Texas at Dallas  
Hastie, Reid, University of Chicago  
Hathaway, Brett, Brigham Young University  
Hauser, John R., Massachusetts Institute of Technology  
Hauser, Oliver, University of Exeter

Hautsch, Nikolaus, University of Vienna  
Havakhor, Taha, McGill University  
Haveman, Heather, University of California, Berkeley  
Haviv, Avery, University of Toronto  
Havranek, Thomas, Charles University in Prague  
Hawn, Olga, University of North Carolina at Chapel Hill  
Hays, Nicholas, Michigan State University  
He, Ai, University of South Carolina  
He, Alex, University of Maryland, College Park  
He, Chuan, University of Colorado Boulder  
He, Jia, Nankai University  
He, Jie, University of Georgia  
He, Jing, University of Delaware  
He, Jingyu, City University of Hong Kong  
He, Kevin, University of Pennsylvania  
He, Lisheng, Shanghai University  
He, Long, George Washington University  
He, Pu, Columbia University  
He, Qinglai, University of Wisconsin–Madison  
He, Sherry, Michigan State University  
He, Shu, University of Florida  
He, Simai, Shanghai University  
He, Tony, Rutgers University  
He, Xuedong, Chinese University of Hong Kong  
He, Ying, University of Southern Denmark  
He, Yumei, Tulane University  
Heater, John, Duke University  
Heath, Davidson, University of Utah  
Hebert, Camille, University of Toronto  
Hecht, Gary, University of Illinois Urbana-Champaign  
Heeb, Florian, Massachusetts Institute of Technology  
Heese, Jonas, Harvard Business School  
Heflin, Frank, University of Georgia  
Hegde, Deepak, New York University  
Hege, Ulrich, Toulouse School of Economics  
Heger, Stephanie, University of Bologna  
Heimer, Rawley, Arizona State University  
Heinke, Steve, Universität Basel  
Heinle, Mirko, University of Pennsylvania  
Heinrich, Timo, Hamburg University of Technology  
Heinz, Matthias, University of Cologne  
Heinzel, Christoph, Institut National de la Recherche Agronomique

Heitzman, Shane, University of Southern California  
Hellmann, Thomas, University of Oxford  
Helmers, Christian, Santa Clara University  
Helzer, Erik, Naval Postgraduate School  
Hengel, Erin, Brunel University London  
Henriksson, Matthew, University of Tennessee, Knoxville  
Henry, Emeric, Sciences Po  
Henry, Erin, University of Arkansas  
Henry, Tyler, Miami University  
Herbst, Daniel, University of Arizona  
Herings, P., Tilburg University  
Hermes, Henning, Ifo Institute for Economic Research  
Hermosilla, Manuel, Johns Hopkins University  
Hernandez, Exequiel, University of Pennsylvania  
Herpfer, Christoph, University of Virginia  
Herr, Annika, Leibniz University Hannover  
Hersh, Jonathan, Chapman University  
Hershfield, Hal, University of California, Los Angeles  
Herskovic, Bernard, University of California, Los Angeles  
Hertzel, Michael, Arizona State University  
Herz, Holger, University of Fribourg  
Hett, Florian, Johannes Gutenberg University  
Hevner, Alan, University of South Florida  
Hewitt, Max, University of Arizona  
Heyen, Daniel, University of Kaiserslautern-Landau  
Heyerdahl-Larsen, Christian, BI Norwegian Business School  
Heyes, Anthony, University of Birmingham  
Hidaji, Hooman, University of Calgary  
Higgins, Sean, Northwestern University  
Hilary, Gilles, Georgetown University  
Hildebrand, Christian, University of Geneva  
Hildreth, Angus, Cornell University  
Hill, Aaron, University of Florida  
Hill, Ryan, North Western Regional Health Authority  
Hilscher, Jens, University of California, Davis  
Himmelstein, Mark, Fordham University  
Hiraiwa, Takuya, University of Maryland, College Park  
Hirshman, Samuel, Norwegian School of Economics  
Ho, Benjamin, Vassar College  
Ho, Chad, George Washington University  
Ho, Hoa, Ludwig Maximilian University of Munich  
Ho, Ian, Tulane University

Ho, Steven, University of Nevada, Las Vegas  
Hoang, Daniel, Karlsruhe Institute of Technology  
Hoberg, Gerard, University of Southern California  
Hoberg, Kai, Kuhne Logistics University  
Hoey, Sam, University of Luxembourg  
Hoffmann, Peter, European Central Bank  
Hofmann, Christian, Ludwig Maximilian University of Munich  
Hoga, Yannick, University of Duisburg-Essen  
Hoi, Chun-Keung, Rochester Institute of Technology  
Hoisl, Karin, University of Mannheim  
Hoitash, Udi, Northeastern University  
Holburn, Guy, University of Western Ontario  
Holden, Richard, University of New South Wales  
Hollenbeck, Brett, University of California, Los Angeles  
Hollstein, Fabian, Saarland University  
Holm, Martin, University of Oslo  
Holmen, Martin, University of Gothenburg  
Holtz, David, University of California, Berkeley  
Holz, Justin, University of Michigan  
Holzhacker, Martin, Michigan State University  
Holzman, Eric, Ohio State University  
Hong, Claire, Shanghai Advanced Institute of Finance  
Hong, Fuhai, Nanyang Technological University  
Hong, Hyun, University of California, Riverside  
Hong, Jiyeon, George Mason University  
Ho-Nguyen, Nam, University of Sydney  
Honigsberg, Colleen, Stanford University  
Honka, Elisabeth, University of California, Los Angeles  
Honkanen, Pekka, University of Georgia  
Hoopes, Jeffrey, University of North Carolina at Chapel Hill  
Hora, Manpreet, Georgia Institute of Technology  
Horenstein, Alex, University of Miami  
Horton, John, Massachusetts Institute of Technology  
Hoshi, Takeo, University of Tokyo  
Hossain, Mallick, Federal Reserve Bank of Philadelphia  
Hossain, Tanjim, University of Toronto  
Hosseini, Leila, University of Houston  
Hotkar, Parshuram, Indian School of Business  
Hou, Ai, Stockholm University  
Hou, Yun, Hong Kong University of Science and Technology  
Houde, Jean-Francois, University of Wisconsin–Madison  
Hougaard, Jens, University of Copenhagen

Houston, Joel, University of Florida  
Hovakimian, Armen, Baruch College  
Howard, Philip, Wake Forest University  
Hrdlicka, Christopher, University of Washington  
Hristakeva, Sylvia, Cornell University  
Hsee, Christopher, University of Chicago  
Hsiaw, Alice, Brandeis University  
Hssaine, Chamsi, University of Southern California  
Hsu, Alex, Georgia Institute of Technology  
Hsu, Charles, Hong Kong University of Science and Technology  
Hsu, Po-Hsuan, National Tsing Hua University  
Hsu, Scott, University of Arkansas  
Hu, Bin, University of Texas at Dallas  
Hu, Danqi, Northwestern University  
Hu, Jiayin, Peking University  
Hu, Kejia, Oxford University  
Hu, Maggie, Chinese University of Hong Kong  
Hu, Ming, University of Toronto  
Hu, Xing, Tsinghua University  
Hu, Yuchen, Stanford University  
Hu, Yue, Stanford University  
Hu, Zhaolin, Tongji University  
Hu, Zhenyu, National University of Singapore  
Huang, Allen, Hong Kong University of Science and Technology  
Huang, Chong, University of California, Irvine  
Huang, Da, Northeastern University  
Huang, Dashan, Singapore Management University  
Huang, Difang, University of Hong Kong  
Huang, Guofang, Purdue University  
Huang, Henry, Yeshiva University  
Huang, Jiekun, University of Illinois Urbana-Champaign  
Huang, Jing-Zhi, Pennsylvania State University  
Huang, Junfei, Chinese University of Hong Kong  
Huang, Ke-Wei, National University of Singapore  
Huang, Nina, University of Miami  
Huang, Qianqian, City University of Hong Kong  
Huang, Rachel, National Central University  
Huang, Rihuan, Chinese University of Hong Kong, Shenzhen  
Huang, Rong, Fudan University  
Huang, Shiyang, University of Hong Kong  
Huang, Sterling, Singapore Management University  
Huang, Tingliang, University of Tennessee, Knoxville

Huang, Wenqian, Bank for International Settlements  
Huang, Xiao, Concordia University  
Huang, Ximin, University of Minnesota  
Huang, Xing, Washington University in St. Louis  
Huang, Yan, Carnegie Mellon University  
Huang, Yangguang, Hong Kong University of Science and Technology  
Huang, Yi, Fudan University  
Huang, Ying, University of Texas at Dallas  
Huang, Yufeng, University of Rochester  
Huang, Yu-Jui, University of Colorado Boulder  
Huang, Zhiyi, University of Hong Kong  
Huang, Zhiyuan, Tongji University  
Huang, Zhongwei, City University of London  
Huang, Zihong, Texas Tech University  
Huber, Christoph, Vienna University of Economics and Business  
Huber, Juergen, University of Innsbruck  
Huck, Steffen, WZB Berlin Social Science Center  
Huffman, David, University of Pittsburgh  
Huh, Yesol, Federal Reserve Board  
Hui, Kai Wai, University of Hong Kong  
Hui, Xiang, Washington University in St. Louis  
Hultgren, Andy, University of Illinois Urbana-Champaign  
Hunermund, Paul, Copenhagen Business School  
Hung, Chungyu, University of Melbourne  
Hung, Iris, Chinese University of Hong Kong  
Hung, Mingyi, Hong Kong University of Science and Technology  
Huo, Tianming, National University of Singapore  
Hupman, Andrea, University of Missouri–St. Louis  
Hurlin, Christophe, University of Orleans  
Hurst, Reuben, University of Michigan  
Hurtado-Lange, Daniela, Northwestern University  
Huseynov, Fariz, North Dakota State University  
Huszar, Zsuzsa, National University of Singapore  
Hutton, Irena, Florida State University  
Hvide, Hans, University of Bergen  
Hwang, Byoung-Hyoun, Nanyang Business School  
Hwang, Elina, University of Washington  
Hwang, Kylie, Northwestern University  
Hwang, Woonam, University of Utah  
Hyndman, Kyle, University of Texas at Dallas  
Hyoduk, Shin, University of California, San Diego  
Hyytinen, Ari, Hanken School of Economics

Ibanez, Maria, Northwestern University  
Ibrahim, Rouba, University College London  
Ichihashi, Shota, Queen's University  
Idoux, Clemence, Wharton School of the University of Pennsylvania  
Igami, Mitsuru, Yale University  
Ignatiadis, Nikolaos, University of Chicago  
Ilhan, Emirhan, National University of Singapore  
Iliev, Peter, Pennsylvania State University  
Ilk, Noyan, Florida State University  
Ilklic, Rahmi, University of Chile  
Illeditsch, Philipp, Texas A&M University  
Imai, Susumu, Hokkaido University  
Imai, Taisuke, Osaka University  
Imas, Alex, University of Chicago  
Imbet, Juan Felipe, Paris Dauphine University  
Imdahl, Christina, Eindhoven University of Technology  
Imdieke, Andrew, University of Notre Dame  
Inbar, Yael, Tel Aviv University  
Incekara Hafalir, Elif, University of Technology Sydney  
Indarte, Sasha, Wharton School of the University of Pennsylvania  
Infante, Sebastian, Federal Reserve Board  
Ingolfsson, Armann, University of Alberta  
Inostroza, Nicolas, University of Toronto  
Iorio, Alessandro, Carnegie Mellon University  
Ip, Edwin, Monash University  
Iriberry, Nagore, University of the Basque Country  
Isakov, Dusan, University of Fribourg  
Iselin, Michael, University of Minnesota, Twin Cities  
Isgin, Ebru, West Chester University  
Ishihara, Masakazu, New York University  
Ispano, Alessandro, CREST  
Israeli, Ayelet, Harvard Business School  
Israelsen, Ryan, Michigan State University  
Ivanov, Ivan, Federal Reserve Bank of Chicago  
Ivanova-Stenzel, Radosveta, Technical University Berlin  
Iyer, Krishnamurthy, University of Minnesota, Twin Cities  
Iyer, Rajkamal, Imperial College  
Jabarian, Brian, University of Chicago  
Jabr, Wael, Pennsylvania State University  
Jackwerth, Jens, University of Konstanz  
Jacob, Jagan, Xavier University  
Jacob, Martin, WHU – Otto Beisheim School of Management

Jacobs, Abigail, University of Michigan  
Jacobs, Brian, Pepperdine University  
Jacobs, Kris, McGill University  
Jacobsen, Stacey, Southern Methodist University  
Jacquillat, Alexandre, Massachusetts Institute of Technology  
Jagadish, H. V., University of Michigan  
Jago, Arthur, University of Washington Tacoma  
Jagolinzer, Alan, University of Cambridge  
Jahan-Parvar, Mohammad, Federal Reserve Board  
Jain, Aditya, Baruch College  
Jain, Lalit, University of Washington  
Jain, Nitish, London Business School  
Jame, Russell, University of Kentucky  
Janas, Moritz, New York University Abu Dhabi  
Jang, Hansol, National University of Singapore  
Jang, Yeejin, University of New South Wales  
Jannach, Dietmar, University of Klagenfurt  
Janssen, Maarten, University of Vienna  
Jasin, Stefanus, University of Michigan  
Jaske, Alan, Duke University  
Jasova, Martina, Barnard College  
Jaspersen, Johannes, Ludwig Maximilian University of Munich  
Javadekar, Apoorva, Indian School of Business  
Jayaraman, Sudarshan, University of Rochester  
Jeanneret, Alexandre, University of New South Wales  
Jedidi, Kamel, Columbia University  
Jeenas, Priit, Pompeu Fabra University  
Jenkinson, Tim, University of Oxford  
Jennings, Jared, Washington University in St. Louis  
Jens, Candace, Tulane University  
Jeon, Harriet, Wharton School of the University of Pennsylvania  
Jeon, Jihye, Boston University  
Jerath, Kinshuk, Columbia University  
Jeworrek, Sabrina, Leibniz-Institut für Wirtschaftsforschung Halle  
Ji, Shaolin, Shandong University  
Jia, Justin, University of Tennessee  
Jia, Nan, University of Southern California  
Jia, Ruizhe, Columbia University  
Jia, Yanwei, Chinese University of Hong Kong  
Jiang, Baojun, Washington University in St. Louis  
Jiang, Bo, Shanghai University  
Jiang, Erica, University of Southern California

Jiang, Fuwei, Central University of Finance and Economics  
Jiang, Fuxiu, Renmin University of China  
Jiang, Hansheng, University of Toronto  
Jiang, Hao, Michigan State University  
Jiang, Hemin, University of Science and Technology of China  
Jiang, Jiashuo, Hong Kong University of Science and Technology  
Jiang, John, Michigan State University  
Jiang, Liang, Fudan University  
Jiang, Like, University of Melbourne  
Jiang, Shushu, National University of Singapore  
Jiang, Wenxi, Chinese University of Hong Kong  
Jiang, Yangzi, Northwestern University  
Jiang, Zhaohui (Zoey), Carnegie Mellon University  
Jiang, Zhengyang, Northwestern University  
Jiang, Zhenling, Wharton School of the University of Pennsylvania  
Jiao, Wen, University of Exeter  
Jin, Chen, National University of Singapore  
Jin, Fujie, Indiana University Bloomington  
Jin, Ginger, University of Maryland, College Park  
Jin, Jenny, Chinese University of Hong Kong  
Jin, Lawrence, Cornell University  
Jin, Wang, Stanford University  
Jin, Xingye, Central University of Finance and Economics  
Jindal, Pranav, Indian School of Business–Mohali  
Jing, Bing, Cheung Kong Graduate School of Business  
Jing, Wu, Tsinghua University  
John, Anett, University of Birmingham  
Johnson, Bret, George Mason University  
Johnson, Garrett, Boston University  
Johnson, Justin, Cornell University  
Johnson, Timothy, University of Illinois Urbana-Champaign  
Johnson, Travis, University of Texas at Austin  
Jonasson, Jonas, Massachusetts Institute of Technology  
Jones, Christopher, University of Southern California  
Jones, Daniel, University of Pittsburgh  
Joo, Joonhwi, University of Texas at Dallas  
Joo, Mingyu, University of California, Riverside  
Joos, Peter, INSEAD Asia Campus  
Joshi, Priyanka, San Francisco State University  
Joshi, Yogesh, University of Maryland  
Jostova, Gergana, George Washington University  
Jotikasthira, Chotibhak, Southern Methodist University

Joukov, Artem Mikhailovich, University of Texas at Dallas  
Juárez, Rubén, University of Hawai'i at Mānoa  
Jue-Rajasingh, Diana, Rice University  
Julio, Brandon, University of Oregon  
Jung, Boochun, University of Hawai'i at Mānoa  
Jung, Michael, University of Delaware  
Jung, Minah, New York University  
Jussupow, Ekaterina, University of Mannheim  
Kabir, Poorya, National University of Singapore  
Kabra, Ashish, University of Maryland, College Park  
Kacperczyk, Olenka, London Business School  
Kadyrzhanova, Dalida, Board of Governors of the Federal Reserve System  
Kagan, Evgeny, Johns Hopkins University  
Kahale, Nabil, ESCP Business School  
Kahle, Kathleen, University of Arizona  
Kahn, Andrew, Bain & Company Chicago  
Kahraman, Bige, University of Oxford  
Kakhbod, Ali, University of California, Berkeley  
Kalay, Alon, Columbia University  
Kalayci, Kenan, University of Queensland  
Kalcheva, Ivalina, University of Texas at San Antonio  
Kalda, Ankit, Indiana University Bloomington  
Kalkanci, Basak, Georgia Institute of Technology  
Kallus, Nathan, Cornell Tech  
Kalnina, Ilze, North Carolina State University  
Kalpathy, Swaminathan, Texas Christian University  
Kalyanam, Kirthi, Santa Clara University  
Kamalahmadi, Masoud, University of Miami  
Kamble, Vijay, University of Illinois Chicago  
Kamdar, Rupal, Indiana University  
Kamiya, Shinichi, Nanyang Business School  
Kampkötter, Patrick, University of Tübingen  
Kandrac, John, Federal Reserve Board  
Kang, Hyo, University of Southern California  
Kang, Wanmo, Korea Advanced Institute of Science & Technology  
Kankanhalli, Shreya, Cornell University  
Kannan, P. K., University of Maryland, College Park  
Kannan, Sampath, University of Pennsylvania  
Kanoria, Yash, Columbia University  
Kantak, Preetesh, Indiana University Bloomington  
Kanze, Dana, London Business School  
Kao, Jennifer, University of California, Los Angeles

Kapadia, Nishad, Tulane University  
Kaplan, Zachary, Washington University in St. Louis  
Kapoor, Sacha, Erasmus University Rotterdam  
Kaps, Christian, Wharton School of the University of Pennsylvania  
Kar, Wreetabrata, Purdue University  
Karabulut, Yigitcan, Frankfurt School of Finance & Management  
Karacaoglu, Nil, Northwestern University  
Karagozoglu, Emin, Bilkent University  
Karakas, Oguzhan, University of Cambridge  
Kardas, Michael, Northwestern University  
Karehnke, Paul, ESCP Business School  
Karelaia, Natalia, INSEAD  
Kargar, Mahyar, University of Illinois Urbana-Champaign  
Karle, Heiko, Frankfurt School of Finance & Management  
Karmarkar, Uma, University of California, San Diego  
Karmegam, Sabari Rajan, George Mason University  
Karolyi, Stephen, Office of the Comptroller of the Currency  
Karplus, Valerie, Carnegie Mellon University  
Kashaev, Nail, University of Western Ontario  
Katic, Ivana, Yale School of Management  
Katuscak, Peter, RWTH Aachen University  
Kaufmann, Marc, Central European University  
Kaul, Aseem, University of Minnesota, Twin Cities  
Kaul, Rupali, INSEAD  
Kaustia, Markku, Aalto University  
Kawaguchi, Kohei, Hong Kong University of Science and Technology  
Kayis, Enis, Özyeğin University  
Kaynar, Nur, University of California, Los Angeles  
Kazaz, Burak, Syracuse University  
Ke, Bin, National University of Singapore  
Ke, Shaowei, University of Michigan  
Ke, T. Tony, Chinese University of Hong Kong  
Keck, Steffen, University of Vienna  
Kedia, Simi, Rutgers University  
Keister, Todd, Rutgers University  
Keller, J. R., Cornell University  
Kelley, Eric, University of Arizona  
Kelly, Peter, University of Notre Dame  
Keloharju, Matti, Aalto University  
Kemel, Emmanuel, HEC Paris  
Kempe, David, University of Southern California  
Kempf, Elisabeth, Harvard Business School

Kennedy, Edward, Carnegie Mellon University  
Kepler, John, Stanford Graduate School of Business  
Keppler, Samantha, University of Michigan  
Keppo, Jussi, National University of Singapore  
Kerimov, Süleyman, Stanford University  
Kerr, Sari, Wellesley College  
Kerschbamer, Rudolf, University of Innsbruck  
Keskin, N. Bora, Duke University  
Kesler, Reinhold, University of Zurich  
Kesselheim, Thomas, Universität Bonn  
Kesten, Onur, University of Sydney  
Kettunen, Janne, George Washington University  
Keum, Daniel, Columbia University  
Keusch, Thomas, INSEAD  
Keyvanshokoh, Esmaeil, Texas A&M University  
Khadjavi, Menusch, Vrije Universiteit Amsterdam  
Khalil, Umair, Monash University  
Khan, Sarfraz, University of Louisiana at Lafayette  
Khanjari, Neda, Rutgers University  
Khanna, Gaurav, University of California, San Diego  
Khapko, Mariana, University of Toronto  
Khashabi, Pooyan, Ludwig Maximilian University of Munich  
Khern-Am-Nuai, Warut, McGill University  
Khir, Reem, Purdue University  
Khojandi, Anahita, University of Tennessee, Knoxville  
Khorrami, Paymon, Imperial College  
Kick, Thomas, Deutsche Bundesbank  
Kielty, Patrick, Ohio State University  
Kilic, Mete, University of Southern California  
Kim, Anthony, Amazon.com  
Kim, Antino, Indiana University Bloomington  
Kim, Byung-Cheol, University of Alabama  
Kim, Chongho, Seoul National University  
Kim, Donggyu, Korea Advanced Institute of Science & Technology  
Kim, Do Yoon, Boston College  
Kim, Eunhee, Baruch College  
Kim, Heeyon, Cornell University  
Kim, Hyung Joo, Federal Reserve Board  
Kim, Hyunjin, INSEAD  
Kim, Incheol, University of Texas Rio Grande Valley  
Kim, Jaewoo, University of Oregon  
Kim, J. Daniel, Wharton School of the University of Pennsylvania

Kim, Jinhwan, Stanford Graduate School of Business  
Kim, Jin-Hyuk, University of Colorado Boulder  
Kim, Jung Min, Northwestern University  
Kim, Keongtae, Chinese University of Hong Kong  
Kim, Kyonghee, Michigan State University  
Kim, Kyoung-Kuk, Korea Advanced Institute of Science and Technology  
Kim, Minjae, Rice University  
Kim, Minkyung, Carnegie Mellon University  
Kim, Minyoung, University of Kansas  
Kim, Ryan, Johns Hopkins University  
Kim, Sehoon, University of Florida  
Kim, Sehwa, Columbia University  
Kim, Seil, Baruch College  
Kim, Soohun, Korea Advanced Institute of Science & Technology  
Kim, Soomi, Columbia University  
Kim, Sungjin, University of Hawai'i at Mānoa  
Kim, Sunyoung, Monash University  
Kim, Taeho, University of Toronto  
Kim, Tongil "Ti", University of Texas at Dallas  
Kim, Yewon, Stanford University  
Kim, Yongjun, University of Seoul  
Kim, Youngsoo, University of Alabama  
Kimbrough, Erik, Chapman University  
Kinch, Michelle, Dartmouth College  
King, Andrew, Boston University  
King, Brayden, Northwestern University  
King, Marissa, University of Pennsylvania  
Kini, Omesh, Georgia State University  
Kinias, Zoe, INSEAD Asia Campus  
Kinnan, Cynthia, Tufts University  
Kircher, Tobias, Technical University of Munich  
Kirchler, Michael, University of Innsbruck  
Kireyev, Pavel, INSEAD  
Kirgios, Erika, University of Chicago  
Kirk, Marcus, University of Florida  
Kirshner, Samuel, University of New South Wales  
Kitchens, Brent, University of Virginia  
Kizilcec, René, Cornell University  
Klasa, Sandy, University of Arizona  
Klein, April, New York University  
Klein, Nadav, INSEAD  
Klein, Timo, Utrecht University

Kleiner, Kristoph, Indiana University  
Klijn, Flip, Spanish National Research Council  
Klingebiel, Ronald, Frankfurt School of Finance & Management  
Klingler, Sven, BI Norwegian Business School  
Klockmann, Victor, University of Würzburg  
Kneeland, Madeline, Babson College  
Knight, Samsun, University of Toronto  
Knudsen, Thorbjorn, University of Southern Denmark  
Ko, Chiu, Chinese University of Hong Kong  
Kocak, Ozgecan, Emory University  
Koch, Alexander, Aarhus University  
Koch, Andrew, University of Pittsburgh  
Koch, Christopher, Johannes Gutenberg University  
Koçyiğit, Çağıl, University of Luxembourg  
Koenig, Philipp, Deutsche Bundesbank  
Kogan, Shimon, Reichman University  
Koh, Boon Han, University of Exeter  
Koh, Tat Koon, Hong Kong University of Science and Technology  
Koharki, Kevin, Purdue University  
Kojima, Fuhito, University of Tokyo  
Kolasinski, Adam, Texas A & M University  
Kolay, Sreya, State University of New York  
Kölbel, Julian, University of St. Gallen  
Kolev, Julian, U.S. Patent and Trademark Office  
Kolev, Kalin, Baruch College  
Kolokolov, Aleksey, Goethe University  
Kong, Dongmin, Huazhong University of Science and Technology  
Kong, Guangwen, Temple University  
Kong, Lei, University of Alabama  
Kong, Xinbing, Nanjing Audit University  
König-Kersting, Christian, University of Innsbruck  
Koning, Rembrand, Harvard Business School  
Kontz, Chris, Stanford Graduate School of Business  
Koo, David, George Mason University  
Koo, Wesley, Johns Hopkins University  
Kopanyi-Peuker, Anita, Radboud University Nijmegen  
Kopytov, Alexandr, University of Hong Kong  
Koren, Moran, Stanford University  
Korevaar, Matthijs, Erasmus University Rotterdam  
Korgaonkar, Sanket, University of Virginia  
Körpeoğlu, Ersin, University College London  
Korteweg, Arthur, Stanford University

Koskinen, Yrjo, University of Calgary  
Kostami, Vasiliki, HEC Paris  
Kostovetsky, Leonard, Baruch College  
Kosyakova, Tetyana, Frankfurt School of Finance & Management  
Kotsadam, Andreas, Ragnar Frisch Centre  
Kotter, Jason, Brigham Young University  
Kouout, Kristine, Stanford University  
Kouwenberg, Roy, Mahidol University  
Kovacs, Balazs, Yale University  
Kovner, Anna, Federal Reserve Bank of New York  
Kozak, Serhiy, University of Maryland, College Park  
Kraemer, Jan, University of Passau  
Kraft, Andreas, University of Chicago  
Kraft, Pepa, HEC Paris  
Kraft, Tim, North Carolina State University  
Krajbich, Ian, Ohio State University  
Kräkel, Matthias, University of Bonn  
Krause, Ryan, Texas Christian University  
Krawczyk, Michal, University of Warsaw  
Kremens, Lukas, University of Washington  
Kremer, Mirko, Frankfurt School of Finance & Management  
Krepely Pool, Veronika, Vanderbilt University  
Kretschmer, Tobias, Ludwig Maximilian University of Munich  
Krieger, Joshua, Harvard Business School  
Krishnamoorthy, Anand, University of Central Florida  
Kristal, Ariella, Columbia University  
Kroer, Christian, Columbia University  
Kronlund, Mathias, Tulane University  
Kruger, Samuel, University of Texas at Austin  
Krutli (lu), Mathias, Indiana University Bloomington  
Kryscynski, David, University of Michigan  
Kuang, Jason, Georgia Institute of Technology  
Kuang, Yu Flora, University of Manchester  
Kube, Sebastian, University of Bonn  
Kubic, Matt, University of Texas at Austin  
Kubick, Thomas, University of Nebraska–Lincoln  
Kucukgul, Can, Rutgers University  
Kucukyavuz, Simge, Northwestern University  
Kuehn, Lars-Alexander, Carnegie Mellon University  
Kuhn, Michael, University of Oregon  
Kuiper, Alex, University of Virginia  
Kujansuu, Essi, Universität Innsbruck

Kulchina, Elena, North Carolina State University  
Kumar, Alok, University of Miami  
Kumar, Anil, Federal Reserve Bank of Dallas  
Kumar, Madhav, Massachusetts Institute of Technology  
Kumar, Naveen, University of Oklahoma  
Kumar, Praveen, University of Houston  
Kumar, Rachitesh, Columbia University  
Kundu, Amrita, Georgetown University  
Kundu, Shohini, University of California, Los Angeles  
Kung, Edward, California State University, Northridge  
Künneke, Judith, Tilburg University  
Kuong, John, INSEAD  
Kupfer, Ann-Kristin, Karlsruhe Institute of Technology  
Kuppuswamy, Venkat, Northeastern University  
Kurtzman, Robert, Federal Reserve Board  
Kush, Jonathan, University of Massachusetts Dartmouth  
Kushwaha, Tarun, University of Wisconsin–Madison  
Kusterer, David, University of Cologne  
Kuzmina, Olga, New Economic School  
Kuzu, Kaan, University of Wisconsin–Milwaukee  
Kwan, Alan, University of Hong Kong  
Kwasnica, Tony M., Pennsylvania State University  
Kwon, Caleb, Harvard Business School  
Kwon, Hyeokkoo Eric, Nanyang Technological University  
Kwon, Spencer, Harvard University  
Kyung, Nakyung, National University of Singapore  
Laber, Eric, Duke University  
Labro, Eva, University of North Carolina at Chapel Hill  
Lacetera, Nicola, University of Toronto Mississauga  
Laeven, Luc, European Central Bank  
Lagaras, Spyridon, University of Pittsburgh  
Lagzi, Saman, University of North Carolina at Chapel Hill  
Lagziel, David, Ben-Gurion University of the Negev  
Lalor, John, University of Notre Dame  
Lam, Henry, Columbia University  
Lam, H. Tai, University of California, Los Angeles  
Lam, Wing Man Wynne, University of East Anglia  
Lambert, Brittany, Indiana University  
Lambert, Thomas, Erasmus University  
Lamoreaux, Phil, Arizona State University  
Lan, Yanfei, Tianjin University  
Landry, Peter, University of Toronto

Landsman, Wayne, University of North Carolina at Chapel Hill  
Lane, Jacqueline, Harvard University  
Lane, Tom, University of Nottingham Ningbo China  
Lang, Matthias, Ludwig Maximilian University of Munich  
Langberg, Nisan, Tel Aviv University  
Langer, Nishtha, Rensselaer Polytechnic Institute  
Lanteri, Andrea, Duke University  
Lanzani, Giacomo, Massachusetts Institute of Technology  
Lariviere, Martin, Northwestern University  
Larkin, Yelena, York University  
Larocque, Stephannie, University of Notre Dame  
Larrain, Mauricio, Pontificia Universidad Católica de Chile  
Lassance, Nathan, Université Catholique de Louvain  
Laudenbach, Christine, Leibniz Institute for Financial Research  
Lauga, Dominique, University of Cambridge  
Laurion, Henry, University of Colorado Boulder  
Laursen, Keld, Copenhagen Business School  
Laussel, Didier, GREQAM  
Lavastida, Thomas, University of Texas at Dallas  
Laviers, Lisa, Tulane University  
Law, Kelvin, Nanyang Business School  
Lawrence, Megan, Harvard Business School  
Lawson, Asher, INSEAD  
Lazarus, Eben, University of California, Berkeley  
Lé, Mathias, Banque de France  
Le Barbanchon, Thomas, Bocconi University  
Lebovitz, Sarah, University of Virginia  
Leduc, Matthew, Paris School of Economics  
Lee, Brian, Pennsylvania State University  
Lee, Chul Ho, Korea Advanced Institute of Science and Technology  
Lee, Dokyun, Boston University  
Lee, Donald, Yale University  
Lee, Gene Moo, University of British Columbia  
Lee, Hae Kang, University of South Carolina  
Lee, Heemin, Baruch College  
Lee, Heeseung Andrew, University of Texas at Dallas  
Lee, Hyun Seok (Huck), Korea University Business School  
Lee, Hyunkyung, Emory University  
Lee, Ilbin, University of Alberta  
Lee, Jongsub, Seoul National University  
Lee, Josh, Brigham Young University  
Lee, Jung Hoon, Vanderbilt University

Lee, Kevin, University of British Columbia  
Lee, Kyuhan, Arizona State University  
Lee, Kyungran, University of Hong Kong  
Lee, Leonard, National University of Singapore  
Lee, Lian Fen, Boston College  
Lee, Michael, Federal Reserve Bank New York  
Lee, Michael, University of California, Irvine  
Lee, Mina, Washington University in St. Louis  
Lee, Narae, Korea Advanced Institute of Science & Technology  
Lee, Suzanne, Georgia Institute of Technology  
Lee, Taewoo, University of Pittsburgh  
Lefort, Jean-Philippe, Paris Dauphine University  
Lefouili, Yassine, Toulouse School of Economics  
Lehar, Alfred, University of Calgary  
Lehman, David, University of Virginia  
Lei, Murray, Queen's University  
Lei, Xiao, University of Hong Kong  
Leibbrandt, Andreas, Monash University  
Leider, Stephen, University of Michigan  
Leisten, Matthew, Federal Trade Commission  
Leitner, Yaron, Washington University in St. Louis  
Lekwijit, Suparerk, Arizona State University  
Lem, Katie, Ohio State University  
Le Mens, Gael, Pompeu Fabra University  
Le Moglie, Marco, Università Cattolica del Sacro Cuore  
Leng, Yan, University of Texas at Austin  
Lenzu, Simone, New York University  
Leo, Greg, Vanderbilt University  
Leone, Andrew, Northwestern University  
Leonelli, Sinja, University of Chicago  
Leonello, Agnese, European Central Bank  
Lepper, Marissa, Texas A&M University  
Lerman, Alina, University of Connecticut  
Lerner, Sven, Stanford University  
Leshno, Jacob, University of Chicago  
Lester, Rebecca, Stanford University  
Leung, Benson Tsz Kin, Hong Kong Baptist University  
Leung, Ming, University of California, Irvine  
Levari, David, Harvard Business School  
Levav, Jonathan, Stanford University  
Levi, Retsef, Massachusetts Institute of Technology  
Levin, Asaf, Technion – Israel Institute of Technology

Levin, Daniel, Rutgers University  
Levine, Emma, University of Pennsylvania  
Levine, Julia, Johns Hopkins University  
Levine, Oliver, University of Wisconsin–Madison  
Levine, Ross, Stanford University  
Levy, Moshe, Hebrew University of Jerusalem  
Lewandowski, Michal, Warsaw School of Economics  
Lewis, Demetrius, University of California, Riverside  
Lewis, Joshua, University of Pennsylvania  
Lewis, Ryan, University of Colorado Boulder  
Leyden, Benjamin, Cornell University  
Leymarie, Jeremy, EDHEC Business School  
Leyton-Brown, Kevin, University of British Columbia  
L'Haridon, Olivier, University of Rennes  
Li, Alice, Ohio State University  
Li, Allen, London Business School  
Li, Andrew, Carnegie Mellon University  
Li, Anran, Chinese University of Hong Kong  
Li, Anran, Northwestern University  
Li, Bin, Wuhan University  
Li, Bo, Tsinghua University  
Li, Cha, University of Texas at Austin  
Li, Chan, University of Kansas  
Li, Chengzhang, Shanghai Jiao Tong University  
Li, Chenxu, Peking University  
Li, Congcong, Duquesne University  
Li, Cuihong, University of Connecticut  
Li, Dan, Chinese University of Hong Kong, Shenzhen  
Li, Danyang, Hofstra University  
Li, Duoze, Chinese University of Hong Kong  
Li, Erica, Cheung Kong Graduate School of Business  
Li, Fei, University of North Carolina  
Li, Frank, Stanford University  
Li, Guangrui (Kayla), York University  
Li, Hannah, Massachusetts Institute of Technology  
Li, Harrison, Stanford University  
Li, He, Clemson University  
Li, Hongyi, University of New South Wales  
Li, Hui, Hong Kong University Business School  
Li, Jay, University of North Carolina at Greensboro  
Li, Jiacui, University of Utah  
Li, Jian, Iowa State University

Li, Jian (Jane), Columbia University  
Li, Jianpei, University of International Business and Economics  
Li, Jiasun, George Mason University  
Li, Jie, Shanghai Advanced Institute of Finance  
Li, Jin, University of Hong Kong  
Li, Jingjing, University of Virginia  
Li, Jun, University of Texas at Dallas  
Li, Jun, University of Michigan  
Li, Kai, Peking University  
Li, Kathleen, University of Texas at Austin  
Li, Krista, Indiana University  
Li, Lei, Purdue University  
Li, Lingfang (Ivy), Fudan University  
Li, Lingfei, Chinese University of Hong Kong  
Li, Meng, University of Oklahoma  
Li, Michael, Harvard Business School  
Li, Nan, University of Toronto  
Li, Ningzhong, University of Texas at Dallas  
Li, Pan, Georgia Institute of Technology  
Li, Rachel, University of Alabama  
Li, Shelley, University of Southern California  
Li, Shihan, Carnegie Mellon University  
Li, Shuaiqi, London School of Economics and Political Science  
Li, Shukai, Northwestern University  
Li, Simin, Tulane University  
Li, Siqi, Santa Clara University  
Li, Sophia Zhengzi, Rutgers University  
Li, Tao, University of Florida  
Li, Tianyi, Massachusetts Institute of Technology  
Li, Ting, Erasmus University  
Li, Wenchao, National University of Singapore  
Li, Xi, University of Hong Kong  
Li, Xi, London School of Economics and Political Science  
Li, Xi, University of Reading  
Li, Xia, Boston University  
Li, Xiaobo, National University of Singapore  
Li, Xiaocheng, Imperial College  
Li, Xilin, University of Chicago  
Li, Xitong, HEC Paris  
Li, Xu, University of Hong Kong  
Li, Yao, Southern University of Science and Technology  
Li, Ye, University of California, Riverside

Li, Ye, University of Washington  
Li, Yifu, University of Science and Technology of China  
Li, Yinghua, Arizona State University  
Li, Yingying, Hong Kong University of Science and Technology  
Li, Yiwen, Villanova University  
Li, Yuanchen, Tongji University  
Li, Yue, University at Albany  
Li, Yuexin, Renmin University of China  
Li, Yuexing, Johns Hopkins University  
Li, Zhao, New York University  
Li, Zhepeng, University of Hong Kong  
Li, Zhonglin, National University of Singapore  
Li, Zhuoxin (Allen), University of Wisconsin–Madison  
Li, Zhuozheng, Shanghai University  
Lian, Zhen, Yale University  
Liang, Bing, University of Massachusetts  
Liang, Chen, University of Connecticut  
Liang, Chuchu, University of California, Irvine  
Liang, Jason, Massachusetts Institute of Technology  
Liang, Yi, University of Virginia  
Liang, Ying, Georgia State University  
Liang, Yucheng, Carnegie Mellon University  
Liao, Chenxi, Chinese University of Hong Kong  
Liao, Guanmin, Renmin University of China  
Liao, Scott, University of Toronto  
Liaukonyte, Jura, Cornell University  
Libby, Theresa, University of Waterloo  
Lie, Erik, University of Iowa  
Liebersohn, Jack, University of California, Irvine  
Light, Bar, Stanford University  
Lill, Jeremy, University of Kansas  
Lim, Jong Myeong, University of Miami  
Lim, Michael, Seoul National University  
Lim, Stanley, Michigan State University  
Lim, Wooyoung, Hong Kong University of Science and Technology  
Lim, Yun Fong, Singapore Management University  
Limodio, Nicola, Bocconi University  
Lin, Danmo, University of Warwick  
Lin, Haijin, University of Houston  
Lin, Haizhen, Indiana University  
Lin, Leming, University of Pittsburgh  
Lin, Meichun, Singapore Management University

Lin, Mingfeng, Georgia Institute of Technology  
Lin, Qihang, University of Iowa  
Lin, Shaochong, University of Hong Kong  
Lin, Shu, Chinese University of Hong Kong  
Lin, Song, Hong Kong University of Science and Technology  
Lin, Tesary, Boston University  
Lin, Tse-Chun, University of Hong Kong  
Lin, Wei, Chinese University of Hong Kong, Shenzhen  
Lin, Wilson, Santa Clara University  
Lin, Xiaoji, University of Minnesota  
Lin, Yifan, Georgia Institute of Technology  
Lin, Yu-Kai, Georgia State University  
Lin, Yunduan, University of California, Berkeley  
Lin, Yupeng, National University of Singapore  
Linde, Jona, Maastricht University  
Lindsay, Luke, University of Exeter  
Lindsey, Bradley, Utah State University  
Ling, Zhejia, California State University, Fullerton  
Linos, Elizabeth, Harvard University  
Lisic, Ling, Virginia Tech  
Liu, Ben, City University of Hong Kong  
Liu, Che-Wei, Indiana University Bloomington  
Liu, Chuanren, University of Tennessee  
Liu, Clark, Tsinghua University  
Liu, Dengpan, Tsinghua University  
Liu, Elain, University of Houston  
Liu, Jia, Hong Kong University of Science and Technology  
Liu, Jiayi, Virginia Tech  
Liu, Jingchen, Renmin University of China  
Liu, Junqi, Xiamen University  
Liu, Laura Xiaolei, Peking University  
Liu, Lisa, Columbia University  
Liu, Lydia, Cornell University  
Liu, Meng, Washington University in St. Louis  
Liu, Mingwei, Rutgers University  
Liu, Nan, Boston College  
Liu, Qihong, University of Oklahoma  
Liu, Shannon, University of Toronto  
Liu, Sheng, University of Toronto  
Liu, Shuo, Peking University  
Liu, Tingting, Iowa State University  
Liu, Tong, Massachusetts Institute of Technology

Liu, Xiao, New York University  
Liu, Xiao, Arizona State University  
Liu, Xiaoding, Texas A&M University  
Liu, Xiaojin, Virginia Commonwealth University  
Liu, Xin, Renmin University of China  
Liu, Xin, Australian National University  
Liu, Xuewen, Hong Kong University of Science and Technology  
Liu, Yan, Hong Kong Polytechnic University  
Liu, Yan, Purdue University  
Liu, Yang, University of Hong Kong  
Liu, Yi, University of Wisconsin–Madison  
Liu, Yihao, University of Illinois Urbana-Champaign  
Liu, Yukun, University of Rochester  
Liu, Yunan, North Carolina State University  
Liu, Yunchuan, University of Illinois Urbana-Champaign  
Liu, Zhe, Imperial College  
Liu, Zhenqi (Jessie), Johns Hopkins University  
Ljubic, Ivana, ESSEC Business School  
Lluent, Tatiana, ESMT Berlin  
Lo, Alvis, Boston College  
Lo, Irene, Stanford University  
Lo, Jade, Drexel University  
Lo, Venus, City University of Hong Kong  
Loaiza-Maya, Rubén, Monash University  
Lobo, Miguel, INSEAD Asia Campus  
Lochstoer, Lars, Columbia University  
Lock, Brandon, Baruch College  
Lockhart, Brandon, Clemson University  
Lockwood, Benjamin, Wharton School of the University of Pennsylvania  
Loeffler, Charles, University of Pennsylvania  
Loehndorf, Nils, University of Luxembourg  
Loewenstein, Mark, University of Maryland  
Loftus, Serena, Kent State University  
Loh, Roger, Singapore Management University  
Lohse, Tim, Berlin School of Economics and Law  
Londono, Juan M., Federal Reserve Board of Governors  
Long, Fei, Columbia University  
Long, Wang, Fudan University  
Long, Xiaoyang, University of Wisconsin–Madison  
Long, Zhuoyu, Chinese University of Hong Kong  
Lopez, Luis, University of Illinois Chicago  
Lopez-Lira, Alejandro, University of Florida

Lou, Bowen, University of Connecticut  
Lou, Xiaoxia, University of Delaware  
Loualiche, Erik, University of Minnesota  
Loudis, Johnathan, University of Notre Dame  
Loumrioti, Maria, University of Texas at Dallas  
Lount, Robert, Ohio State University  
Lourenço, Sofia, Lisbon School of Economics and Management  
Lourie, Ben, University of California, Irvine  
Lovett, Mitchell, University of Rochester  
Low, Angie, Nanyang Business School  
Low, Corinne, Wharton School of the University of Pennsylvania  
Lowery, J., University of Texas at Austin  
Lowrey, John, Northeastern University  
Lowry, Michelle, Drexel University  
Lu, Fangzhou, University of Hong Kong  
Lu, Hai, University of Toronto  
Lu, Jackson, Massachusetts Institute of Technology  
Lu, Jinzhi, City University of Hong Kong  
Lu, Lijian, Hong Kong University of Science and Technology  
Lu, Mengshi, Purdue University  
Lu, Michelle, China Europe International Business School  
Lu, Runjing, University of Alberta  
Lu, Shijie, University of Notre Dame  
Lu, Shirley, Harvard Business School  
Lu, Tao, University of Connecticut  
Lu, Tian, Arizona State University  
Lu, Tong, University of Houston  
Lu, Wei, University of Toronto  
Lu, Xiaomeng, Fudan University  
Lu, Yao, Cornell University  
Lu, Yingda, Rensselaer Polytechnic Institute  
Lu, Yiqing, New York University Shanghai  
Lu, Yixin, George Washington University  
Lu, Zhongjin, University of Georgia  
Lu, Zhuoran, Fudan University  
Lubik, Thomas, Federal Reserve Bank of Richmond  
Luca, Michael, Harvard Business School  
Lucas, Brian, Cornell University  
Luck, Stephan, Federal Reserve Bank of New York  
Luedtke, James, University of Wisconsin–Madison  
Luehrmann, Melanie, Royal Holloway, University of London  
Lugovoi, Ivan, Kuhne Logistics University

Lunawat, Radhika, University of California, Irvine  
Luo, Bowen, University of Houston  
Luo, Danqi, University of California, San Diego  
Luo, Hong, Harvard Business School  
Luo, Jiang, Nanyang Technological University  
Luo, Jiao, University of Minnesota  
Luo, Jun, Shanghai Jiao Tong University  
Luo, Qi, Clemson University  
Luo, Yiyun, University of North Carolina at Chapel Hill  
Lykouris, Thodoris, Massachusetts Institute of Technology  
Lynch, John, University of Colorado Boulder  
Lynch-Levy, Bradford, University of Pennsylvania  
Lyons, Liz, University of California, San Diego  
Lysyakov, Mikhail, University of Maryland, College Park  
Lyu, Guodong, Hong Kong University of Science and Technology  
Ma, Guang, McGill University  
Ma, Hongyao, Columbia University  
Ma, Kebin, University of Warwick  
Ma, Liye, University of Maryland  
Ma, Mark, University of Pittsburgh  
Ma, Paul, University of Minnesota  
Ma, Song, Yale University School of Management  
Ma, Tao, Texas Tech University  
Ma, Wenting, University of Massachusetts Amherst  
Ma, Will, Columbia University  
Ma, Xiao, Peking University  
Ma, Xinyu, University of Pennsylvania  
Ma, Yiming, Columbia University  
Ma, Yujing, University of International Business and Economics  
Maas, Wim, Tilburg University  
Macchiavelli, Marco, University of Massachusetts Amherst  
Macciocchi, Daniele, University of Miami  
MacGarvie, Megan, Boston University  
Macias, Antonio, Baylor University  
Macis, Mario, Johns Hopkins University  
MacKay, Alexander, Harvard University  
MacKinlay, Andrew, Virginia Tech  
Macnamara, Gregory, Meta Platforms, Inc.  
Maddah, Bacel, American University of Beirut  
Madio, Leonardo, University of Padova  
Madsen, Joshua, University of Minnesota, Twin Cities  
Madureira, Leonardo, Case Western Reserve University

Mahieux, Lucas, Tilburg University  
Mahlendorf, Matthias, Frankfurt School of Finance & Management  
Mahmoud, Ola, University of St. Gallen  
Mahrt-Smith, Jan, University of Toronto  
Mai, Feng, Stevens Institute of Technology  
Mai, Yunke, University of Kentucky  
Maines, Laureen, Indiana University  
Mak, Ho-Yin, Georgetown University  
Mak, Vincent, University of Cambridge  
Makhdoumi, Ali, Duke University  
Maksymov, Eldar, Arizona State University  
Malekian, Azarakhsh, University of Toronto  
Malenko, Andrey, University of Michigan  
Malenko, Nadya, University of Michigan  
Malherbe, Frederic, University College London  
Malik, Nikhil, University of Southern California  
Malik, Sara, University of Utah  
Malinova, Katya, McMaster University  
Malkoc, Selin, Ohio State University  
Mallapragada, Girish, Indiana University  
Mallipeddi, Rakesh, Ohio State University  
Mamadehussene, Samir, University of Texas at Dallas  
Mamaysky, Harry, Columbia University  
Manconi, Alberto, Bocconi University  
Mani, Ankur, University of Minnesota  
Mani, Vidya, University of Virginia  
Manjunath, Vikram, University of Ottawa  
Mankad, Shawn, North Carolina State University  
Mann, William, Emory University  
Manso, Gustavo, University of California, Berkeley  
Mansouri, Sasan, Goethe University  
Mantegazza, Giacomo, Stanford Graduate School of Business  
Mantovani, Andrea, Toulouse Business School  
Manzoni, Elena, Dipartimento di Scienze Economiche  
Manzoor, Emaad, Cornell University  
Mao, Xiaojie, Cornell Tech  
Marchetti, Arianna, London Business School  
Marchica, Maria-Teresa, University of Manchester  
Mariathan, Mike, KU Leuven  
Marinesi, Simone, University of Pennsylvania  
Marinoni, Astrid, Georgia Institute of Technology  
Marion, Justin, University of California, Santa Cruz

Mariotti, Marco, Queen Mary University of London  
Markakis, Mihalis, IESE Business School  
Markou, Panos, University of Virginia  
Markov, Stanimir, University of Texas at Dallas  
Markus, Stanislav, University of South Carolina  
Marquardt, Kelli, Federal Reserve Bank of Chicago  
Marqués-Ibáñez, David, European Central Bank  
Marsh, Ian W., City University of London  
Marshall, Nathan, University of Colorado Boulder  
Martens, Tim, Bocconi University  
Marti, Chitra, New York University Stern School of Business  
Martin, Daniel, University of California, Santa Barbara  
Martin, Kirsten, University of Notre Dame  
Martin, Melissa, University of Illinois Chicago  
Martin, Patrick, University of Pittsburgh  
Martin, Sebastien, Northwestern University  
Martineau, Charles, University of Toronto  
Martinez, Marta Troya, New Economic School  
Martinez-Jerez, F. Asis, University of Notre Dame  
Martínez-Marquina, Alejandro, University of Southern California  
Martin-Utrera, Alberto, Iowa State University  
Marx, Benjamin, Boston University  
Masatlioglu, Yusufchan, University of Maryland, College Park  
Masclans, Roger, Duke University  
Maslach, David, Florida State University  
Massa, Massimo, INSEAD  
Massey, Cade, University of Pennsylvania  
Massoni, Sébastien, Panthéon-Sorbonne University  
Masulis, Ronald, University of New South Wales  
Matsushima, Noriaki, Osaka University  
Matthies, Ben, University of Notre Dame  
Mattsson, Martin, National University of Singapore  
Maturana, Gonzalo, Emory University  
Maurer, Thomas, Washington University  
Maurin, Vincent, HEC Paris  
Mayer, Erik, University of Wisconsin–Madison  
Mayer, Simon, University of Chicago  
Mayordomo, Sergio, Bank of Spain  
Mayya, Raveesh, New York University  
Mazur, Laurel, University of Notre Dame  
McCarthy, Daniel, Emory University  
McClure, Charles, University of Chicago

McCormack, Kristen, Harvard University  
McCoy, John, University of Pennsylvania  
McCevitt, Ryan, University of Rochester  
McElheran, Kristina, University of Toronto  
McFerran, Brent, Simon Fraser University  
McFowland III, Edward, Harvard Business School  
McGahan, Anita, University of Toronto  
McGee, Peter, University of Arkansas  
McGranaghan, Matthew, Cornell University  
McKean, Anna, University of Utah  
McKenzie, Craig, University of California, San Diego  
McManus, Brian, University of North Carolina at Chapel Hill  
McMullin, Jeff, Indiana University  
McNamara, Trent, Abilene Christian University  
Meager, Rachel, London School of Economics and Political Science  
Medeiros, Marcelo, Pontifical Catholic University of Rio de Janeiro  
Medina, Paolina, University of Houston  
Meer, Jonathan, Texas A&M University  
Megginson, William, University of Oklahoma  
Meggiorin, Katia, New York University  
Mehta, Mihir, University of Michigan  
Mehta, Nitin, University of Toronto  
Mehta, Ravi, University of Illinois Urbana-Champaign  
Meier, Armando, University of Lausanne  
Meier, Jean-Marie, University of Texas at Dallas  
Meisner, Vincent, Technical University Berlin  
Mejia, Jorge, Indiana University  
Melero, Eduardo, University Charles III of Madrid  
Melessa, Samuel, University of Iowa  
Mellers, Barbara, University of Pennsylvania  
Melone, Alessandro, Vienna Graduate School of Finance  
Meloso, Debrah, Toulouse Business School  
Meng, Lesley, Yale School of Management  
Meng, Xiaojing, New York University  
Meng, Zixuan, University of Texas at Dallas  
Mengel, Friederike, University of Essex  
Menon, Rahul, Purdue University  
Mensmann, Mona, University of Cologne  
Mercan, Yusuf, University of Manchester  
Merkle, Christoph, Aarhus University  
Merkley, Kenneth, Indiana University  
Merrick, Jason, Virginia Commonwealth University

Mersereau, Adam, University of North Carolina at Chapel Hill  
Mertens, Thomas, Federal Reserve Bank San Francisco  
Meshram, Rahul, Indian Institute of Management, Ahmedabad  
Meuris, Jirs, University of Wisconsin–Madison  
Meyer, Steffen, Aarhus University  
Meyer-Doyle, Philipp, INSEAD  
Mezzanotti, Filippo, Northwestern University  
Miao, Bin, Renmin University of China  
Miao, Rui, National Heart, Lung, and Blood Institute  
Miao, Sentao, University of Colorado Boulder  
Michaeli, Beatrice, University of California, Los Angeles  
Michels, Jeremy, Purdue University  
Mihov, Atanas, University of Kansas  
Miklós-Thal, Jeanine, University of Rochester  
Milbradt, Konstantin, Northwestern University  
Miles, William, Duke University  
Milidonis, Andreas, University of Cyprus  
Miller, Alex, University of Southern California  
Miller, Moses, Reichman University  
Miller, Shane, University of Michigan  
Min, Semi, University of Minnesota, Twin Cities  
Minetti, Raoul, Michigan State University  
Minner, Stefan, Technical University of Munich  
Minnis, Michael, University of Chicago  
Minoiu, Camelia, Federal Reserve Bank of Atlanta  
Minson, Julia, Harvard University  
Mintz, Yonatan, University of Wisconsin–Madison  
Miraldo, Marisa, Imperial College  
Miralles, Antonio, University of Messina  
Miric, Milan, University of Southern California  
Mirzaeian, Neda, University of Texas at Dallas  
Mishra, Anant, University of Minnesota  
Mišić, Velibor, University of California, Los Angeles  
Mislavsky, Robert, Johns Hopkins University  
Misra, Kanishka, University of California, San Diego  
Missirian, Anouch, Toulouse School of Economics  
Mitra, Indrajit, Federal Reserve Bank of Atlanta  
Mitrofanov, Dmitry, Boston College  
Mitsos, Alexander, RWTH Aachen University  
Mityakov, Sergey, Florida State University  
Mizik, Natalie, University of Washington  
Mo, Haitao, University of Kansas

Mobasser, Sanaz, University of California, Berkeley  
Mochon, Daniel, Tulane University  
Modaresi, Sajad, University of North Carolina at Chapel Hill  
Moeen, Mahka, University of Wisconsin–Madison  
Moehring, Alex, Massachusetts Institute of Technology  
Moen-Vorurm, Johan, London Business School  
Moers, Frank, Maastricht University  
Moghadas Khorasani, Sina, University of California, San Diego  
Mohammadi, Ali, Copenhagen Business School  
Mohan, Divyarthi, Tel Aviv University  
Mohler, George, Boston College  
Mohliver, Aharon, London Business School  
Moinas, Sophie, Universite Toulouse Capitole  
Moisan, Frederic, Emlyon Business School  
Mojir, Navid, Harvard Business School  
Molchanov, Alexander, Massey University  
Molenmaker, Welmer, Leiden University  
Molitero, Thomas, Vrije Universiteit Amsterdam  
Møller, Stig, Aarhus University  
Mollerstrom, Johanna, George Mason University  
Mollick, Ethan, University of Pennsylvania  
Mollner, Joshua, Northwestern University  
Momot, Ruslan, Northwestern University  
Monachou, Faidra, Yale University  
Moneta, Fabio, University of Ottawa  
Monnet, Cyril, University of Bern  
Monnet, Marion, University of Burgundy  
Montealegre, Andres, Cornell University  
Montero, Juan-Pablo, Pontificia Universidad Católica de Chile  
Monti, Alberto, University of Genoa  
Mooijman, Marlon, Rice University  
Moon, Alice, Georgetown University  
Moon, James, Georgia Institute of Technology  
Moon, Ken, Wharton School of the University of Pennsylvania  
Moon, S. Katie, University of Colorado Boulder  
Moore, David, Loyola Marymount University  
Moore, Don, University of California, Berkeley  
Moreau, Page, University of Wisconsin–Madison  
Moreira, Sara, Northwestern University  
Moreno-Ternero, Juan, Universidad Pablo de Olavide  
Morewedge, Carey, Boston University  
Morgenstern, Ilan, Stanford University

Morjaria, Ameet, Northwestern University  
Moroni, Sofia, Princeton University  
Morrill, Thayer, North Carolina State University  
Mortal, Sandra, University of Alabama  
Moshary, Sarah, University of Chicago  
Mosk, Thomas, Queen Mary University of London  
Mostagir, Mohamed, University of Michigan  
Mota, Lira, Massachusetts Institute of Technology  
Mou, Yuting, Southeast University  
Mount, Matthew, University of Adelaide  
Mousavi, Nasim, Georgia State University  
Mousavi, Reza, University of Virginia  
Moussawi, Rabih, Villanova University  
Mu, Liying, University of Delaware  
Mudambi, Ram, Temple University  
Mukerji, Sujoy, Queen Mary University of London  
Mukherjee, Abhiroop, Hong Kong University of Science and Technology  
Mukherjee, Rajiv, Texas A&M University  
Mukherjee, Ujjal, University of Illinois Urbana-Champaign  
Muller, Karsten, National University of Singapore  
Müller, Sebastian, Technical University of Munich  
Müller-Trede, Johannes, IESE Business School  
Mullins, William, University of California, San Diego  
Mulvany, Justin, University of Southern California  
Mummalaneni, Simha, University of Washington  
Mumtaz Choudhary, Saqib, University of California, Berkeley  
Mundru, Nishanth, Massachusetts Institute of Technology  
Muñoz-Rodriguez, Edwin, El Colegio de México  
Munro, Evan, Stanford University  
Munyikwa, Zanele, Massachusetts Institute of Technology  
Murad, Zahra, University of Portsmouth  
Murali, Karthik, Oregon State University  
Muravyev, Dmitriy, Michigan State University  
Murciano-Goroff, Raviv, Boston University  
Murphy, Dermot, University of Illinois Chicago  
Murray, Scott, Georgia State University  
Murthy, Karthyek, Singapore University of Technology and Design  
Musalem, Andres, University of Chile  
Muslu, Volkan, University of Houston  
Musolff, Leon, Microsoft Research  
Muthulingam, Suresh, Pennsylvania State University  
Myers, Kyle, Harvard Business School

Myers, Sean, University of Pennsylvania  
Naaraayanan, S. Lakshmi, Hong Kong University of Science and Technology  
Nadar, Emre, Bilkent University  
Nadarajah, Selvaprabu, University of Illinois Chicago  
Nafziger, Julia, Aarhus University  
Nagaraj, Abhishek, University of California, Berkeley  
Nagel, Rosmarie, Pompeu Fabra University  
Nageswaran, Leela, University of Washington  
Nagle, Frank, Harvard Business School  
Nagler, Markus, University of Erlangen–Nuremberg  
Naik, Prasad, University of California, Davis  
Najafi, Sajjad, HEC Paris  
Nallareddy, Suresh, University of Washington  
Namkoong, Hongseok, Columbia University  
Nanda, Ramana, Imperial College London  
Narang, Unnati, University of Illinois Urbana-Champaign  
Narayanamoorthy, Gans, Tulane University  
Narayanan, Sriram, Michigan State University  
Nary, Paul, Wharton School of the University of Pennsylvania  
Nasiry, Javad, McGill University  
Natan, Olivia, University of California, Berkeley  
Natarajan, Hari, University of Miami  
Natarajan, Karthik, University of Minnesota  
Nater, Christa, University of British Columbia  
Natividad, Gabriel, Universidad de Piura  
Nattamai Kannan, Karthik Babu, Southern Methodist University  
Naughton, James, University of Virginia  
Naumovska, Ivana, INSEAD  
Navarro-Martinez, Daniel, Pompeu Fabra University  
Nawaz, Tasawar, University of Huddersfield  
Neamtiu, Monica, University of Arizona  
Necker, Sarah, Ifo Institute for Economic Research  
Negro, Giacomo, Emory University  
Nekhili, Mehdi, Le Mans Université  
Nekrasov, Alexander, University of Illinois Chicago  
Nelson, Karen, Texas Christian University  
Nelson, Scott, University of Chicago  
Nerino, Marco, King's College London  
Nesterov, Alexander, HSE Saint Petersburg  
Netzer, Nick, University of Zurich  
Neuhierl, Andreas, University of Notre Dame  
Newberry, Peter, University of Georgia

Newell, Ben, University of New South Wales  
Newman, Andrew, University of South Carolina  
Newton, Nate, Florida State University  
Nezlobin, Alexander, London School of Economics and Political Science  
Ng, David, Cornell University  
Ng, Jeffrey, University of Hong Kong  
Ng, Lilian, York University  
Ng, Szu Hui, National University of Singapore  
Ng, Weiyi, National University of Singapore  
Nguyen, Giang, Pennsylvania State University  
Nguyen, Jason, Western University  
Nguyen, Quoc, DePaul University  
Nguyen, Thanh, Purdue University  
Nguyen, Viet Anh, Chinese University of Hong Kong  
Ni, Chenkai, Fudan University  
Ni, Jian, Virginia Tech  
Nian, Tingting, University of California, Irvine  
Niazadeh, Rad, University of Chicago  
Nickerson, Jordan, University of Washington  
Nicolaidis, Christos, University of Cyprus  
Nicoletti, Allison, University of Pennsylvania  
Nie, Cheng, Iowa State University  
Niehuas, Greg, University of South Carolina  
Nieken, Petra, Karlsruhe Institute of Technology  
Nielsen, Kasper, Hong Kong University of Science and Technology  
Nielsen, Kirby, Ohio State University  
Nielson, Jed, Pennsylvania State University  
Nienhaus, Martin, Ruhr University Bochum  
Niessner, Marina, University of Pennsylvania  
Niewoehner, R. J., Indiana University Bloomington  
Nikzad, Afshin, Stanford University  
Ning, Jie, Case Western Reserve University  
Ning, Z. Eddie, Cheung Kong Graduate School of Business  
Ninh, Anh, William & Mary  
Nittala, Lakshmi, University of Dayton  
Niu, Baozhuang, South China University of Technology  
Nix, Emily, University of Southern California  
Nocera, Giacomo, Audencia Business School  
Noh, Daehoon, University of California, San Diego  
Noh, In Joon, Pennsylvania State University  
Noh, Joonki, Case Western Reserve University  
Noh, Suzie, Massachusetts Institute of Technology

Nolte, Sven, Radboud University  
Non, Arjan, Maastricht University  
Noor, Jawwad, Boston University  
Norden, Lars, Fundação Getulio Vargas  
Nordstrom Skans, Oskar, Uppsala University  
Nosenzo, Daniele, Aarhus University  
Noth, Felix, Halle Institute for Economic Research  
Novelli, Elena, City, University London  
Nozawa, Yoshio, University of Toronto  
Nunnari, Salvatore, Bocconi University  
Nurmohamed, Samir, University of Pennsylvania  
Nyborg, Karine, University of Oslo  
Obermeier, Daniel, New York University  
Obermeyer, Ziad, University of California, Berkeley  
Obizhaeva, Olga, Stockholm School of Economics  
Oblander, Shin, Columbia University  
O'Brien, Ed, University of Chicago  
O'Connell, Stephen D., Emory University  
O'Donoghue, Ted, Cornell University  
Ody-Brasier, Amandine, McGill University  
Odzimekowska, Kate, University of Toronto  
Oechssler, Joerg, University of Heidelberg  
Oehmke, Martin, London School of Economics and Political Science  
Oery, Aniko, Yale University  
Oettl, Alex, Georgia Institute of Technology  
Ofosu, Emmanuel, City University of Hong Kong  
Oh, Jaelynn, University of Utah  
Oh, Jean, Columbia University  
Oh, Ji Yeol Jimmy, Sungkyunkwan University  
Ohyama, Atsushi, Hitotsubashi University  
Olbert, Marcel, London Business School  
Oliva, Rogelio, Texas A & M University  
Omartian, Jim, University of Michigan  
Omer, Thomas, University of Nebraska–Lincoln  
Oncüler, Ayse, ESSEC Business School  
Onderstal, Sander, University of Amsterdam  
O'Neill, Peter, University of New South Wales  
Ongena, Steven, University of Zurich  
Oostrom, Tamar, Ohio State University  
Opp, Christian, University of Rochester  
Oprea, Ryan, University of British Columbia  
Oraiopoulos, Nektarios, Cambridge University

Orfanoudaki, Agni, University of Oxford  
Orhun, Yesim, University of Michigan  
Orlandi, Ilaria, Copenhagen Business School  
Orlov, Dmitry, University of Rochester  
Orłowski, Piotr, HEC Montreal  
Ormazabal, Gaizka, IESE Business School  
Ormeci, Lerzan, Koç University  
Ormeci, Melda, University of New Hampshire  
Ors, Evren, HEC Paris  
Orsdemir, Adem, University of California, Riverside  
Ortega, Josue, Queen's University Belfast  
Ortiz-Molina, Hernan, University of British Columbia  
Osadchiy, Nikolay, Emory University  
Osborne, Matthew, University of Toronto  
Oshtose, Abraham, Emory University  
Ostrov, Daniel, Santa Clara University  
Otis, Nicholas, University of California, Berkeley  
Ottonello, Giorgio, Nova School of Business and Economics  
Ouazad, Amine, Rutgers University  
Ovchinnikov, Anton, Queen's University  
Overmeyer, Natasha, Stanford Graduate School of Business  
Owens, Bradley, Brigham Young University  
Oz, Binyamin, Hebrew University of Jerusalem  
Ozalp, Hakan, University of Amsterdam  
Ozbas, Oguzhan, Boğaziçi Üniversitesi  
Ozbay, Erkut, University of Maryland  
Ozdogli, Ali K., Federal Reserve Bank of Dallas  
Ozdemir, Dicle Yagmur, University of Texas at Dallas  
Ozel, N. Bugra, University of Texas at Dallas  
Ozer, Gorkem, University of Maryland, College Park  
Ozkan, Erhun, Koç University  
Oztekin, Ozde, Florida International University  
Pacelli, Joseph, Harvard Business School  
Pachamanova, Dessislava, Babson College  
Packard, Heidi, University of Michigan  
Paddrik, Mark, U.S. Department of the Treasury  
Padmanabhan, Divya, Indian Institute of Technology Goa  
Pae, Suil, Sungkyunkwan University  
Pagel, Michaela, Columbia University  
Pai, Mallesh, Rice University  
Paik, Yongwook, Korea Advanced Institute of Science and Technology  
Painter, Marcus, St. Louis University

Pais, Joana, Institute of Economics and Management  
Palacios, Miguel, University of Calgary  
Palazzo, Berardino, Federal Reserve Board  
Palley, Asa, Indiana University Bloomington  
Palomares, Antonio, University of Granada  
Palomeras, Neus, University Charles III of Madrid  
Paludkiewicz, Karol, Deutsche Bundesbank  
Pan, Lingling, University of Pittsburgh  
Pan, Xiajun, University of Florida  
Pan, Xiaodan, Concordia University  
Pan, Yang, Louisiana State University  
Pan, Yihui, University of Utah  
Pan, Zhiyuan, Southwestern University of Finance and Economics  
Panayides, Marios, University of Pittsburgh  
Pancost, Aaron, University of Texas at Austin  
Pang, Min-Seok, Temple University  
Pang, Zhan, Purdue University  
Pangburn, Michael, University of Oregon  
Pant, Gautam, University of Iowa  
Pápai, Szilvia, Concordia University  
Papanastasiou, Yiangos, University of California, Berkeley  
Papies, Dominik, University of Tübingen  
Parakhonyak, Alexei, University of Oxford  
Parasurama, Prasanna, New York University  
Pareek, Ankur, Bucknell University  
Park, Eunho, California State University, Long Beach  
Park, Hoonsuk, University of Melbourne  
Park, Jihwon, Baruch College  
Park, Jiyong, University of Georgia  
Park, Michael, INSEAD  
Park, Minje, Boston University  
Park, Seung Jae, Yonsei University  
Park, Sun Hyun, Seoul National University  
Park, Sunghyuk, Korea Advanced Institute of Science and Technology  
Park, Sungsik, University of South Carolina  
Park, Yejin, New York University  
Park, Young-Hoon, Cornell University  
Parker, Chris, American University  
Pashchenko, Svetlana, University of Georgia  
Pasini, Giacomo, Ca' Foscari University of Venice  
Patatoukas, Panos, University of California, Berkeley  
Patel, Vinay, University of Technology Sydney

Patrick, Paige, University of Illinois Chicago  
Patridge, Clay, Ohio State University  
Pattathil, Sarath, Massachusetts Institute of Technology  
Paul, Pascal, Federal Reserve Bank San Francisco  
Paulson, Elisabeth, Harvard University  
Pauphilet, Jean, London Business School  
Pauwels, Koen, Northeastern University  
Pavlin, Michael, Wilfrid Laurier University  
Pavlov, Valery, University of Auckland  
Pawliczek, Andrea, University of Colorado  
Pawlina, Grzegorz, Lancaster University  
Pawlowski, Tim, University of Tübingen  
Paya, Ivan, Lancaster University  
Paye, Bradley, Virginia Tech  
Payne, Richard, City University of London  
Pederzoli, Paola, University of Houston  
Pedraza-Martinez, Alfonso, University of Notre Dame  
Peeters, Thomas, Erasmus University Rotterdam  
Pei, Amy, Northeastern University  
Peijnenburg, Kim, EDHEC Business School  
Peker, Cem, Erasmus University Rotterdam  
Pelizzon, Lorian, Università Ca' Foscari di Venezia  
Pelster, Matthias, Universität Duisburg-Essen  
Pelzl, Paul, Norwegian School of Economics  
Penaranda, Francisco, Queens College  
Pendem, Pradeep, University of Oregon  
Pender, Jamol, Cornell University  
Peng, Cameron, London School of Economics and Political Science  
Peng, Jiming, University of Houston  
Peng, Jing, University of Connecticut  
Peng, Lin, Baruch College  
Peng, Tianyi, Massachusetts Institute of Technology  
Peng, Xiaoshan, Indiana University Bloomington  
Penmetsa, Nabita, University of Utah  
Pennington, Keith, University of Connecticut  
Peretz, Ron, Bar-Ilan University  
Perez Cavazos, Gerardo, University of California, San Diego  
Perignon, Christophe, HEC Paris  
Persson, Anh, University of Illinois Urbana-Champaign  
Pescher, Christian, Universidad de los Andes  
Peski, Marcin, University of Toronto  
Peter, Noemi, University of Groningen

Petersen, Luba, Simon Fraser University  
Peterson, Kyle, University of Oregon  
Petmezas, Dimitris, Durham University  
Peton, Olivier, IMT Atlantique  
Petrooulos, Fotios, University of Bath  
Petrov, Evgeny, University of Zurich  
Pettibone, Jonathan, Southern Illinois University Edwardsville  
Peukert, Christian, University of Lausanne  
Peura, Heikki, Imperial College  
Pevzner, Mikhail, University of Baltimore  
Pezone, Vincenzo, Tilburg University  
Phalippou, Ludo, University of Oxford  
Phan, Toan, Federal Reserve Bank of Richmond  
Pierce, Spencer, Florida State University  
Piezunka, Henning, INSEAD  
Pikulina, Elena, UBC Sauder School of Business  
Pinardon-Touati, Noemie, HEC Paris  
Pinheiro, Roberto, Federal Reserve Bank of Cleveland  
Pinkowitz, Lee, Georgetown University  
Pinto, Roberto, Lancaster University  
Pirino, Davide, Universita' di Roma Tor Vergata  
Pirinsky, Christo, University of Central Florida  
Pisciotta, Kevin, University of Kansas  
Pitkäjärvi, Aleks, Aalto University  
Pizarro, Dana, Toulouse School of Economics  
Plante, Sebastian, University of Wisconsin–Madison  
Platanakis, Emmanouil, University of Bath  
Pless, Jacquelyn, Massachusetts Institute of Technology  
Png, Ivan, National University of Singapore  
Podimata, Charikleia, Harvard University  
Poege, Felix, Bocconi University  
Pogrebna, Ganna, Alan Turing Institute  
Poliquin, Christopher, University of California, Los Angeles  
Polkovnichenko, Valery, Federal Reserve Board  
Pomatto, Luciano, California Institute of Technology  
Pongeluppe, Leandro, Wharton School of the University of Pennsylvania  
Porac, Joe, New York University  
Porter, Michael, University of Virginia  
Posenau, Kelly, Cornell University  
Post, Thierry, Koç University  
Post, Thomas, Maastricht University  
Postek, Krzysztof, Technion – Israel Institute of Technology

Poti, Valerio, University College Dublin  
Pouget, Sébastien, Toulouse School of Economics  
Pourghannad, Behrooz, University of Oregon  
Powell, Mike, Northwestern University  
Prabhala, Nagpurnanand, Johns Hopkins University  
Pradelski, Bary, ETH Zürich  
Prado, Melissa, Nova School of Business and Economics  
Prat, Julian, École Polytechnique  
Prato, Matteo, Università della Svizzera Italiana  
Prem, Mounu, Universidad Del Rosario  
Prendergast, Canice, University of Chicago  
Presbitero, Andrea, International Monetary Fund  
Presslee, Adam, University of Waterloo  
Preuss, Marcel, Cornell University  
Previtero, Alessandro, Indiana University  
Prietula, Michael, Emory University  
Prince, Jeffrey, Indiana University  
Proserpio, Davide, University of Southern California  
Prowse, Victoria, Purdue University  
Prüfer, Jens, Tilburg University  
Pruitt, Seth, Arizona State University  
Prummer, Anja, Johannes Kepler University Linz  
Prusty, Siddharth, Duke University  
Pu, Jingchuan, University of Florida  
Pukthuanthong, Kuntara, University of Missouri  
Pullabhotla, Hemant, Deakin University  
Pun, Hubert, University of Western Ontario  
Puntoni, Stefano, Wharton School of the University of Pennsylvania  
Puranam, Dinesh, University of Southern California  
Puri, Indira, New York University  
Purnanandam, Amiyatosh, University of Michigan  
Pursiainen, Vesa, University of Hong Kong  
Qi, Anyan, University of Texas at Dallas  
Qi, Jin, Hong Kong University of Science and Technology  
Qi, Meng, University of California, Berkeley  
Qi, Wei, Tsinghua University  
Qi, Xiangtong, Hong Kong University of Science and Technology  
Qi, Zhengling, George Washington University  
Qian, Franklin, University of North Carolina at Chapel Hill  
Qian, Kun, Southern University of Science and Technology  
Qian, Pengyu, Purdue University  
Qian, Wenlan, National University of Singapore

Qian, Yan, University of North Carolina at Chapel Hill  
Qian, Yan, Central University of Finance and Economics  
Qian, Yi, University of British Columbia  
Qian, Yiming, University of Connecticut  
Qiao, Dandan, National University of Singapore  
Qiao, Kunyuan, Georgetown University  
Qin, Bo, University of Melbourne  
Qin, Hanzhang, National University of Singapore  
Qin, Shihua, HKU Business School  
Qiu, Jiaping, McMaster University  
Qiu, Liangfei, University of Florida  
Qiu, Lin, Purdue University  
Qu, Xiangyu, Centre National de la Recherche Scientifique  
Qu, Xinxue (Shawn), University of Notre Dame  
Quercia, Simone, University of Verona  
Quinn, Phil, University of Washington  
Quint, Marcel, Ludwig Maximilian University of Munich  
Quintane, Eric, European School of Management and Technology  
Quispe-Torreblanca, Edika, University of Warwick  
Rabanal, Jean Paul, University of Stavanger  
Rabetti, Daniel, National University of Singapore  
Rachedi, Omar, ESADE Business School  
Radoynovska, Nevena, Emlyon Business School  
Rafieian, Omid, Cornell University  
Raghavan, Manish, Harvard University  
Raghunandan, Aneesh, London School of Economics and Political Science  
Rahimian, M. Amin, University of Pittsburgh  
Rahmani, Morvarid, Georgia Institute of Technology  
Rahwan, Iyad, Max Planck Institute for Human Development  
Raiteri, Emilio, École Polytechnique  
Raith, Michael, University of Rochester  
Raj, Manav, Wharton School of the University of Pennsylvania  
Rajan, Balaraman, California State University, East Bay  
Rajan, Uday, University of Michigan  
Rajaram, Prashant, Western University  
Rakow, Tim, King's College London  
Ramachandran, Karthik, Georgia Institute of Technology  
Ramanan, Paritosh, Oklahoma State University  
Ramanan, Ram, Indian School of Business  
Ramasubramanian, Hari, Frankfurt School of Finance & Management  
Ramchandani, Abhishek, University of Hawai'i at Mānoa  
Ramchandani, Pia, Wharton School of the University of Pennsylvania

Ramelli, Stefano, University of St. Gallen  
Ramesh, K., Rice University  
Rancourt, Marie-Eve, HEC Montréal  
Rand, David, Massachusetts Institute of Technology  
Rand, William, University of Maryland  
Ranehill, Eva, University of Zurich  
Ransbotham, Sam, Boston College  
Rantala, Ville, University of Miami  
Rao, Anita, Georgetown University  
Rao, Raghunath, University of Texas at Austin  
Rao, Vithala, Cornell University  
Rapach, David, Federal Reserve Bank of Atlanta  
Rasch, Alexander, Düsseldorf Institute for Competition Economics  
Rasocha, Vlasta, Stanford University  
Rath, Sandeep, University of North Carolina at Chapel Hill  
Rathelot, Roland, Institut Polytechnique de Paris  
Ratnadiwakara, Dimuthu, Louisiana State University  
Rau, Holger, University of Goettingen  
Rau, Raghu, University of Cambridge  
Rauf, Asad, University of Groningen  
Rauter, Thomas, University of Chicago  
Raux, Raphael, Harvard University  
Raveendran, Marlo, University of California, Riverside  
Ravid, Doron, University of Chicago  
Ravindran, Dilip, Humboldt University of Berlin  
Rawson, Caleb, University of Arkansas  
Ray, Abhishek, George Mason University  
Ray, Gautam, University of Minnesota  
Ray, Sugata, University of Alabama  
Raymond, Collin, Purdue University  
Read, Daniel, Durham University  
Reagans, Ray, Massachusetts Institute of Technology  
Recalde, Maria, University of Melbourne  
Reeb, David, National University of Singapore  
Reeck, Crystal, Temple University  
Rees-Jones, Alex, University of Pennsylvania  
Rege, Mari, University of Stavanger  
Regnier, Eva, Naval Postgraduate School  
Rego, Sonja, Indiana University  
Reher, Michael, University of California, San Diego  
Reichman, Shachar, Tel Aviv University  
Reid, Erin, McMaster University

Reiff, Joseph, University of Maryland  
Reimer, Marko, WHU - Otto Beisheim School of Management  
Reimers, Imke, Northeastern University  
Reinholtz, Nicholas, University of Colorado Boulder  
Reisinger, Markus, WHU – Otto Beisheim School of Management  
Reiter, Nayana, University of Toronto  
Ren, Honglin, Renmin University of China  
Ren, Qitian, Chinese University of Hong Kong, Shenzhen  
Ren, Xiao, Chinese University of Hong Kong  
Ren, Yufei, University of Minnesota Duluth  
Ren, Zhimei, Wharton School of the University of Pennsylvania  
Rennekamp, Kristina, Cornell University  
Reno, Roberto, ESSEC Business School  
Reppen, Max, Boston University  
Repullo, Rafael, Center for Monetary and Financial Studies  
Resende, Joana, Universidade do Porto  
Reshef, Oren, Washington University in St. Louis  
Resin, Johannes, Heidelberg University  
Reyes, German, Institute on Behavior & Inequality  
Rezaei, Sarah, Utrecht University  
Rhee, Chang-Han, Northwestern University  
Rheinhardt, Alexandra, University of Connecticut  
Rhodes, Adrienne, Texas A&M University  
Rhodes, Andrew, Toulouse School of Economics  
Rhue, Lauren, University of Maryland, College Park  
Rhymer, Jen, University College London  
Richard, Thibault, École Normale Supérieure Paris-Saclay  
Richmond, Robert, New York University  
Rickmann, Georg, Northwestern University  
Riddiough, Steven, University of Toronto  
Rider, Christopher, University of Michigan  
Riedel, Frank, Bielefeld University  
Riedl, Christoph, Northeastern University  
Riedl, Eddie, Harvard Business School  
Riedmiller, Sebastian, Max Planck Institute for Research on Collective Goods  
Rieger, Marc Oliver, University of Zurich  
Rietveld, Joost, University College London  
Rime, Dagfinn, BI Norwegian Business School  
Ringel, Daniel, University of North Carolina at Chapel Hill  
Rios, Ignacio, University of Texas at Dallas  
Risen, Jane, University of Chicago  
Rishika, Rishika, North Carolina State University

Rissing, Ben, Cornell University  
Ritadhi, S. K., Ashoka University  
Rivera, Alejandro, University of Texas at Dallas  
Rivera, Thomas, McGill University  
Riyanto, Yohanes, Nanyang Technological University  
Rizzi, Claudio, University of Navarra  
Robertson, Adriana, University of Chicago Law School  
Robinson, David, Duke University  
Robinson-Cortés, Alejandro, University of Exeter  
Robitaille, Nicole, Queen's University  
Robotti, Cesar, University of Warwick  
Roche, Maria, Harvard University  
Rock, Daniel, Wharton School of the University of Pennsylvania  
Rodilitz, Scott, University of California, Los Angeles  
Roet-Green, Ricky, University of Rochester  
Rogers, Jonathan, University of Colorado  
Rohrer, Maximilian, Norwegian School of Economics  
Roider, Andreas, University of Regensburg  
Rola-Janicka, Magdalena, Imperial College London  
Roland, Gerard, University of California, Berkeley  
Roman, Raluca, Federal Reserve Bank of Philadelphia  
Romero, Gonzalo, University of Toronto  
Romm, Assaf, Hebrew University of Jerusalem  
Rommewinkel, Hendrik, Waseda Institute for Advanced Study  
Ronayne, David, European School of Management and Technology  
Rong, Ying, Shanghai Jiao Tong University  
Roos, Jason, Erasmus University  
Rosaia, Nicola, Columbia University  
Rosazza Gianin, Emanuela, University of Milano-Bicocca  
Rosokha, Yaroslav, Purdue University  
Ross, Stephen, National Bureau of Economic Research  
Rossi, Alberto, Georgetown University  
Rossi, Federico, Purdue University  
Rossi, Marco, Texas A&M University  
Rosu, Ioanid, HEC Paris  
Rother, Simon, Copenhagen Business School  
Rothschild, David, Microsoft Research  
Roth Tran, Brigitte, Federal Reserve Bank San Francisco  
Rott, Christina, Vrije Universiteit Amsterdam  
Rottman, Benjamin, University of Pittsburgh  
Rouen, Ethan, Harvard Business School  
Roulet, Alexandra, INSEAD

Roussellet, Guillaume, McGill University  
Roussille, Nina, Massachusetts Institute of Technology  
Rouwendal, Jan, Vrije Universiteit Amsterdam  
Roy, Abhishek, Temple University  
Roychowdhury, Sugata, Northwestern University  
Ru, Hong, Nanyang Technological University  
Ruan, Hongxun, Peking University  
Ruan, Tianyue, National University of Singapore  
Rubel, Olivier, University of California, Davis  
Ruble, Richard, Emlyon Business School  
Rud, Olga, University of Stavanger  
Ruef, Martin, Duke University  
Ruffle, Bradley, McMaster University  
Ruiz-Aliseda, Francisco, Pontificia Universidad Católica de Chile  
Rujeerapaiboon, Napat, National University of Singapore  
Rupar-Wang, Kathy, Georgia Institute of Technology  
Russo, Dan, Columbia University  
Rust, John, Georgetown University  
Ryall, Michael, University of Toronto  
Ryan, Stephen, New York University  
Ryu, Minseok, University of Michigan  
Ryzhov, Ilya, University of Maryland  
Saavedra, Daniel, University of California, Los Angeles  
Saban, Daniela, Stanford Graduate School of Business  
Sabety, Adrienne, Stanford University  
Sabzehzar, Amin, Tulane University  
Saccardo, Silvia, Carnegie Mellon University  
Sachdeva, Kunal, Rice University  
Sade, Orly, Hebrew University of Jerusalem  
Sadka, Gil, University of Texas at Dallas  
Sadler, Evan, New York University  
Saeedi, Maryam, Carnegie Mellon University  
Saelzer, Maik, Bocconi University  
Saez De Tejada Cuenca, Anna, IESE Business School  
Saglam, Mehmet, University of Cincinnati  
Sahni, Navdeep, Stanford University  
Sahoo, Roshni, Stanford University  
Sahuguet, Nicolas, HEC Montréal  
Saidi, Farzad, University of Bonn  
Sajeesh, Sajeesh, University of Nebraska–Lincoln  
Sala, Carlo, ESADE Business School  
Saldanha, Terence, University of Georgia

Saleh, Fahad, Wake Forest University  
Salz, Tobias, Massachusetts Institute of Technology  
Samaranayake, Samitha, Cornell University  
Sambalaibat, Batchimeg, Princeton University  
Samiedaluie, Saied, University of Alberta  
Samorani, Michele, Santa Clara University  
Samtani, Sagar, Indiana University Bloomington  
Samuels, Delphine, University of Chicago  
Sand, Wilfried, Toulouse School of Economics  
Sanders, Robert, University of California, San Diego  
Sandikci, Burhaneddin, University of Chicago  
Sandulescu, Mirela, University of Michigan  
Sandvik, Jason, University of Arizona  
Sand-Zantman, Wilfried, ESSEC Business School  
Sankaranarayanan, Sriram, Indian Institute of Management, Ahmedabad  
Sannino, Francesco, Frankfurt School of Finance & Management  
Santaló Mediavilla, Juan, IE Business School  
Santamaria, Simone, National University of Singapore  
Santos, André, University of Edinburgh  
Santos-Pinto, Luis, University of Lausanne  
Sapp, Travis, Iowa State University  
Sarada, University of Wisconsin–Madison  
Saretto, Alessio, Federal Reserve Bank of Dallas  
Sarhangian, Vahid, University of Toronto  
Sarkar, Arkodipta, National University of Singapore  
Sarno, Lucio, City, University of London  
Satopaa, Ville, INSEAD  
Sauermaun, Henry, European School of Management and Technology  
Sauermaun, Jan, Stockholm University  
Saure, Denis, University of Pittsburgh  
Sauvagnat, Julien, Bocconi University  
Savochkin, Andrei, Bocconi University  
Savva, Nicos, London Business School  
Scarsini, Marco, LUISS Guido Carli  
Schabus, Mario, Michigan State University  
Schaefer, Maximilian, Yale University  
Schäfer, Maximilian, University of Bologna  
Schanke, Scott, University of Wisconsin–Milwaukee  
Scharfmann, Emma, University of California, Berkeley  
Schechter, Aaron, University of Georgia  
Schenone, Carola, University of Virginia  
Schepens, Glenn, European Central Bank

Scherbina, Anna, Brandeis University  
Schildberg-Hörisch, Hannah, Düsseldorf Institute for Competition Economics  
Schiller, Christoph, Arizona State University  
Schilling, Linda, Washington University in St. Louis  
Schindler, David, Tilburg University  
Schiprowski, Amelie, University of Bonn  
Schivardi, Fabiano, LUISS Guido Carli  
Schlager, Tobias, University of Lausanne  
Schlapp, Jochen, Frankfurt School of Finance & Management  
Schleicher, Thomas, University of Manchester  
Schley, Dan, Erasmus University  
Schloetzer, Jason, Georgetown University  
Schmalz, Martin, University of Oxford  
Schmardebeck, Roy, University of Tennessee, Knoxville  
Schmid, Thomas, University of Hong Kong  
Schmidt, William, Emory University  
Schmitz, Jan, ETH Zürich  
Schnakenberg, Keith, Washington University in St. Louis  
Schneemeier, Jan, Indiana University  
Schneider, Christoph, Tilburg University  
Schneider, Paul, University of Lugano  
Schoenfeld, Jordan, Dartmouth College  
Schoenmakers, John, Weierstrass Institute  
Schöne, Jonas, Stanford University  
Schöttner, Anja, Humboldt University of Berlin  
Schrimpf, Paul, University of British Columbia  
Schröder, Marina, Universität Hannover  
Schroeder, Joe, Indiana University  
Schroeder, Juliana, University of California, Berkeley  
Schudy, Simeon, Ulm University  
Schuett, Florian, KU Leuven  
Schuetz, Sebastian, Sam M. Walton College of Business  
Schuhmacher, Karl, Emory University  
Schulte-Runne, Elisabeth, University of Marburg  
Schultz, Paul, University of Notre Dame  
Schultze, Thomas, University of Göttingen  
Schumacher, David, McGill University  
Schumacher, Heiner, KU Leuven  
Schurr, Amos, Ben-Gurion University of the Negev  
Schwardmann, Peter, University of Munich  
Schwartzstein, Josh, Harvard Business School  
Schwartz-Ziv, Miriam, Michigan State University

Schwarz, Marco, Heinrich Heine University Düsseldorf  
Scopelliti, Irene, City University London  
Scoppa, Vincenzo, Università della Calabria  
Scott, Alex, University of Tennessee, Knoxville  
Scott, Erin, Massachusetts Institute of Technology  
Scott, Joseph, Georgia Institute of Technology  
Scully, Ziv, Cornell University  
Scur, Daniela, Cornell University  
Sebald, Alexander, Copenhagen Business School  
Sedoc, João, New York University  
Seegmiller, Bryan, Northwestern University  
Segal, Carmit, University of Zurich  
Segal, Gill, University of North Carolina at Chapel Hill  
Segal, Uzi, Boston College  
Segev, Danny, Tel Aviv University  
Segev, Ella, Hebrew University of Jerusalem  
Segura, Anatoli, Bank of Italy  
Seifert, Matthias, IE Business School  
Seiler, Stephan, Imperial College London  
Sekar, Shreyas, University of Toronto Scarborough  
Sela, Aner, University of Florida  
Sele, Daniela, ETH Zürich  
Selove, Matthew, Chapman University  
Sen, Ananya, Carnegie Mellon University  
Seo, Haram, Texas A&M University  
Seo, Hojun, Purdue University  
Seo, Sang Byung, University of Wisconsin–Madison  
Seregni, Carol, University of Pennsylvania  
Serfling, Matthew, University of Tennessee  
Serpa, Juan, McGill University  
Serra, Danila, Texas A&M University  
Serra-Garcia, Marta, University of California, San Diego  
Serrano, Carlos, HEC Paris  
Sertsios, Giorgo, Universidad de los Andes  
Sethuraman, Jay, Columbia University  
Sethuraman, Mani, Cornell University  
Sethuraman, Nagarajan, University of Kansas  
Sette, Enrico, Bank of Italy  
Sevcenko, Victoria, INSEAD Asia Campus  
Sevilir, Merih, ESMT Berlin  
Seybert, Nick, University of Maryland  
Seyhun, Nejat, University of Michigan

Shachat, Jason, Durham University  
Shaffer, Matthew, University of Southern California  
Shafieezadeh-Abadeh, Soroosh, Cornell University  
Shah, Anuj, University of Chicago  
Shah, Avni, University of Toronto  
Shahrokhi Tehrani, Shervin, University of Texas at Dallas  
Shakhnov, Kirill, University of Surrey  
Shaliastovich, Ivan, University of Wisconsin–Madison  
Shamir, Noam, Tel Aviv University  
Shams, Amin, Ohio State University  
Shamshur, Anastasiya, King's College London  
Shan, Xi, Bemidji State University  
Shan, Xiaoyue, National University of Singapore  
Shang, Guangzhi, Florida State University  
Shang, Weixin, Lingnan University  
Shankar, Ramesh, University of Connecticut  
Shao, Lusheng, University of Manchester  
Shapiro, Alexander, Georgia Institute of Technology  
Shapiro, Bradley, University of Chicago  
Shapiro, Dmitry, Seoul National University  
Shapiro, Joel, University of Oxford  
Shaposhnik, Yaron, University of Rochester  
Sharkey, Amanda, University of Chicago  
Sharma, Luv, University of South Carolina  
Sharma, Siddhartha, Indiana University Bloomington  
Sharma, Vasundhara, Indian School of Business–Mohali  
She, Guoman, University of Hong Kong  
She, Zhaowei, Singapore Management University  
Shechter, Steven, University of British Columbia  
Sheer, Lia, Tel Aviv University  
Shehadeh, Karmel S., Lehigh University  
Shekhar, Shiva, Tilburg University  
Shelef, Orie, University of Utah  
Shen, Dennis, University of California, Berkeley  
Shen, Haoming, University of Arkansas  
Shen, Michael, National University of Singapore  
Shen, Rui, Chinese University of Hong Kong  
Shen, Siqian, University of Michigan  
Shen, Yiwen, Hong Kong University of Science and Technology  
Sheneman, Amy, Ohio State University  
Sheng, Jinfei, University of California Irvine  
Sher, Shlomi, Pomona College

Sherman, Ann, DePaul University  
Sherman, Eliot, Georgetown University  
Shi, Chengchun, London School of Economics and Political Science  
Shi, Cong, University of Miami  
Shi, Duo, Chinese University of Hong Kong  
Shi, Lanfei, University of Virginia  
Shi, Michael, Arizona State University  
Shi, Peng, University of Southern California  
Shi, Pengyi, Purdue University  
Shi, Qiaoni, Bocconi University  
Shi, Ruixia, University of San Diego  
Shi, Wei, University of Miami  
Shi, Yuan, Cornell University  
Shi, Yushui, Monash University  
Shi, Zhan, Tsinghua University  
Shi, Zhen, Georgia State University  
Shi, Zijun, Hong Kong University of Science and Technology  
Shibuya, Yoko, Duke University  
Shikhelman, Clara, Chaincode Labs  
Shiller, Ben, Brandeis University  
Shim, John, University of Notre Dame  
Shin, Donghwa, Princeton University  
Shin, Dongwook, Hong Kong University of Science and Technology  
Shin, Hyoduk, University of California, San Diego  
Shin, Jae Yong, Seoul National University  
Shin, Jee-Eun, University of Toronto  
Shin, Jiwoong, Yale University  
Shin, Ryan, Cornell University  
Shin, Taekjin, San Diego State University  
Shin, Woochoel, University of Florida  
Shivdasani, Anil, University of North Carolina  
Shive, Sophie, University of Notre Dame  
Shkilko, Andriy, Wilfrid Laurier University  
Shoag, Daniel, Case Western Reserve University  
Shorrer, Ran, Pennsylvania State University  
Shriver, Scott, University of Colorado Boulder  
Shroff, Pervin, University of Minnesota, Twin Cities  
Shu, Susan, Boston college  
Shugan, Steven, University of Florida  
Shumsky, Robert, Dartmouth College  
Shunko, Masha, University of Washington  
Shurchkov, Olga, Wellesley College

Shvadron, Dror, Duke University  
Shvets, Julia, University of Cambridge  
Shy, Oz, Federal Reserve Bank of Atlanta  
Sialm, Clemens, University of Texas at Austin  
Siamionava, Katsiaryna, Arizona State University  
Siano, Federico, University of Texas at Dallas  
Siddiq, Auyon, University of California, Los Angeles  
Siddique, Zahra, University of Bristol  
Siddiqui, Afzal, Stockholm University  
Siderius, James, Massachusetts Institute of Technology  
Siebert, Johannes, University of Bayreuth  
Siegel, Jordan, University of Michigan  
Siegenthaler, Simon, University of Texas at Dallas  
Siemroth, Christoph, University of Essex  
Siemens, Enno, University of Minnesota  
Siflinger, Bettina, Tilburg University  
Sikes, Stephanie, University of Illinois Chicago  
Sikochi, Anywhere, Harvard University  
Silberholz, John, University of Michigan  
Silva, Andre, Nova School of Business and Economics  
Silva, Rui, New University of Lisbon  
Sillers, Roger, University of Utah  
Sim, Jaeung, University of Connecticut  
Simaan, Majeed, Stevens Institute of Technology  
Simmons, Robert, Lancaster University  
Simonov, Andrey, Columbia University  
Şimşek, A. Serdar, University of Texas at Dallas  
Sinchaisri, Wichinpong, University of California, Berkeley  
Singal, Raghav, Columbia University  
Singh, Amandeep, University of Washington  
Singh, Jasjit, INSEAD  
Singh, Juni, California Institute of Technology  
Singh, Manpreet, Georgia Institute of Technology  
Singh, Shubhranshu, Johns Hopkins University  
Singh, Siddharth Prakash, University College London  
Singh, Yahaswini, Brown University  
Singhvi, Divya, New York University  
Singhvi, Somya, University of Southern California  
Sinha, Kirti, University of Texas at Dallas  
Sinha, Nitish, Board of Governors of the Federal Reserve System  
Sinha, Roshan, Indiana University  
Sinitsyn, Maxim, University of California, San Diego

Sinkinson, Michael, Yale University  
Siriwardane, Emil, Harvard Business School  
Sisak, Dana, Erasmus University Rotterdam  
Sivan, Balasubramanian, Google Research  
Skiadopoulos, George, University of Piraeus  
Skimmyhorn, William, College of William & Mary  
Skinner, Nikki, University of Georgia  
Skouras, Spyros, Athens University of Economics & Business  
Skrastins, Janis, Washington University in St. Louis  
Slaugh, Vincent, Cornell University  
Sloman, Steven, Brown University  
Sloof, Randolph, University of Amsterdam  
Smeets, Paul, University of Amsterdam  
Smith, Kevin, Stanford University  
Smith, Simon C., Federal Reserve Board  
Smith, Stephanie, University of Chicago  
Smith, Steven, Brigham Young University  
Smolin, Alex, Toulouse School of Economics  
Smolyansky, Michael, Federal Reserve Board  
Snellman, Kaisa, INSEAD  
Snyder, Clare, University of Michigan  
Snyder, Jason, University of Utah  
So, Hyunji, McGill University  
Soares, Thiago, Insper Learning Institution  
Sockin, Jason, Institute of Labor Economics  
Sockin, Michael, University of Texas at Austin  
Sohn, Eunhee, Georgia Institute of Technology  
Sojli, Elvira, University of New South Wales  
Sojourner, Aaron, University of Minnesota  
Sokolinski, Stanislav, Michigan State University  
Sokolov, Konstantin, University of Memphis  
Solal, Isabelle, ESSEC Business School  
Soll, Jack, Duke University  
Solomon, David, Boston College  
Soltani, Mohamad, University of Alberta  
Soman, Dilip, University of Toronto  
Somanchi, Sriram, University of Notre Dame  
Sommer, Svenja, HEC Paris  
Son, Yoonseock, University of Notre Dame  
Song, Changcheng, Singapore Management University  
Song, Eunhye, Georgia Institute of Technology  
Song, Fenghua, Pennsylvania State University

Song, Lina, University College London  
Song, Yang, University of Washington  
Song, Yangwei, University of Colorado Boulder  
Song, Yicheng, University of Minnesota  
Song, Yongjia, Clemson University  
Song, Yu, University of Michigan  
Song, Zhaogang, Johns Hopkins University  
Sonmez, Erkut, University of Nebraska–Lincoln  
Sorensen, Peter, University of Copenhagen  
Sorescu, Alina, Texas A&M University  
Sorokina, Nonna, Pennsylvania State University  
Soule, David, University of Richmond  
Soundarajan, Sucheta, Syracuse University  
Souther, Matthew, University of South Carolina  
Sovich, David, University of Kentucky  
Spalt, Oliver, University of Mannheim  
Spann, Martin, Ludwig Maximilian University of Munich  
Spantig, Lisa, University of Essex  
Speekenbrink, Maarten, University College London  
Spektor, Mikhail, Pompeu Fabra University  
Spiegel, Yossi, Tel Aviv University  
Spiess, Jann, Stanford Graduate School of Business  
Spiller, Stephen, University of California, Los Angeles  
Spina, Chiara, INSEAD  
Sran, Gurpal, New York University  
Sridhar, Sharada, Columbia University  
Sridharan, Suhas, Emory University  
Srinivasan, Raji, University of Texas at Austin  
Srivastava, Ankita, Bentley University  
Srivastava, Anup, University of Calgary  
Stachurski, John, Australian National University  
Staiger, Becky, Stanford University  
Stamatopoulos, Ioannis, University of Texas at Austin  
Stanton, Christopher, Harvard Business School  
Starks, Laura, University of Texas at Austin  
Stathopoulos, Andreas, University of North Carolina at Chapel Hill  
Stavrakeva, Vania, London Business School  
Stecher, Chad, Arizona State University  
Steele, Dayton, University of Minnesota, Twin Cities  
Stefan, Matthias, University of Innsbruck  
Steffen, Sebastian, Massachusetts Institute of Technology  
Steinel, Wolfgang, Leiden University

Steiner, Eva, Pennsylvania State University  
Stentoft, Lars, University of Western Ontario  
Steri, Roberto, University of Luxembourg  
Stewart, Alexander, University of St. Andrews  
Stewart, Chris, University of Chicago  
Stewart, Neil, University of Warwick  
Stice, Derrald, University of Hong Kong  
Stice-Lawrence, Lorien, University of Southern California  
Stillman, Steven, Free University of Bozen-Bolzano  
Sting, Fabian, University of Cologne  
Stock, Axel, University of Central Florida  
Stoffman, Noah, Indiana University  
Stomberg, Bridget, Indiana University Bloomington  
Stoumbos, Robert, ESSEC Business School  
Stouras, Konstantinos, University College Dublin  
Straub, Stéphane, Toulouse School of Economics  
Streitz, Daniel, Institute for Women's Health  
Strobl, Günter, Frankfurt School of Finance & Management  
Stroube, Bryan, London Business School  
Strulov-Shlain, Avner, University of Chicago  
Stubben, Stephen, University of Utah  
Stuber, Sarah, Texas A&M University  
Sturgess, Jason, Queen Mary University of London  
Sturt, Bradley, University of Illinois Chicago  
Su, Yinan, Johns Hopkins University  
Subasi, Musa, University of Maryland, College Park  
Subramani, Gauri, Lehigh University  
Subramanian, Upender, University of Texas at Dallas  
Subramanyam, Anirudh, Pennsylvania State University  
Sudhir, K., Yale University  
Suetens, Sigrid, Tilburg University  
Suh, Jungkyu, New York University  
Sui, Pengfei, Chinese University of Hong Kong, Shenzhen  
Sulaeman, Johan, National University of Singapore  
Sullivan, Colin, Purdue University  
Sullivan, Ryan, Naval Postgraduate School  
Sultanum, Bruno, Federal Reserve Bank of Richmond  
Sulz, Sandra, Erasmus University Rotterdam  
Sumida, Mika, University of Southern California  
Summer, Martin, Austrian National Bank  
Sun, Andy, Georgia Institute of Technology  
Sun, Chenshuo, New York University

Sun, Estelle, Boston University  
Sun, Jiankun, Imperial College London  
Sun, Pei, University of Manchester  
Sun, Peng, Duke University  
Sun, Qi, Shanghai University  
Sun, Shujing, University of Texas at Dallas  
Sun, Tianshu, University of Southern California  
Sun, Will Wei, Purdue University  
Sun, Xu, University of Miami  
Sun, Yacheng, Tsinghua University  
Sun, Yifei, Columbia University  
Sun, Zheng, University of Irvine, California  
Sunada, Takeaki, University of Rochester  
Sunar, Nur, University of North Carolina at Chapel Hill  
Sunder, Jayanthi, University of Arizona  
Sunder, Shyam, Yale University  
Sunderam, Adi, Harvard Business School  
Sung, Elie, HEC Paris  
Sungu, Alp, London Business School  
Supera, Dominik, Columbia University  
Sutherland, Andrew, Massachusetts Institute of Technology  
Sutter, Matthias, University of Innsbruck  
Sverchkov, Ruslan, University of Warwick  
Swanquist, Quinn, University of Alabama  
Sylvain, Benoit, Paris Dauphine University  
Sytych, Maxim, University of Michigan  
Syverson, Chad, University of Chicago  
Szydowski, Martin, University of Minnesota  
Tag, Joacim, Research Institute of Industrial Economics  
Tahoun, Ahmed, London Business School  
Tai, Mingzhu, University of Hong Kong  
Takeuchi, Ai, Ritsumeikan University  
Tallon, Jean-Marc, Paris School of Economics  
Tamoni, Andrea, Rutgers University  
Tan, Charmaine, Agency for Science, Technology and Research  
Tan, Hongru, Beijing Normal University  
Tan, Liang, Virginia Polytechnic Institute and State University  
Tan, Tarkan, Eindhoven University of Technology  
Tan, Tom, Southern Methodist University  
Tan, Xue, Southern Methodist University  
Tan, Yinliang, University of Houston  
Taneri, Niyazi, University of Cambridge

Tang, Dragon, University of Hong Kong  
Tang, Huan, HEC Paris  
Tang, Ke, Tsinghua University  
Tang, Ping, University of Texas at Dallas  
Tang, Wenjie, National University of Singapore  
Tang, Wenpin, Columbia University  
Tang, Yi, Fordham University  
Tang, Yuehua, University of Florida  
Tang, Zhuodong, University of Michigan  
Tannenbaum, Daniel, University of Nebraska–Lincoln  
Tannenbaum, David, University of Utah  
Tanrisever, Fehmi, Bilkent University  
Tarantino, Emanuele, LUISS Guido Carli  
Tartari, Valentina, Copenhagen Business School  
Taskesen, Bahar, Swiss Federal Institute of Technology Lausanne  
Tasoff, Joshua, Claremont Graduate University  
Tasselli, Stefano, Erasmus University  
Taussig, Markus, Rutgers University  
Tay, Louis, Purdue University  
Taylor, Curtis, Duke University  
Taylor, Greg, University of Oxford  
Tebaldi, Claudio, Bocconi University  
Tebbs, Joshua, University of South Carolina  
Te Kaat, Daniel, University of Groningen  
Teh, Tat How, National University of Singapore  
Telang, Rahul, Carnegie Mellon University  
Teo, Melvyn, Singapore Management University  
Teodorescu, Mike, University of Washington  
Teodoridis, Florenta, University of Southern California  
Teodorovicz, Thomaz, Copenhagen Business School  
Tereyagoglu, Necati, University of South Carolina  
Tergiman, Chloe, Pennsylvania State University  
Terrier, Camille, Queen Mary University of London  
Tervio, Marko, Aalto University  
Testoni, Marco, Tilburg University  
Teytelboym, Alex, Oxford University  
Tezcan, Tolga, Rice University  
Thakor, Richard, University of Minnesota  
Thakral, Neil, Brown University  
Thakur, Ashutosh, National University of Singapore  
Thaler, Domink, European Central Bank  
Thies, Beate, University of Mannheim

Thoeni, Christian, University of Lausanne  
Thomadsen, Raphael, Washington University in St. Louis  
Thomas, Clayton, Microsoft Research  
Thomas, Isabelle, Université Catholique de Louvain  
Thomas, Tyler, University of Waterloo  
Thompson, James, University of Waterloo  
Thompson, Philip, Purdue University  
Thornock, Todd, University of Nebraska–Lincoln  
Tian, Feng, Hong Kong University Business School  
Tian, Feng, Hong Kong Polytechnic University  
Tian, Joyce, University of Waterloo  
Tian, Lin, Fudan University  
Tian, Xiaoli, Georgetown University  
Tian, Yu, University of Central Florida  
Tilcsik, András, University of Toronto St. George Campus  
Timmer, Yannick, Board of Governors of the Federal Reserve System  
Timmermans, Oscar, London School of Economics and Political Science  
Timoshenko, Artem, Northwestern University  
Tinn, Katrin, McGill University  
Tirunillai, Seshadri, University of Houston  
Toft Hansen, Anne, Danish Center for Social Science Research  
Toh, Ying Lei, Federal Reserve Bank of Kansas City  
Tohidi, Amir, University of Pennsylvania  
Tokpavi, Sessi, Paris Nanterre University  
Toldra, Anna, University Charles III of Madrid  
Tomaino, Geoff, University of Florida  
Tomar, Sorabh, Southern Methodist University  
Tong, Jincheng, University of Toronto  
Tong, Jordan, University of Wisconsin–Madison  
Tong, Shilu, Chinese University of Hong Kong, Shenzhen  
Tong, Siliang, Nanyang Technological University  
Tonke, Sebastian, Max Planck Institute for Research on Collective Goods  
Tookes, Heather, Yale University  
Toriello, Alejandro, Georgia Institute of Technology  
Torrico, Alfredo, Polytechnique Montreal  
Tortoriello, Marco, Bocconi University  
Toulis, Panagiotis, University of Chicago  
Towry, Kristy, Emory University  
Tran, Anh, City University of London  
Tran, Ngoc-Khanh, Virginia Tech  
Tranchoero, Matteo, University of California, Berkeley  
Tremblay, Mark, University of Nevada, Las Vegas

Tremblay, Monica, College of William & Mary  
Trevino, Isabel, University of California, San Diego  
Trevino, Linda, Pennsylvania State University  
Trichakis, Nikolaos, Massachusetts Institute of Technology  
Trigeorgis, Lenos, Durham University  
Tripathi, Arvind, University of Kansas  
Tripodi, Egon, Hertie School  
Trocinska, Matylda, Ludwig Maximilian University of Munich  
Troncoso, Isamar, Harvard Business School  
Trujillo, Carlos, Universidad de los Andes  
Truong, Phong, Pennsylvania State University  
Trzcinka, Charles, Indiana University  
Tseng, Ayung, University of California, Davis  
Tserenjigmid, Gerelt, University of California, Santa Cruz  
Tsolmon, Ulya, Washington University in St. Louis  
Tsoukalas, Gerry, Boston University  
Tsui, David, University of Southern California  
Tu, Jun, Singapore Management University  
Tu, Yanping, Peking University  
Tuchman, Anna, Northwestern University  
Tucker, Emily, Clemson University  
Tuffin, Bruno, IRISA  
Tulabandhula, Theja, University of Illinois Chicago  
Tully, Stephanie, University of Southern California  
Tunc, Murat, Tilburg University  
Tungodden, Bertil, Norwegian School of Economics  
Tunuguntla, Srinivas, Duke University  
Turcic, Danko, University of California, Riverside  
Turmunkh, Uyanga, IÉSEG School of Management  
Turner, Cameron, Clemson University  
Turut, Ozge, Rutgers University  
Twedt, Brady, Texas A&M University  
Tyagi, Rajeev, University of California, Irvine  
Tymula, Agnieszka, University of Sydney  
Tzeng, Larry, National Taiwan University  
Udenio, Maximiliano, KU Leuven  
Udwani, Rajan, University of California, Berkeley  
Uetake, Kosuke, Yale School of Management  
Ugalde Araya, Paola, Louisiana State University  
Uichanco, Joline, University of Michigan  
Ulku, Sezer, Georgetown University  
Ullrich, Hannes, University of Copenhagen

Ulu, Canan, Georgetown University  
Unver, Utku, Boston College  
Upadhyay, Jalaj, Rutgers University  
Uppal, Abhinav, Indian School of Business  
Uppari, Bhavani Shanker, Singapore Management University  
Urbaczewski, Andrew, University of Denver  
Urban, Daniel, Erasmus University Rotterdam  
Urcan, Oktay, University of Illinois Urbana-Champaign  
Uribe, Jose, University of Michigan  
Urminsky, Oleg, University of Chicago  
Urrea, Gloria, University of Colorado Boulder  
Ursu, Raluca, New York University Stern School of Business  
Vadovic, Radovan, Carleton University  
Valdes, Leon, University of Pittsburgh  
Valentine, Melissa, Stanford University  
Valentini, Giovanni, LUISS Guido Carli  
Valenzuela, Ana, Baruch College  
Valero, Vanessa, University of Leicester  
Valkanov, Rossen, University of California, San Diego  
Valta, Philip, University of Bern  
Vana, Prasad, London Business School  
Vanberg, Christoph, University of Heidelberg  
Vance, Marshall, Virginia Tech  
Van De Kuilen, Gijs, Erasmus University  
Van Den Assem, Martijn, Vrije Universiteit Amsterdam  
Van Den Steen, Eric, Harvard Business School  
Van Der Beck, Philippe, Swiss Federal Institute of Technology Lausanne  
Van Der Lans, Ralf, Hong Kong University of Science and Technology  
Vanderveken, Rodolphe, Université Catholique de Louvain  
Van Der Weele, Joel, University of Amsterdam  
Van De Ven, Jeroen, University of Amsterdam  
Van Dolder, Dennie, University of Essex  
Vanhoucke, Mario, Ghent University  
Van Knippenberg, Daan, Rice University  
Van Leeuwen, Boris, Tilburg University  
Van Ness, Mike, Stanford University  
Vanneste, Bart, University College London  
Vannutelli, Silvia, Northwestern University  
Van Oordt, Maarten, Bank of Canada  
Van Ours, Jan, Erasmus University Rotterdam  
Van Parys, Bart, Massachusetts Institute of Technology  
Van Rooij, Maarten, Dutch Central Bank

Van Veldhuizen, Roel, Lund University  
Van Weelden, Richard, University of Pittsburgh  
Van Wesep, Edward, University of Colorado  
Van Zant, Alex, Rutgers University  
Vardi, Shai, Purdue University  
Vari, Miklos, Banque de France  
Varneskov, Rasmus, Copenhagen Business School  
Vasarhelyi, Miklos, Rutgers University  
Vashevko, Anthony, INSEAD Asia Campus  
Vashishtha, Rahul, Duke University  
Vasi, Ion Bogdan, University of Iowa  
Vasquez, Aurelio, Instituto Tecnológico Autónomo de México  
Vasudevan, Ellapulli V., Indian Institute of Management, Ahmedabad  
Vayanos, Phebe, University of Southern California  
Vecci, Joseph, University of Gothenburg  
Veenman, David, University of Amsterdam  
Veiga, Andre, Imperial College  
Velikov, Mihail, Pennsylvania State University  
Vellodi, Nikhil, Paris School of Economics  
Venkataraman, Ashwin, University of Texas at Dallas  
Venkataraman, Kumar, Southern Methodist University  
Venkataraman, Sriram, University of South Carolina  
Vera, Dusya, University of Western Ontario  
Verdugo, Victor, University of O'Higgins  
Verhaal, J., Tulane University  
Verwijmeren, Patrick, Erasmus University Rotterdam  
Veugelers, Reinhilde, KU Leuven  
Vijairaghavan, Vaarun, University of Calgary  
Vikander, Nick, University of Copenhagen  
Vilkov, Grigory, Frankfurt School of Finance & Management  
Villa, Sebastián, University of New Mexico  
Villacorta, Alonso, University of California, Santa Cruz  
Villanova, Daniel, University of Arkansas  
Viswanathan, S., Duke University  
Viswanath-Natraj, Ganesh, University of Warwick  
Viva, Luca Del, ESADE Business School  
Vivalt, Eva, University of Toronto  
Vladasel, Theodor, Pompeu Fabra University  
Vladimirov, Vladimir, University of Amsterdam  
Vogelsang, Timo, Frankfurt School of Finance & Management  
Voichek, Guy, Imperial College London  
Voigt, Stefan, University of Copenhagen

Volkova, Ekaterina, University of Melbourne  
Vollan, Björn, University of Innsbruck  
Von Wangenheim, Jonas, University of Bonn  
Vossler, Christian, University of Tennessee, Knoxville  
Voudouris, Alexandros, University of Essex  
Vrins, Frédéric, Université Catholique de Louvain  
Vyas, Dushyant, University of Toronto  
Waddoups, Nate, University of Denver  
Wager, Stefan, Stanford University  
Waggoner, Bo, University of Colorado Boulder  
Wagner, Alexander, University of Zurich  
Wagner, Christian, Copenhagen Business School  
Wagner, Michael, University of Washington  
Wagner, Stefan, ESMT Berlin  
Wahid, Aida, University of Toronto  
Waiser, Rob, University of Kansas  
Waisman, Caio, Northwestern University  
Wakker, Peter, Erasmus University  
Walden, Johan, University of California, Berkeley  
Waldfogel, Joel, University of Minnesota  
Walker, Dylan, Boston University  
Walker, Edward, University of California, Los Angeles  
Wallen, Jonathan, Harvard Business School  
Wallskog, Melanie, Duke University  
Walsh, Jennifer, Harvard University  
Walters, Daniel, INSEAD Doriot Research & Learning Hub  
Walther, Ansgar, Imperial College London  
Walzl, Markus, University of Innsbruck  
Wan, Xiang (Shawn), Santa Clara University  
Wan, Xiangwei, Shanghai Jiao Tong University  
Wang, Baolian, University of Florida  
Wang, Changjun, Academy of Mathematics and Systems Science  
Wang, Charles, Harvard Business School  
Wang, Chen, University of Notre Dame  
Wang, Chengsi, Monash University  
Wang, Chi-Ying, Yale School of Management  
Wang, Cong, Peking University  
Wang, Danqing, Hong Kong University of Science and Technology  
Wang, Dechun, Texas A&M University  
Wang, Emily Yucai, University of Massachusetts Amherst  
Wang, Fan, ESSEC Group  
Wang, Gaowang, Shandong University

Wang, Gavin, University of Texas at Dallas  
Wang, Guihua, University of Texas at Dallas  
Wang, He, Georgia Institute of Technology  
Wang, Hongchang, University of Texas at Dallas  
Wang, Isabel, Michigan State University  
Wang, Jasmine, University of Virginia  
Wang, Jessie, Board of Governors of the Federal Reserve System  
Wang, Jianfu, City University of Hong Kong  
Wang, Jingjing, University of Calgary  
Wang, Kaizheng, Columbia University  
Wang, Kangning, Stanford University  
Wang, Kanix, University of Cincinnati  
Wang, Laura, University of Illinois Urbana-Champaign  
Wang, Lina, Pennsylvania State University  
Wang, Linbo, University of Toronto  
Wang, Liyao, Hong Kong Baptist University  
Wang, Meng, Georgia State University  
Wang, Mengxin, University of California, Berkeley  
Wang, Michelle, Pennsylvania State University  
Wang, Pengyuan, University of Georgia  
Wang, Philip, University of Florida  
Wang, Pingle, University of Texas at Dallas  
Wang, Qian, University of Zurich  
Wang, Qiguang, Hong Kong Baptist University  
Wang, Qiong, University of Illinois Urbana-Champaign  
Wang, Rui, Lingnan University  
Wang, Ruqu, Queen's University  
Wang, Ruxian, Johns Hopkins University  
Wang, Sarah, University of Warwick  
Wang, Sean, Southern Methodist University  
Wang, Shanshan, HEC Montreal  
Wang, Shi, Ohio State University  
Wang, Shiheng, Hong Kong University of Science and Technology  
Wang, Shixin, Chinese University of Hong Kong  
Wang, Shiya, Stanford Graduate School of Business  
Wang, Shouqiang, University of Texas at Dallas  
Wang, Shuting, Baruch College  
Wang, Stephanie, University of Pittsburgh  
Wang, Tianyang, Colorado State University  
Wang, Tianyu, Tsinghua University  
Wang, Tong, Yale University  
Wang, Wanyi, University of California, Irvine

Wang, Wei, Temple University  
Wang, Weiguang, University of Rochester  
Wang, Weina, Carnegie Mellon University  
Wang, Weiquan, Chinese University of Hong Kong  
Wang, Wen, University of Maryland, College Park  
Wang, Wenyu, Indiana University  
Wang, Xiaolu, Iowa State University  
Wang, Xiaoning (Gavin), University of Texas at Dallas  
Wang, Xin, Hong Kong University of Science and Technology  
Wang, Xin, University of Hong Kong  
Wang, Xinshang, Alibaba Group  
Wang, Xiupeng, Stanford University  
Wang, Xuan, Hong Kong University of Science and Technology  
Wang, Yajun, Baruch College  
Wang, Yanbo, HKU Business School  
Wang, Yifei, University of Maryland, College Park  
Wang, Yingfei, University of Washington  
Wang, Yining, University of Texas at Dallas  
Wang, Yixin Iris, University of Illinois Urbana-Champaign  
Wang, Yulan, Hong Kong Polytechnic University  
Wang, Yunjie, Renmin University of China  
Wang, Yuyan, Stanford University  
Wang, Zhe, Pennsylvania State University  
Wang, Zheng, European University Institute  
Wang, Zhi Jay, University of Oregon  
Wang, Zhu, Federal Reserve Bank of Richmond  
Wang, Zigan, Chinese University of Hong Kong  
Wang, Zizhuo, Chinese University of Hong Kong, Shenzhen  
Wangerin, Daniel, University of Wisconsin–Madison  
Wang Huber, Amy, Wharton School of the University of Pennsylvania  
Warachka, Mitch, Chapman University  
Ward, George, Oxford University  
Wardlaw, Malcolm, University of Georgia  
Wasser, Cédric, University of Basel  
Wasserman, Melanie, University of California, Los Angeles  
Wasserman, Melissa, University of Texas at Austin  
Watson, Jeremy, University of Minnesota  
Watts, Edward, Yale School of Management  
Watzinger, Martin, Ludwig Maximilian University of Munich  
Weagley, Daniel, Georgia Institute of Technology  
Webb, Ryan, University of Toronto  
Weber, Joerg, University of Exeter

Weber, Michael, University of Chicago  
Weber, Roberto, University of Zurich  
Weber, Stephanie, Yale University  
Wehrheim, David, IESE Business School  
Wei, Jason, University of Toronto  
Wei, John, Hong Kong Polytechnic University  
Wei, Lai, Boston College  
Wei, Lai, Lingnan University  
Wei, Mengxing, Nankai University  
Wei, Sarah, University of Warwick  
Wei, Yanhao, University of Southern California  
Wei, Yehua, Duke University  
Wei, Zaiyan, Purdue University  
Weidmann, Ben, Harvard University  
Weinstein, Asaf, Hebrew University of Jerusalem  
Weitzel, Utz, University of Utrecht  
Weizsäcker, Georg, Humboldt University of Berlin  
Wellman, Laura, University of Oregon  
Welsch, Anthony, University of Texas at Austin  
Wen, Quan, Georgetown University  
Wen, Wen, University of Texas at Austin  
Weng, Qian, Renmin University of China  
Weng, Xi, Peking University  
Wengström, Erik, Lund University  
Wentland, Kelly, George Mason University  
Werner, Peter, Maastricht University  
Werner, Timothy, University of Texas at Austin  
Wernicke, Georg, HEC Paris  
Wertz, John, Indiana University Bloomington  
West, Jeremy, University of California, Santa Cruz  
Westphal, Monika, University of Cologne  
Whaley, Chris, RAND Corporation  
Whaley, Christopher, Brown University  
Wheeler, P., Tulane University  
Whelan, Paul, Imperial College  
Whillans, Ashley, Harvard Business School  
Whipple, Benjamin, University of Georgia  
White, Alexander, Tsinghua University  
White, Brian, Cornell University  
White, Joshua, Vanderbilt University  
Whited, Robert, North Carolina State University  
Whiting, Mark, Wharton School of the University of Pennsylvania

Wibbens, Phebo, INSEAD  
Wiernsperger, Martin, Vienna University of Economics and Business  
Wiesemann, Wolfram, Imperial College London  
Wiesen, Daniel, University of Cologne  
Wijnsma, Sytske, University of California, Berkeley  
Wilbur, Kenneth, University of California, San Diego  
Wilde, Daniel, Wharton School of the University of Pennsylvania  
Wilde, Jaron, University of Iowa  
Wildenbeest, Matthijs R., University of Alabama  
Wilder, Bryan, Carnegie Mellon University  
Wiles, Emma, Massachusetts Institute of Technology  
Wilkins, Mike, University of Kansas  
Williams, Braden, University of Texas at Austin  
Williams, Brian, Texas A&M University  
Williams, Christopher, University of Michigan  
Williams, Jared, University of South Florida  
Wilmers, Nathan, Massachusetts Institute of Technology  
Wilson, Alistair, University of Pittsburgh  
Wilson, Chris, Loughborough University  
Wilson, James, North Carolina State University  
Winkelmann, Lars, Freie Universität Berlin  
Winship, Christopher, Harvard University  
Winton, Andrew, University of Minnesota  
Wipusanawan, Chayanin, University of Passau  
Wittry, Michael, Ohio State University  
Wiwattanakantang, Yupana, National University of Singapore  
Wix, Carlo, Federal Reserve Board  
Woerner, Andrej, Ludwig Maximilian University of Munich  
Wohl, Avi, Tel Aviv University  
Wohlfart, Johannes, University of Copenhagen  
Wolfolds, Sarah, Cornell University  
Wolthoff, Ronald, University of Toronto  
Wong, Yu Ting Forester, University of Southern California  
Wooten, Joel, University of South Carolina  
Workiewicz, Maciej, ESSEC Business School  
Wowak, Kaitlin, University of Notre Dame  
Wozabal, David, Technical University of Munich  
Wright, Julian, National University of Singapore  
Wright, Nataliya, Columbia University  
Wu, Andy, Harvard Business School  
Wu, Anqi, Florida International University  
Wu, Bingxiao, Rutgers University

Wu, Brian, University of Michigan  
Wu, Chunhua, University of British Columbia  
Wu, Di, University of Michigan  
Wu, George, University of Chicago  
Wu, Haibin, City University of Hong Kong  
Wu, Hong, Fudan University  
Wu, Hugh Xiaolong, Washington University in St. Louis  
Wu, Jane, University of California, Los Angeles  
Wu, Jiahua, Imperial College London  
Wu, Jian, Purdue University  
Wu, Jing, Chinese University of Hong Kong  
Wu, Julie, University of Nebraska–Lincoln  
Wu, Lingxiao, HEC Montreal  
Wu, Manxi, Cornell University  
Wu, Qi, Case Western Reserve University  
Wu, Qi, City University of Hong Kong  
Wu, Qiang, Hong Kong Polytechnic University  
Wu, Sang, Columbia University  
Wu, Shijia, Chinese University of Hong Kong, Shenzhen  
Wu, Wei, Texas A&M University  
Wu, Wei Biao, University of Chicago  
Wu, Xi, University of California, Berkeley  
Wu, Xiaole, Fudan University  
Wu, Yanbin, Emory University  
Wu, Yanhui, University of Hong Kong  
Wu, Yaozhong, National University of Singapore  
Wu, Yue, University of Pittsburgh  
Wu, Yufeng, Ohio State University  
Wu, Zhiyan, Erasmus University  
Xia, Han, University of Texas at Dallas  
Xia, Ying, Monash University  
Xiang, Jia, Indiana University Bloomington  
Xiao, Erte, Monash University  
Xiao, Guang, Hong Kong Polytechnic University  
Xiao, Jason, University of Rochester  
Xiao, Kairong, Columbia University  
Xiao, Ping, University of Melbourne  
Xiao, Serena, University of Texas at Dallas  
Xiao, Steven, University of Texas at Dallas  
Xiao, Yizhou, Chinese University of Hong Kong  
Xiao, Yongbo, Tsinghua University  
Xiaolan, Mindy, University of Texas at Austin

Xiaolin, Li, London School of Economics and Political Science  
Xie, Chloe, Massachusetts Institute of Technology  
Xie, Fei, University of Delaware  
Xie, Jiaheng, University of Delaware  
Xie, Jingui, Technical University of Munich  
Xie, Liyan, Chinese University of Hong Kong, Shenzhen  
Xie, Peng, California State University, East Bay  
Xie, Weijun, Georgia Institute of Technology  
Xie, Wensi, Chinese University of Hong Kong  
Xie, Yao, Georgia Institute of Technology  
Xie, Yifang, Georgetown University  
Xie, Ying, University of Texas at Dallas  
Xin, Linwei, University of Chicago  
Xing, Adele, Santa Clara University  
Xing, Hao, Boston University  
Xing, Yiqing, Johns Hopkins University  
Xing, Yuhang, Rice University  
Xiong, Grazia, Utah State University  
Xiong, Ruoxuan, Stanford University  
Xiong, Yan, Hong Kong University of Science and Technology  
Xu, Fasheng, University of Connecticut  
Xu, Gongjun, University of Michigan  
Xu, Guo, University of California, Berkeley  
Xu, Heng, University of Florida  
Xu, Huifu, Chinese University of Hong Kong  
Xu, Janet, Stanford University  
Xu, Jennifer, Bentley University  
Xu, Jianyu, University of California, Santa Barbara  
Xu, Jingjun David, City University of Hong Kong  
Xu, Kan, Arizona State University  
Xu, Lai, Syracuse University  
Xu, Liang, Singapore Management University  
Xu, Linli, University of Minnesota  
Xu, Lizhen, Georgia Institute of Technology  
Xu, Luze, University of Michigan  
Xu, Nancy, Boston College  
Xu, Nina, University of Connecticut  
Xu, Pan, University of Maryland, College Park  
Xu, Qiping, University of Illinois Urbana-Champaign  
Xu, Renyuan, University of Southern California  
Xu, Sheng-Jun, University of Alberta  
Xu, Simon, Harvard Business School

Xu, Yi, University of Maryland  
Xu, Yongxin, Monash University  
Xu, Yunzong, Massachusetts Institute of Technology  
Xu, Yuqian, University of North Carolina at Chapel Hill  
Xu, Zhaoxia, University of New South Wales  
Xu, Zhengyang, City University of Hong Kong  
Xu, Zhou, Hong Kong Polytechnic University  
Xu, Zibin, City University of Hong Kong  
Xue, Hao, Duke University  
Xue, Ling, University of Georgia  
Xue, Mengying, University of Science and Technology of China  
Yafeh, Yishay, Hebrew University of Jerusalem  
Yahav, Inbal, Tel Aviv University  
Yamaguchi, Shotaro, University of Maryland  
Yan, Chiwei, University of California, Berkeley  
Yan, Dong, Stockholm School of Economics  
Yan, Hongjun, DePaul University  
Yan, Julia, University of British Columbia  
Yan, Lu, Indiana University  
Yan, Shu, Oklahoma State University  
Yan, Yuling, Princeton University  
Yan, Zhenzhen, Nanyang Technological University  
Yang, Agnes, University of Minnesota  
Yang, Bicheng, Hong Kong Polytechnic University  
Yang, Chunyu, BI Norwegian Business School  
Yang, Daniel, Hong Kong University of Science and Technology  
Yang, Hanbin, Harvard Business School  
Yang, Heather, Bocconi University  
Yang, Holly, Singapore Management University  
Yang, Jeremy, Harvard Business School  
Yang, Jian, New Jersey Institute of Technology  
Yang, Jingni, University of Sydney  
Yang, Jingyuan, George Mason University  
Yang, Jun, Indiana University  
Yang, Keyang (Daniel), Washington State University  
Yang, Lusi, University of Arizona  
Yang, Luyi, University of California, Berkeley  
Yang, Mingwen, University of Washington  
Yang, Mochen, University of Minnesota  
Yang, S. Alex, London Business School  
Yang, Shijie, Southern University of Science and Technology  
Yang, Tiantian, Wharton School of the University of Pennsylvania

Yang, Wenhao, University of North Carolina at Chapel Hill  
Yang, Xiye, Rutgers University  
Yang, Yang, University of Notre Dame  
Yang, Yanhua Sunny, University of Connecticut  
Yang, Yi, Hong Kong University of Science and Technology  
Yang, Yong, Chinese University of Hong Kong  
Yang, Yuanchen, International Monetary Fund  
Yang, Yuhong, University of Minnesota  
Yang, Zhibin (Ben), University of Oregon  
Yang, Zihao, Carnegie Mellon University  
Yannelis, Constantine, University of Chicago  
Yao, Chen, Chinese University of Hong Kong  
Yao, Dai, Hong Kong Polytechnic University  
Yao, Shiqing, Monash University  
Yao, Song, Washington University in St. Louis  
Yapar, Ozge, Indiana University Bloomington  
Yaraghi, Niam, Brookings Institution  
Yates, Andrew, University of North Carolina at Chapel Hill  
Yavuz, Ipek, McGill University  
Yavuz, M. Deniz, Purdue University  
Ye, Shun, George Mason University  
Ye, Teng, University of Minnesota, Twin Cities  
Ye, Tiange, University of Southern California  
Ye, Zikun, University of Washington  
Yeaton, Matthew, Columbia University  
Yehezkel, Yaron, Tel Aviv University  
Yenmez, Bumin, Washington University in St. Louis  
Yeomans, Michael, Imperial College London  
Yeomans, Mike, University of Chicago Booth School of Business  
Yerramilli, Vijay, University of Houston  
Yeung, Bernard, National University of Singapore  
Yeung, Eric, Cornell University  
Yeung, Kelvin, City University of Hong Kong  
Yi, Irene, University of Toronto  
Yi, Junjian, Peking University  
Yi, Livia, Boston College  
Yildirim, Pinar, University of Pennsylvania  
Yildiz, Baris, Koç University  
Yilmaz, Erdem, Erasmus University Rotterdam  
Yilmaz, Ovunc, University of Colorado Boulder  
Yimfor, Emmanuel, University of Michigan  
Yin, Benda, Duke University

Yin, Chengdong, Renmin University of China  
Yin, Huaxiang, Nanyang Business School  
Yin, Junming, Carnegie Mellon University  
Ying, Chao, Chinese University of Hong Kong  
Yip, Jeremy, University of Pennsylvania  
Yonder, Erkan, Concordia University  
Yonker, Scott, Cornell University  
Yoo, Changseung, McGill University  
Yoo, Onesun, University College London  
Yook, Youngsuk, Federal Reserve Board  
Yoon, Aaron, Northwestern University  
Yoon, Ji Hee, University of Wisconsin–Madison  
Yorulmazer, Tanju, Koç University  
Yost, Benjamin, Boston College  
You, Haifeng, Hong Kong University of Science and Technology  
You, Wei, Hong Kong University of Science and Technology  
Youn, Seokjun, University of Arizona  
Young, Donald, Indiana University  
Young, Michael, University of Missouri  
Young, Richard, Ohio State University  
Young-Hyman, Trevor, University of Pittsburgh  
Younkin, Peter, University of Oregon  
Yu, Christina, Cornell University  
Yu, Edison, Federal Reserve Bank of Philadelphia  
Yu, Fan, Claremont McKenna College  
Yu, Frank, China Europe International Business School  
Yu, Jianfeng, Tsinghua University  
Yu, Jiayi Joey, Fudan University  
Yu, Jungju, Korea Advanced Institute of Science and Technology  
Yu, Lizi, University of Queensland  
Yu, Man, Hong Kong University of Science and Technology  
Yu, Qin, National University of Singapore  
Yu, Qiuping, Georgetown University  
Yu, Sandy, University of Minnesota  
Yu, Sophie, Duke University  
Yu, Tong, University of Cincinnati  
Yu, Xian, Ohio State University  
Yu, Xiaoyun, Indiana University  
Yu, Yimin, City University of Hong Kong  
Yu, Yong, University of Texas at Austin  
Yuan, Y. Connie, Cornell University  
Yuan, Ye, Peking University

Yuan, Yuan, Purdue University  
Yucel, Safak, Georgetown University  
Yue, Wei T., City University of Hong Kong  
Yueshen, Bart, Singapore Management University  
Yuferova, Darya, Norwegian School of Economics  
Yuksel, Sevgi, New York University  
Yust, Christopher, Texas A&M University  
Zach, Tzachi, Ohio State University  
Zacharias, Christos, University of Miami  
Zaffaroni, Paolo, Imperial College London  
Zakolyukina, Anastasia, University of Chicago  
Zaldokas, Alminas, Hong Kong University of Science and Technology  
Zalmanson, Lior, Tel Aviv University  
Zambrana, Rafael, University of Notre Dame  
Zanarone, Giorgio, HEC Lausanne  
Zandberg, Jonathan, University of Pennsylvania  
Zang, Amy, Hong Kong University of Science and Technology  
Zantedeschi, Daniel, University of South Florida  
Zarghamee, Homa, Barnard College  
Zator, Michal, University of Notre Dame  
Zawadowski, Adam, Central European University  
Zeckhauser, Richard, Harvard University  
Zehnder, Christian, University of Lausanne  
Zemsky, Peter, INSEAD  
Zender, Jaime, University of Colorado  
Zeng, Jacob, University of Texas at Austin  
Zeng, Jing, University of Bonn  
Zeng, Yao, University of Pennsylvania  
Zennyu, Yusuke, Kobe University  
Zentefis, Alexander, Yale University  
Zerbib, Olivier David, Boston University  
Zetlin-Jones, Ariel, Carnegie Mellon University  
Zhalechian, Mohammad, University of Michigan  
Zhan, Dongyuan, University College London  
Zhan, Xintong, Fudan University  
Zhang, Feifan, Duke University  
Zhang, Bin, Texas A&M University  
Zhang, Bohui, Chinese University of Hong Kong, Shenzhen  
Zhang, Can, Duke University  
Zhang, Chendi, University of Exeter  
Zhang, Chong, Tilburg University  
Zhang, Chuanchuan, Central University of Finance and Economics

Zhang, Dan, University of Colorado Boulder  
Zhang, David, Rice University  
Zhang, Donghang, University of South Carolina  
Zhang, Emma, Monash University  
Zhang, Emma Jingfei, Emory University  
Zhang, Feng, Southern Methodist University  
Zhang, Gaoqing, University of Minnesota  
Zhang, Hailun, Chinese University of Hong Kong  
Zhang, Han, Michigan State University  
Zhang, Hanjiang, Washington State University  
Zhang, Hansen, Duke University  
Zhang, Harold, University of Texas at Dallas  
Zhang, He, University of South Florida  
Zhang, Heng, Arizona State University  
Zhang, Hong, Singapore Management University  
Zhang, Huai, Nanyang Technological University  
Zhang, Huanan, University of Colorado Boulder  
Zhang, Ivy, University of California, Riverside  
Zhang, James, University of Texas at Dallas  
Zhang, Jenny Li, University of British Columbia  
Zhang, Jian, University of Hong Kong  
Zhang, Jiding, Arizona State University  
Zhang, Jieying, University of Texas at Dallas  
Zhang, Jiheng, Hong Kong University of Science and Technology  
Zhang, Jingjing, Indiana University  
Zhang, Jingwei, University of California, Los Angeles  
Zhang, Jingwei, Chinese University of Hong Kong, Shenzhen  
Zhang, Jinyuan, University of California, Los Angeles  
Zhang, Jonathan, McMaster University  
Zhang, Joseph, University of Memphis  
Zhang, Juanjuan, Massachusetts Institute of Technology  
Zhang, Juheng, University of Massachusetts Lowell  
Zhang, Kelly, Columbia University  
Zhang, Kun, Renmin University of China  
Zhang, Kunpeng, University of Maryland, College Park  
Zhang, Laurina, Boston University  
Zhang, Lei, City University of Hong Kong  
Zhang, Letian, Harvard University  
Zhang, Liandong, Singapore Management University  
Zhang, Linjun, Rutgers University  
Zhang, Longtian, Central University of Finance and Economics  
Zhang, Luhao, Columbia University

Zhang, Mengxia, Western University  
Zhang, Miao, University of Southern California  
Zhang, Minmin, University of Texas at Dallas  
Zhang, Nanxi, University of Western Ontario  
Zhang, Pengfei, University of Texas at Dallas  
Zhang, Renyu, Chinese University of Hong Kong  
Zhang, Ruishen, Shanghai University  
Zhang, Shichen, Nankai University  
Zhang, Shunyu, Harvard Business School  
Zhang, Shuo, Northeastern University  
Zhang, Victoria, University of Wisconsin–Madison  
Zhang, Walter, University of Chicago  
Zhang, Weina, National University of Singapore  
Zhang, Wenchang, Indiana University Bloomington  
Zhang, Wenrui, Colorado State University  
Zhang, Xiaowei, Hong Kong University of Science and Technology  
Zhang, Xingtang, University of Colorado Boulder  
Zhang, Xingyue, University of Washington Tacoma  
Zhang, Xinran, Central University of Finance and Economics  
Zhang, Xinyu, University of Science and Technology of China  
Zhang, Xu, London Business School  
Zhang, Xuan, Columbia University  
Zhang, Xun, National University of Singapore  
Zhang, Yang, University of Kent  
Zhang, Ye, Stockholm School of Economics  
Zhang, Yinghao, University of Cincinnati  
Zhang, Yingjie, Peking University  
Zhang, Yiwei, University of Wisconsin–Madison  
Zhang, Yuan, University of Texas at Dallas  
Zhang, Yuchen, Tulane University  
Zhang, Yue, Baruch College  
Zhang, Yue, Pennsylvania State University  
Zhang, Yupu, University of Hong Kong  
Zhang, Zhe, University of California, San Diego  
Zhang, Zhe, University of Texas at Dallas  
Zhang, Zhoupeng, University of Toronto  
Zhao, Feng, University of Texas at Dallas  
Zhao, Haipei, Lehigh University  
Zhao, Jinglong, Boston University  
Zhao, Long, National University of Singapore  
Zhao, Ming, University of Delaware  
Zhao, Minyuan, Washington University in St. Louis

Zhao, Qingyuan, University of Cambridge  
Zhao, Wanli, Bocconi University  
Zhao, Wenhui, Shanghai Jiao Tong University  
Zhao, Wuyang, University of Texas at Austin  
Zhao, Xia, University of Georgia  
Zhao, Xiaofei, Georgetown University  
Zhao, Xiaojian, Monash University  
Zhao, Xuying, Texas A&M University  
Zhao, Zifeng, University of Notre Dame  
Zhdanov, Alexei, Pennsylvania State University  
Zheng, Andrew, Massachusetts Institute of Technology  
Zheng, Fanyin, Columbia University  
Zheng, Jie, Tsinghua University  
Zheng, Jinyang, Purdue University  
Zheng, Weiting, University of New South Wales  
Zheng, Xin, University of British Columbia  
Zheng, Zeyu, University of California, Berkeley  
Zheng, Zhichao, Singapore Management University  
Zhong, Chen-Bo, University of Toronto  
Zhong, Hongda, University of Texas at Dallas  
Zhong, Qinlin, Fudan University  
Zhong, Weijie, Stanford Graduate School of Business  
Zhong, Yuan, University of Chicago  
Zhong, Zachary, University of Toronto  
Zhong, Zhuo, University of Melbourne  
Zhou, Angela, University of Southern California  
Zhou, Bobby, University of Maryland, College Park  
Zhou, Dexin, Baruch College  
Zhou, Enlu, Georgia Institute of Technology  
Zhou, Frank, Wharton School of the University of Pennsylvania  
Zhou, Guofu, Washington University in St. Louis  
Zhou, Luofeng, New York University  
Zhou, Maggie, University of Michigan  
Zhou, Meizi, Boston University  
Zhou, Mi, University of British Columbia  
Zhou, Sean, Chinese University of Hong Kong  
Zhou, Tingyu, Florida State University  
Zhou, Tongxin, Arizona State University  
Zhou, Wenjun, University of Tennessee, Knoxville  
Zhou, Xing, Southern Methodist University  
Zhou, Yang, Fudan University  
Zhou, Yangfang, Singapore Management University

Zhou, Yeqing, Eindhoven University of Technology  
Zhou, Yuan, Tsinghua University  
Zhou, Yun, McMaster University  
Zhou, Zhengyuan, Stanford University  
Zhou, Zihao, University College London  
Zhu, Chenqi, University of Irvine, California  
Zhu, Christina, Wharton School of the University of Pennsylvania  
Zhu, Feng, Harvard University  
Zhu, Ian, National University of Singapore  
Zhu, Jason, Microsoft Corporation  
Zhu, Kai, Bocconi University  
Zhu, Linyan, London School of Economics and Political Science  
Zhu, Meng, Johns Hopkins University  
Zhu, Mingxi, Georgia Institute of Technology  
Zhu, Qifei, Nanyang Technological University  
Zhu, Quanyan, New York University  
Zhu, Ruihao, Cornell University  
Zhu, Shixiang, Carnegie Mellon University  
Zhu, Ting, Purdue University  
Zhu, Wei, University of Illinois Urbana-Champaign  
Zhu, Weiming, Universidad de Navarra  
Zhu, Xinrong, Imperial College  
Zhu, Yi, University of Minnesota  
Zhu, Yinchu, Brandeis University  
Zhu, Yunxia, University of Nebraska–Lincoln  
Zhu, Yuting, National University of Singapore  
Zhu, Zhitao, Chinese University of Hong Kong  
Zhuo, Ran, University of Michigan  
Zia, Mohammad, Chapman University  
Ziani, Juba, Georgia Institute of Technology  
Ziegler, Andreas G. B., University of Essex  
Zimmerman, Peter, Federal Reserve Bank of Cleveland  
Zimmermann, Florian, University of Bonn  
Zimmermann, Steffen, Ulm University  
Zimmermann, Tom, University of Cologne  
Zitzewitz, Eric, Dartmouth College  
Zlatev, Julian, Harvard University  
Zoican, Marius, University of Toronto Mississauga  
Zolotoy, Leon, University of Melbourne  
Zorc, Sasa, University of Virginia  
Zou, Yuan, Harvard Business School  
Zou, Eric, University of Oregon

Zou, Hong, University of Hong Kong

Zou, Jiacheng, Stanford University

Zou, Tianxin, University of Florida

Zoumpoulis, Spyros, INSEAD

Zuazu-Bermejo, Izaskun, University of Duisburg-Essen

Zubanov, Nick, University of Constance

Zubeldia, Martin, University of Minnesota, Twin Cities

Zucker, Ariel, University of California, Santa Cruz

Zufall, Frederike, Max Planck Institute for Research on Collective Goods

Zureich, Jake, Lehigh University

Zviadadze, Irina, HEC Paris

Zychlinski, Noa, Technion – Israel Institute of Technology

Zykaj, Blerina, Clemson University
